# Supplementary material for: Cross-Scale Analyses of Animal and Human Gut Microbiome Assemblies from Metacommunity to Global Landscape
Source: PubMed Central journal article supplement (PMC8407200; doi:10.1128/msystems.00633-21), 2021-07-06
Supplement: msystems.00633-21-st002.pdf [file msystems.00633-21-st002.pdf]

**Table S2.** The results of fitting the MSN (multi-site neutral) model at the host species-level or microbial metacommunity scale: the AGM samples from a single animal species were treated as a meta-community, and a total of 274 meta-communities (corresponding to 274 animal species) were tested against the MSN model.

| Classes                             | Species                        | No. of Samples             | $L_0$      | $\theta$  | $M$ -value | $m$    | Metacommunity |           |      |       | Local community |           |      |       |
|-------------------------------------|--------------------------------|----------------------------|------------|-----------|------------|--------|---------------|-----------|------|-------|-----------------|-----------|------|-------|
|                                     |                                |                            |            |           |            |        | $L_M$         | $N_M$     | $N$  | $p_M$ | $L_L$           | $N_L$     | $N$  | $p_L$ |
| Chromadorea                         | <i>Caenorhabditis briggsae</i> | 5                          | -1903.792  | 23.584    | 6115.352   | 0.0569 | -1013.550     | 0         | 2500 | 0.000 | -254.030        | 0         | 2500 | 0.000 |
|                                     | <i>Caenorhabditis remanei</i>  | 39                         | -23952.599 | 1378.138  | 7.853      | 0.0002 | -24044.377    | 1411      | 2500 | 0.564 | -23671.050      | 821       | 2500 | 0.328 |
|                                     | #Passing rate (%)              |                            |            |           |            |        |               |           |      | 50    |                 |           |      | 50    |
| Arachnida                           | <i>Agele difficilis</i>        | 5                          | -7408.597  | 1059.461  | 25.640     | 0.0007 | -6550.243     | 5         | 2500 | 0.002 | -6667.656       | 12        | 2500 | 0.005 |
|                                     | <i>Agele labyrinthica</i>      | 5                          | -4098.018  | 700.037   | 12.925     | 0.0004 | -3918.288     | 509       | 2500 | 0.204 | -3965.724       | 681       | 2500 | 0.272 |
|                                     | <i>Araneae</i>                 | 3                          | -1672.726  | 791.039   | 8.556      | 0.0006 | -1518.761     | 361       | 2500 | 0.144 | -1557.761       | 491       | 2500 | 0.196 |
|                                     | <i>Artema atlanta</i>          | 5                          | -2464.458  | 177.164   | 10.103     | 0.0002 | -2721.574     | 2297      | 2500 | 0.919 | -2548.797       | 1781      | 2500 | 0.712 |
|                                     | <i>Dictis striatipes</i>       | 5                          | -9965.705  | 1306.892  | 37.190     | 0.0010 | -8684.506     | 0         | 2500 | 0.000 | -8828.366       | 0         | 2500 | 0.000 |
|                                     | <i>Hylyphantes graminicola</i> | 5                          | -6726.821  | 1228.894  | 23.444     | 0.0006 | -5995.510     | 7         | 2500 | 0.003 | -6128.189       | 28        | 2500 | 0.011 |
|                                     | <i>Nurscia albofasciata</i>    | 5                          | -3816.326  | 336.186   | 15.031     | 0.0004 | -4008.710     | 2039      | 2500 | 0.816 | -3884.117       | 1579      | 2500 | 0.632 |
|                                     | <i>Pirata subpiraticus</i>     | 5                          | -5527.738  | 864.407   | 16.322     | 0.0003 | -5277.102     | 379       | 2500 | 0.152 | -5329.552       | 531       | 2500 | 0.212 |
|                                     | <i>Spider</i>                  | 2                          | -100.550   | 21.320    | 0.733      | 0.0000 | -116.810      | 1665      | 2500 | 0.666 | -119.426        | 1728      | 2500 | 0.691 |
|                                     | <i>Ummeliata insecticeps</i>   | 5                          | -6299.336  | 1074.720  | 21.748     | 0.0009 | -5454.626     | 0         | 2500 | 0.000 | -5580.758       | 4         | 2500 | 0.002 |
|                                     | Passing rate (%)               |                            |            |           |            |        |               |           |      | 60    |                 |           |      | 60    |
|                                     | Malacostraca                   | <i>Callinectes sapidus</i> | 7          | -5373.477 | 344.864    | 14.516 | 0.0005        | -5214.159 | 636  | 2500  | 0.254           | -5251.601 | 729  | 2500  |
| <i>Eriocheir sinensis</i>           |                                | 4                          | -4035.219  | 2276.076  | 15.265     | 0.0013 | -3414.437     | 3         | 2500 | 0.001 | -3466.705       | 5         | 2500 | 0.002 |
| not applicable                      |                                | 2                          | -4857.558  | 370.429   | 55.844     | 0.0002 | -4614.889     | 310       | 2500 | 0.124 | -4693.312       | 468       | 2500 | 0.187 |
| <i>Orchestia stephensi</i>          |                                | 2                          | -3230.574  | 386.918   | 28.299     | 0.0001 | -3038.512     | 332       | 2500 | 0.133 | -3119.896       | 621       | 2500 | 0.248 |
| <i>Porcellio laevis</i>             |                                | 4                          | -9034.694  | 1495.311  | 58.642     | 0.0030 | -8150.636     | 0         | 2500 | 0.000 | -8378.197       | 11        | 2500 | 0.004 |
| <i>Talitrus saltator</i>            |                                | 3                          | -3340.999  | 262.977   | 25.107     | 0.0001 | -3166.278     | 448       | 2500 | 0.179 | -3225.563       | 599       | 2500 | 0.240 |
| <i>Talorchestia pelecyaniformis</i> |                                | 3                          | -8338.420  | 521.861   | 57.951     | 0.0002 | -8327.657     | 1222      | 2500 | 0.489 | -8186.861       | 681       | 2500 | 0.272 |
| #Passing rate (%)                   |                                |                            |            |           |            |        |               |           |      | 71.4  |                 |           |      | 71.4  |
| Insecta                             | <i>Acanthocinus aedilis</i>    | 2                          | -2328.678  | 841.499   | 17.615     | 0.0008 | -1836.414     | 2         | 2500 | 0.001 | -1878.723       | 1         | 2500 | 0.000 |
|                                     | <i>Acheta domesticus</i>       | 8                          | -11240.433 | 621.121   | 29.210     | 0.0009 | -10535.695    | 45        | 2500 | 0.018 | -10597.707      | 42        | 2500 | 0.017 |
|                                     | <i>Acmaeops septentrionis</i>  | 2                          | -3056.393  | 614.131   | 34.693     | 0.0017 | -2517.703     | 2         | 2500 | 0.001 | -2602.189       | 3         | 2500 | 0.001 |
|                                     | <i>Aleochara bilineata</i>     | 4                          | -391.719   | 61.443    | 1.183      | 0.0002 | -320.543      | 372       | 2500 | 0.149 | -334.295        | 461       | 2500 | 0.184 |
|                                     | <i>Aleochara bipustulata</i>   | 4                          | -276.038   | 83.259    | 0.770      | 0.0002 | -224.264      | 466       | 2500 | 0.186 | -227.196        | 523       | 2500 | 0.209 |
|                                     | <i>Anabrus simplex</i>         | 46                         | -15179.798 | 143.651   | 12.457     | 0.0023 | -17288.973    | 2500      | 2500 | 1.000 | -14287.690      | 2         | 2500 | 0.001 |
|                                     | <i>Anopheles stephensi</i>     | 2                          | -1012.534  | 357.486   | 17.057     | 0.0010 | -873.789      | 168       | 2500 | 0.067 | -909.267        | 300       | 2500 | 0.120 |
|                                     | <i>Apis mellifera</i>          | 231                        | -75709.632 | 337.356   | 7.150      | 0.0005 | -90656.911    | 2500      | 2500 | 1.000 | -70363.400      | 0         | 2500 | 0.000 |
|                                     | <i>Azteca sp</i>               | 2                          | -786.316   | 346.152   | 7.156      | 0.0011 | -641.345      | 138       | 2500 | 0.055 | -661.961        | 186       | 2500 | 0.074 |
|                                     | <i>Bemisia tabaci</i>          | 20                         | -1401.708  | 8.983     | 19.412     | 0.0022 | -2998.327     | 2499      | 2500 | 1.000 | -1301.031       | 410       | 2500 | 0.164 |
|                                     | <i>Boisea trivittata</i>       | 2                          | -220.726   | 23.385    | 1.981      | 0.0000 | -217.769      | 1197      | 2500 | 0.479 | -219.259        | 1206      | 2500 | 0.482 |
|                                     | <i>Bombus bimaculatus</i>      | 5                          | -1413.940  | 138.439   | 4.887      | 0.0002 | -1356.446     | 813       | 2500 | 0.325 | -1382.306       | 988       | 2500 | 0.395 |
|                                     | <i>Bombus pascuorum</i>        | 106                        | -46650.019 | 695.439   | 12.558     | 0.0002 | -66290.722    | 2500      | 2500 | 1.000 | -50858.281      | 2500      | 2500 | 1.000 |
|                                     | <i>Cephalotes atratus</i>      | 3                          | -650.636   | 322.468   | 3.126      | 0.0009 | -514.189      | 134       | 2500 | 0.054 | -526.954        | 155       | 2500 | 0.062 |
|                                     | <i>Cephalotes borgmeieri</i>   | 2                          | -182.183   | 80.924    | 1.217      | 0.0004 | -140.646      | 412       | 2500 | 0.165 | -145.017        | 469       | 2500 | 0.188 |
|                                     | <i>Cephalotes clypeatus</i>    | 3                          | -316.399   | 167.273   | 1.150      | 0.0002 | -262.949      | 488       | 2500 | 0.195 | -269.162        | 579       | 2500 | 0.232 |
|                                     | <i>Cephalotes cordatus</i>     | 3                          | -519.627   | 244.491   | 2.434      | 0.0008 | -406.409      | 155       | 2500 | 0.062 | -418.231        | 198       | 2500 | 0.079 |
|                                     | <i>Cephalotes eduarduli</i>    | 3                          | -347.778   | 172.724   | 1.469      | 0.0004 | -270.047      | 302       | 2500 | 0.121 | -277.724        | 326       | 2500 | 0.130 |
|                                     | <i>Cephalotes grandinosus</i>  | 2                          | -180.157   | 67.228    | 1.124      | 0.0002 | -134.227      | 373       | 2500 | 0.149 | -137.867        | 433       | 2500 | 0.173 |
|                                     | <i>Cephalotes maculatus</i>    | 3                          | -325.496   | 153.944   | 1.219      | 0.0003 | -251.737      | 310       | 2500 | 0.124 | -259.979        | 331       | 2500 | 0.132 |
|                                     | <i>Cephalotes minutus</i>      | 5                          | -711.798   | 370.455   | 1.617      | 0.0005 | -560.912      | 146       | 2500 | 0.058 | -574.965        | 174       | 2500 | 0.070 |
|                                     | <i>Cephalotes pallens</i>      | 4                          | -552.848   | 283.021   | 1.580      | 0.0004 | -442.366      | 188       | 2500 | 0.075 | -451.291        | 257       | 2500 | 0.103 |
|                                     | <i>Cephalotes pallidoides</i>  | 3                          | -531.391   | 260.173   | 2.398      | 0.0008 | -412.903      | 147       | 2500 | 0.059 | -419.779        | 153       | 2500 | 0.061 |

|                       |                                  |     |            |          |         |        |             |      |      |       |            |      |      |       |
|-----------------------|----------------------------------|-----|------------|----------|---------|--------|-------------|------|------|-------|------------|------|------|-------|
|                       | <i>Cephalotes placidus</i>       | 11  | -1701.151  | 890.629  | 1.722   | 0.0005 | -1347.975   | 17   | 2500 | 0.007 | -1368.409  | 20   | 2500 | 0.008 |
|                       | <i>Cephalotes rohweri</i>        | 2   | -308.924   | 129.013  | 2.107   | 0.0005 | -240.626    | 278  | 2500 | 0.111 | -247.709   | 335  | 2500 | 0.134 |
|                       | <i>Cephalotes similimus</i>      | 2   | -277.110   | 113.033  | 2.006   | 0.0006 | -219.137    | 360  | 2500 | 0.144 | -227.517   | 413  | 2500 | 0.165 |
|                       | <i>Cephalotes spinosus</i>       | 3   | -413.778   | 187.586  | 1.603   | 0.0004 | -313.148    | 187  | 2500 | 0.075 | -320.572   | 213  | 2500 | 0.085 |
|                       | <i>Cephalotes targionii</i>      | 3   | -486.734   | 223.875  | 2.035   | 0.0006 | -365.214    | 107  | 2500 | 0.043 | -374.343   | 161  | 2500 | 0.064 |
|                       | <i>Cephalotes umbraculatus</i>   | 3   | -485.544   | 240.269  | 2.196   | 0.0007 | -386.281    | 220  | 2500 | 0.088 | -396.388   | 277  | 2500 | 0.111 |
|                       | <i>Cephalotes varians</i>        | 34  | -7972.271  | 3946.001 | 2.363   | 0.0007 | -6523.168   | 0    | 2500 | 0.000 | -6605.727  | 0    | 2500 | 0.000 |
|                       | <i>Choristoneura fumifera</i>    | 176 | -46232.489 | 1378.795 | 3.630   | 0.0003 | -51792.678  | 2500 | 2500 | 1.000 | -44514.809 | 48   | 2500 | 0.019 |
|                       | <i>Cimex lectularius</i>         | 4   | -199.150   | 20.035   | 0.806   | 0.0001 | -203.904    | 1359 | 2500 | 0.544 | -207.337   | 1423 | 2500 | 0.569 |
|                       | <i>Coleoptera</i>                | 3   | -14506.298 | 3042.877 | 151.264 | 0.0081 | -12231.512  | 0    | 2500 | 0.000 | -12667.046 | 0    | 2500 | 0.000 |
|                       | <i>Coptotermes formosanus</i>    | 12  | -28008.596 | 545.461  | 125.818 | 0.0023 | -38292.105  | 2500 | 2500 | 1.000 | -29225.675 | 2495 | 2500 | 0.998 |
|                       | <i>Cornitermes sp.</i>           | 3   | -19027.834 | 7826.446 | 78.270  | 0.0006 | -14634.611  | 0    | 2500 | 0.000 | -14931.264 | 0    | 2500 | 0.000 |
|                       | <i>Cubitermes ugandensis</i>     | 3   | -3787.050  | 1650.674 | 20.867  | 0.0016 | -2989.065   | 0    | 2500 | 0.000 | -3057.591  | 0    | 2500 | 0.000 |
|                       | <i>Delia radicum</i>             | 4   | -93.986    | 13.568   | 0.201   | 0.0000 | -69.303     | 579  | 2500 | 0.232 | -72.516    | 571  | 2500 | 0.228 |
|                       | <i>Drosophila melanogaster</i>   | 19  | -7779.501  | 1491.742 | 4.703   | 0.0002 | -7058.372   | 33   | 2500 | 0.013 | -7169.868  | 83   | 2500 | 0.033 |
|                       | <i>Echidnophaga</i>              | 8   | -557.559   | 7.530    | 9.300   | 0.0009 | -930.930    | 2452 | 2500 | 0.981 | -526.765   | 778  | 2500 | 0.311 |
|                       | <i>Formicidae</i>                | 2   | -1361.820  | 528.088  | 14.742  | 0.0009 | -1248.274   | 409  | 2500 | 0.164 | -1286.547  | 644  | 2500 | 0.258 |
|                       | <i>Gromphadorhina portentosa</i> | 2   | -5427.821  | 201.750  | 442.610 | 0.0079 | -5570.759   | 1843 | 2500 | 0.737 | -5349.884  | 642  | 2500 | 0.257 |
|                       | <i>Lucilia sericata</i>          | 2   | -649.514   | 180.379  | 5.256   | 0.0002 | -629.520    | 1028 | 2500 | 0.411 | -643.524   | 1173 | 2500 | 0.469 |
|                       | <i>Lymantria dispar</i>          | 9   | -6124.827  | 3589.778 | 11.244  | 0.0030 | -5052.574   | 1    | 2500 | 0.000 | -5133.041  | 0    | 2500 | 0.000 |
|                       | <i>Manduca quinque maculata</i>  | 7   | -7514.000  | 3202.455 | 19.783  | 0.0008 | -6440.852   | 1    | 2500 | 0.000 | -6604.463  | 3    | 2500 | 0.001 |
|                       | <i>Manduca sexta</i>             | 2   | -460.239   | 173.331  | 2.048   | 0.0000 | -373.385    | 344  | 2500 | 0.138 | -384.501   | 395  | 2500 | 0.158 |
|                       | <i>Mantis religiosa</i>          | 2   | -491.701   | 252.571  | 3.013   | 0.0001 | -463.096    | 872  | 2500 | 0.349 | -471.698   | 1020 | 2500 | 0.408 |
|                       | <i>Microcerotermes parvus</i>    | 3   | -10829.835 | 4625.309 | 40.882  | 0.0004 | -8422.173   | 0    | 2500 | 0.000 | -8583.619  | 0    | 2500 | 0.000 |
|                       | <i>Musca domestica</i>           | 15  | -3261.433  | 22.863   | 8.770   | 0.0004 | -3331.885   | 1446 | 2500 | 0.578 | -3204.500  | 823  | 2500 | 0.329 |
|                       | <i>Nasutitermes corniger</i>     | 3   | -6804.373  | 3288.272 | 40.960  | 0.0026 | -5376.676   | 0    | 2500 | 0.000 | -5495.082  | 0    | 2500 | 0.000 |
|                       | <i>Neocapritermes taracua</i>    | 3   | -6686.489  | 2959.501 | 31.616  | 0.0011 | -5185.068   | 0    | 2500 | 0.000 | -5296.201  | 0    | 2500 | 0.000 |
|                       | <i>Odonata</i>                   | 2   | -1108.837  | 253.633  | 13.464  | 0.0019 | -992.800    | 273  | 2500 | 0.109 | -1028.666  | 458  | 2500 | 0.183 |
|                       | <i>Odontotermes formosanus</i>   | 12  | -46275.174 | 615.489  | 271.795 | 0.0055 | -52317.257  | 2500 | 2500 | 1.000 | -45386.664 | 56   | 2500 | 0.022 |
|                       | <i>Ophiotermes sp.</i>           | 3   | -5312.750  | 2395.304 | 30.667  | 0.0020 | -4192.400   | 0    | 2500 | 0.000 | -4293.986  | 0    | 2500 | 0.000 |
|                       | <i>Promicrotermes sp.</i>        | 3   | -6541.175  | 2821.676 | 29.276  | 0.0008 | -5059.175   | 0    | 2500 | 0.000 | -5148.122  | 0    | 2500 | 0.000 |
|                       | <i>Pyrrhocoroidea</i>            | 16  | -4390.667  | 2124.771 | 2.414   | 0.0002 | -3517.522   | 0    | 2500 | 0.000 | -3561.926  | 2    | 2500 | 0.001 |
|                       | <i>Rhagium mordax</i>            | 2   | -4947.855  | 1146.712 | 46.281  | 0.0013 | -3877.566   | 0    | 2500 | 0.000 | -4012.303  | 0    | 2500 | 0.000 |
|                       | <i>Subpsaltria yangi</i>         | 37  | -52886.029 | 1268.154 | 45.490  | 0.0009 | -79286.301  | 2500 | 2500 | 1.000 | -57572.006 | 2500 | 2500 | 1.000 |
|                       | <i>Tenebrio molitor</i>          | 4   | -3836.728  | 111.381  | 31.290  | 0.0006 | -3654.594   | 478  | 2500 | 0.191 | -3649.500  | 238  | 2500 | 0.095 |
|                       | <i>Termes hospes</i>             | 3   | -8529.971  | 3605.315 | 36.205  | 0.0007 | -6542.098   | 0    | 2500 | 0.000 | -6682.769  | 0    | 2500 | 0.000 |
|                       | <i>Trinervitermes sp.</i>        | 3   | -2564.674  | 1194.085 | 14.269  | 0.0021 | -1989.654   | 0    | 2500 | 0.000 | -2038.395  | 0    | 2500 | 0.000 |
|                       | <i>Trybliographa rapae</i>       | 4   | -568.212   | 75.949   | 2.362   | 0.0005 | -480.431    | 293  | 2500 | 0.117 | -496.073   | 385  | 2500 | 0.154 |
|                       | Passing rate (%)                 |     |            |          |         |        |             |      |      | 65.6  |            |      |      | 60.6  |
| <i>Chondrichthyes</i> | <i>Carcharhinus leucas</i>       | 9   | -12925.714 | 3375.831 | 21.475  | 0.0004 | -11690.034  | 5    | 2500 | 0.002 | -11928.748 | 14   | 2500 | 0.006 |
|                       | <i>Carcharhinus plumbeus</i>     | 12  | -11094.072 | 1469.066 | 21.713  | 0.0012 | -10244.964  | 19   | 2500 | 0.008 | -10390.335 | 36   | 2500 | 0.014 |
|                       | <i>Galeocerdo cuvier</i>         | 4   | -1426.352  | 61.344   | 7.439   | 0.0002 | -1393.327   | 990  | 2500 | 0.396 | -1385.245  | 868  | 2500 | 0.347 |
|                       | <i>Leucoraja ocellata</i>        | 2   | -5168.096  | 716.169  | 91.207  | 0.0022 | -4775.815   | 55   | 2500 | 0.022 | -4943.471  | 266  | 2500 | 0.106 |
|                       | <i>Negaprion brevirostris</i>    | 5   | -2379.134  | 201.916  | 11.594  | 0.0004 | -2347.793   | 1040 | 2500 | 0.416 | -2352.605  | 1049 | 2500 | 0.420 |
|                       | #Passing rate (%)                |     |            |          |         |        |             |      |      |       | 40         |      |      |       |
| <i>Actinopteri</i>    | <i>Astyanax paranae</i>          | 9   | -12248.045 | 456.459  | 124.644 | 0.0196 | -14901.852  | 2500 | 2500 | 1.000 | -12118.026 | 719  | 2500 | 0.288 |
|                       | <i>Aulonocranus dewindti</i>     | 5   | -10516.821 | 1996.946 | 48.057  | 0.0027 | -8669.301   | 0    | 2500 | 0.000 | -8933.019  | 0    | 2500 | 0.000 |
|                       | <i>Carassius auratus</i>         | 5   | -1982.982  | 438.183  | 2.769   | 0.0000 | -1538.799   | 9    | 2500 | 0.004 | -1570.390  | 15   | 2500 | 0.006 |
|                       | <i>Coreius guichenoti</i>        | 30  | -10119.722 | 579.103  | 3.736   | 0.0002 | -8763.351   | 0    | 2500 | 0.000 | -8786.530  | 0    | 2500 | 0.000 |
|                       | <i>Ctenochromis horei</i>        | 4   | -9670.509  | 1011.052 | 75.541  | 0.0043 | -8218.209   | 0    | 2500 | 0.000 | -8421.362  | 0    | 2500 | 0.000 |
|                       | <i>Ctenopharyngodon idella</i>   | 108 | -81653.167 | 247.606  | 24.483  | 0.0006 | -109679.939 | 2500 | 2500 | 1.000 | -84232.364 | 2499 | 2500 | 1.000 |
|                       | <i>Cyprichromis coloratus</i>    | 3   | -6570.274  | 651.684  | 74.276  | 0.0042 | -5843.273   | 0    | 2500 | 0.000 | -5914.633  | 0    | 2500 | 0.000 |

|                   |                                     |     |             |           |         |        |             |      |      |       |             |      |      |       |
|-------------------|-------------------------------------|-----|-------------|-----------|---------|--------|-------------|------|------|-------|-------------|------|------|-------|
|                   | <i>Eretmodus_cyanostictus</i>       | 5   | -11020.910  | 1322.302  | 57.802  | 0.0033 | -9389.344   | 0    | 2500 | 0.000 | -9592.796   | 0    | 2500 | 0.000 |
|                   | <i>Gthochromis_pfefferi</i>         | 2   | -4655.112   | 456.339   | 92.104  | 0.0049 | -3952.028   | 0    | 2500 | 0.000 | -4076.744   | 0    | 2500 | 0.000 |
|                   | <i>Huso_dauricus</i>                | 5   | -1217.411   | 64.039    | 6.087   | 0.0001 | -1567.705   | 2472 | 2500 | 0.989 | -1361.780   | 2251 | 2500 | 0.900 |
|                   | <i>Interochromis_loocki</i>         | 5   | -23708.820  | 1940.774  | 156.366 | 0.0056 | -21506.119  | 0    | 2500 | 0.000 | -21475.276  | 0    | 2500 | 0.000 |
|                   | <i>Julidochromis_ornatus</i>        | 5   | -21688.081  | 1040.544  | 220.830 | 0.0064 | -22736.638  | 2480 | 2500 | 0.992 | -20640.170  | 2    | 2500 | 0.001 |
|                   | <i>Konia_dikume</i>                 | 3   | -6333.121   | 337.159   | 145.573 | 0.0072 | -6288.999   | 1031 | 2500 | 0.412 | -6021.591   | 39   | 2500 | 0.016 |
|                   | <i>Konia_eisentrauti</i>            | 4   | -3164.846   | 83.192    | 107.325 | 0.0062 | -3652.262   | 2479 | 2500 | 0.992 | -3110.781   | 732  | 2500 | 0.293 |
|                   | <i>Lamprologus_lemairii</i>         | 4   | -2103.000   | 213.668   | 12.967  | 0.0018 | -1877.672   | 112  | 2500 | 0.045 | -1897.300   | 105  | 2500 | 0.042 |
|                   | <i>Lepidolamprologus_attenuatus</i> | 5   | -5205.807   | 331.274   | 33.644  | 0.0015 | -5050.288   | 555  | 2500 | 0.222 | -4973.328   | 254  | 2500 | 0.102 |
|                   | <i>Lepidolamprologus_elongatus</i>  | 3   | -3320.857   | 257.116   | 35.376  | 0.0017 | -3007.324   | 74   | 2500 | 0.030 | -3073.649   | 109  | 2500 | 0.044 |
|                   | <i>Myaka_myaka</i>                  | 4   | -5792.387   | 379.621   | 64.610  | 0.0049 | -5508.395   | 229  | 2500 | 0.092 | -5426.726   | 42   | 2500 | 0.017 |
|                   | <i>Neolamprologus_fasciatus</i>     | 5   | -4377.769   | 372.476   | 20.390  | 0.0012 | -4085.491   | 202  | 2500 | 0.081 | -4109.272   | 180  | 2500 | 0.072 |
|                   | <i>Neolamprologus_pulcher</i>       | 5   | -17571.363  | 1290.380  | 125.762 | 0.0051 | -16797.902  | 26   | 2500 | 0.010 | -16439.385  | 0    | 2500 | 0.000 |
|                   | <i>Neolamprologus_savoryi</i>       | 4   | -12006.378  | 954.710   | 106.313 | 0.0050 | -10995.423  | 0    | 2500 | 0.000 | -10934.250  | 0    | 2500 | 0.000 |
|                   | <i>Oncorhynchus_mykiss</i>          | 110 | -136897.673 | 5598.142  | 24.380  | 0.0041 | -130312.081 | 0    | 2500 | 0.000 | -124911.448 | 0    | 2500 | 0.000 |
|                   | <i>Ophthalmotilapia_ventralis</i>   | 3   | -13641.592  | 1073.349  | 185.766 | 0.0062 | -12101.649  | 0    | 2500 | 0.000 | -12256.123  | 0    | 2500 | 0.000 |
|                   | <i>Oreochromis_niloticus</i>        | 27  | -43784.659  | 5073.673  | 26.013  | 0.0011 | -38377.480  | 0    | 2500 | 0.000 | -38754.979  | 0    | 2500 | 0.000 |
|                   | <i>Perca_fluviatilis</i>            | 145 | -28452.799  | 7632.169  | 1.525   | 0.0003 | -23049.199  | 0    | 2500 | 0.000 | -23395.699  | 0    | 2500 | 0.000 |
|                   | <i>Plecodus_straeleni</i>           | 3   | -2198.606   | 144.227   | 23.868  | 0.0007 | -2389.060   | 2239 | 2500 | 0.896 | -2226.091   | 1508 | 2500 | 0.603 |
|                   | <i>Poecilia_reticulata</i>          | 48  | -17506.133  | 1074.079  | 12.359  | 0.0033 | -17426.462  | 1039 | 2500 | 0.416 | -16992.602  | 206  | 2500 | 0.082 |
|                   | <i>Pomacentrus_chrysurus</i>        | 3   | -241.865    | 8.728     | 9.540   | 0.0022 | -299.545    | 2087 | 2500 | 0.835 | -240.243    | 1203 | 2500 | 0.481 |
|                   | <i>Pomacentrus_moluccensis</i>      | 3   | -1164.851   | 432.569   | 6.842   | 0.0008 | -1007.769   | 202  | 2500 | 0.081 | -1043.587   | 290  | 2500 | 0.116 |
|                   | <i>Pomacentrus_unknown</i>          | 4   | -458.099    | 21.984    | 1.992   | 0.0001 | -437.010    | 977  | 2500 | 0.391 | -430.850    | 799  | 2500 | 0.320 |
|                   | <i>Prionotus_carolinus</i>          | 2   | -10453.072  | 4284.542  | 110.182 | 0.0022 | -9129.666   | 1    | 2500 | 0.000 | -9382.966   | 1    | 2500 | 0.000 |
|                   | <i>Pungu_maclareni</i>              | 5   | -4747.272   | 140.720   | 62.766  | 0.0041 | -5220.805   | 2424 | 2500 | 0.970 | -4627.809   | 503  | 2500 | 0.201 |
|                   | <i>Salmo_trutta</i>                 | 61  | -49602.480  | 1188.374  | 40.652  | 0.0048 | -87907.624  | 2500 | 2500 | 1.000 | -50240.811  | 2059 | 2500 | 0.824 |
|                   | <i>Sarotherodon_caroli</i>          | 4   | -4934.135   | 145.649   | 124.804 | 0.0072 | -5547.827   | 2489 | 2500 | 0.996 | -4735.445   | 176  | 2500 | 0.070 |
|                   | <i>Sarotherodon_linnellii</i>       | 5   | -5540.943   | 142.200   | 117.804 | 0.0075 | -6622.420   | 2500 | 2500 | 1.000 | -5417.730   | 488  | 2500 | 0.195 |
|                   | <i>Sarotherodon_lohbergeri</i>      | 3   | -4442.996   | 453.309   | 44.580  | 0.0025 | -3942.582   | 10   | 2500 | 0.004 | -4017.712   | 7    | 2500 | 0.003 |
|                   | <i>Sarotherodon_steinbachi</i>      | 5   | -16381.395  | 1828.899  | 94.904  | 0.0049 | -14662.698  | 0    | 2500 | 0.000 | -14768.350  | 0    | 2500 | 0.000 |
|                   | <i>Siganus_fuscescens</i>           | 11  | -4277.092   | 76.909    | 31.921  | 0.0049 | -5547.370   | 2500 | 2500 | 1.000 | -4069.548   | 198  | 2500 | 0.079 |
|                   | <i>Simochromis_babaulti</i>         | 2   | -4665.531   | 341.679   | 128.264 | 0.0067 | -4048.882   | 0    | 2500 | 0.000 | -4155.250   | 0    | 2500 | 0.000 |
|                   | <i>Siniperca_chuatsi</i>            | 41  | -51942.020  | 1622.108  | 29.491  | 0.0015 | -57283.625  | 2500 | 2500 | 1.000 | -51961.936  | 1278 | 2500 | 0.511 |
|                   | <i>Stomatepia_mariae</i>            | 4   | -3437.701   | 129.073   | 56.440  | 0.0030 | -3473.689   | 1448 | 2500 | 0.579 | -3316.118   | 415  | 2500 | 0.166 |
|                   | <i>Stomatepia_pindu</i>             | 5   | -4460.753   | 101.484   | 69.229  | 0.0043 | -4437.990   | 1153 | 2500 | 0.461 | -4265.818   | 151  | 2500 | 0.060 |
|                   | <i>Variabilichromis_moorii</i>      | 2   | -9445.104   | 777.532   | 277.412 | 0.0090 | -8476.178   | 0    | 2500 | 0.000 | -8662.511   | 0    | 2500 | 0.000 |
|                   | <i>Xenotilapia_melanogenys</i>      | 2   | -2375.668   | 184.994   | 49.999  | 0.0021 | -2350.636   | 1080 | 2500 | 0.432 | -2318.546   | 785  | 2500 | 0.314 |
|                   | <i>Xenotilapia_spiloptera</i>       | 5   | -14336.263  | 1240.326  | 90.594  | 0.0051 | -12961.080  | 0    | 2500 | 0.000 | -12977.407  | 0    | 2500 | 0.000 |
|                   | #Passing rate (%)                   |     |             |           |         |        |             |      |      | 51.1  |             |      |      | 44.4  |
| <i>Amphibia</i>   | <i>Dendropsophus_minutus</i>        | 2   | -603.252    | 44.304    | 23.397  | 0.0075 | -581.965    | 937  | 2500 | 0.375 | -568.196    | 637  | 2500 | 0.255 |
|                   | <i>Fejervarya_limnocharis</i>       | 6   | -10751.177  | 6789.271  | 39.151  | 0.0074 | -8941.362   | 0    | 2500 | 0.000 | -9104.423   | 0    | 2500 | 0.000 |
|                   | <i>Scix_fuscovarius</i>             | 13  | -20619.041  | 694.202   | 127.130 | 0.0124 | -24733.771  | 2500 | 2500 | 1.000 | -20492.026  | 850  | 2500 | 0.340 |
|                   | #Passing rate (%)                   |     |             |           |         |        |             |      |      | 66.7  |             |      |      | 66.7  |
| <i>Sauropsida</i> | <i>Chelonia_mydas</i>               | 24  | -29889.049  | 13120.572 | 9.661   | 0.0002 | -23297.323  | 0    | 2500 | 0.000 | -23579.473  | 0    | 2500 | 0.000 |
|                   | <i>Lampropeltis_triangulum</i>      | 2   | -1294.627   | 622.988   | 9.480   | 0.0004 | -1104.020   | 103  | 2500 | 0.041 | -1127.140   | 199  | 2500 | 0.080 |
|                   | <i>Liolaemus_parvus</i>             | 88  | -186500.243 | 3767.292  | 52.280  | 0.0021 | -221616.012 | 2500 | 2500 | 1.000 | -188227.283 | 2255 | 2500 | 0.902 |
|                   | <i>Liolaemus_ruibali</i>            | 96  | -189421.024 | 4359.188  | 41.154  | 0.0018 | -208365.593 | 2500 | 2500 | 1.000 | -189344.183 | 1191 | 2500 | 0.476 |
|                   | <i>Pantherophis_obsoletus</i>       | 4   | -2577.903   | 1418.027  | 9.363   | 0.0006 | -2183.017   | 25   | 2500 | 0.010 | -2220.996   | 52   | 2500 | 0.021 |
|                   | <i>Phymaturus_williamsi</i>         | 57  | -144675.474 | 3037.905  | 75.248  | 0.0025 | -179072.361 | 2500 | 2500 | 1.000 | -146961.792 | 2454 | 2500 | 0.982 |
|                   | <i>Pogona_barbata</i>               | 3   | -5756.488   | 2894.730  | 30.218  | 0.0010 | -4798.758   | 0    | 2500 | 0.000 | -4891.243   | 0    | 2500 | 0.000 |
|                   | <i>Sauromalus_ater</i>              | 2   | -1948.046   | 652.552   | 15.215  | 0.0005 | -1622.410   | 36   | 2500 | 0.014 | -1674.120   | 51   | 2500 | 0.020 |
|                   | <i>Varanus_komodoensis</i>          | 24  | -24908.529  | 541.395   | 21.780  | 0.0005 | -27525.895  | 2500 | 2500 | 1.000 | -24776.405  | 953  | 2500 | 0.381 |

|                             |                                   |            |             |           |          |           |             |      |       |           |             |      |       |       |
|-----------------------------|-----------------------------------|------------|-------------|-----------|----------|-----------|-------------|------|-------|-----------|-------------|------|-------|-------|
|                             | <i>Varanus olivaceus</i>          | 4          | -10197.332  | 412.694   | 191.597  | 0.0035    | -11998.810  | 2500 | 2500  | 1.000     | -10403.983  | 2079 | 2500  | 0.832 |
|                             | Passing rate (%)                  |            |             |           |          |           |             |      |       | 50        |             |      |       | 60    |
| Aves                        | <i>Anser cygnoides</i>            | 18         | -54815.204  | 7662.009  | 46.117   | 0.0019    | -45426.501  | 0    | 2500  | 0.000     | -46208.573  | 0    | 2500  | 0.000 |
|                             | <i>Bubo bubo</i>                  | 3          | -1834.299   | 53.901    | 168.357  | 0.0114    | -2085.401   | 2347 | 2500  | 0.939     | -1782.819   | 644  | 2500  | 0.258 |
|                             | <i>Buteo jamaicensis</i>          | 3          | -3697.315   | 1099.744  | 25.162   | 0.0009    | -3198.139   | 6    | 2500  | 0.002     | -3285.812   | 28   | 2500  | 0.011 |
|                             | <i>Chiroxiphia lanceolata</i>     | 9          | -19947.448  | 937.590   | 35.894   | 0.0003    | -19657.065  | 689  | 2500  | 0.276     | -18450.940  | 0    | 2500  | 0.000 |
|                             | <i>Chroicocephalus ridibundus</i> | 86         | -68334.318  | 1614.235  | 22.981   | 0.0010    | -109775.098 | 2500 | 2500  | 1.000     | -72749.620  | 2500 | 2500  | 1.000 |
|                             | <i>Columbi passerina</i>          | 39         | -73639.271  | 2650.745  | 28.665   | 0.0004    | -74416.529  | 1924 | 2500  | 0.770     | -69617.038  | 0    | 2500  | 0.000 |
|                             | <i>Columbi talpacoti</i>          | 24         | -24503.741  | 1024.912  | 16.209   | 0.0004    | -24432.553  | 1120 | 2500  | 0.448     | -23316.109  | 28   | 2500  | 0.011 |
|                             | <i>Duck</i>                       | 3          | -3531.042   | 1573.842  | 20.166   | 0.0012    | -2938.191   | 1    | 2500  | 0.000     | -3007.323   | 5    | 2500  | 0.002 |
|                             | <i>Eudiptula minor</i>            | 2          | -855.721    | 371.464   | 9.324    | 0.0040    | -665.099    | 35   | 2500  | 0.014     | -683.769    | 43   | 2500  | 0.017 |
|                             | <i>Haliaeetus leucocephalus</i>   | 2          | -1935.166   | 885.937   | 14.861   | 0.0005    | -1649.758   | 80   | 2500  | 0.032     | -1688.969   | 109  | 2500  | 0.044 |
|                             | <i>Hirundo rustica</i>            | 17         | -21355.373  | 1804.645  | 23.538   | 0.0013    | -20530.066  | 123  | 2500  | 0.049     | -20250.764  | 18   | 2500  | 0.007 |
|                             | <i>Melospiza undulatus</i>        | 14         | -6903.044   | 129.163   | 13.571   | 0.0007    | -7531.831   | 2424 | 2500  | 0.970     | -6624.538   | 279  | 2500  | 0.112 |
|                             | <i>Nymphicus hollandicus</i>      | 6          | -4210.213   | 584.181   | 10.148   | 0.0003    | -3609.458   | 2    | 2500  | 0.001     | -3689.638   | 17   | 2500  | 0.007 |
|                             | <i>Peafowl</i>                    | 3          | -2167.843   | 972.238   | 11.978   | 0.0008    | -1858.477   | 43   | 2500  | 0.017     | -1903.162   | 92   | 2500  | 0.037 |
|                             | <i>Penguin</i>                    | 4          | -1463.357   | 752.334   | 4.729    | 0.0003    | -1176.187   | 37   | 2500  | 0.015     | -1196.966   | 52   | 2500  | 0.021 |
|                             | <i>Phoenicopterus chilensis</i>   | 2          | -1286.742   | 27.790    | 2084.660 | 0.1528    | -1098.612   | 117  | 2500  | 0.047     | -1391.199   | 2500 | 2500  | 1.000 |
|                             | <i>Puffinus tenuirostris</i>      | 4          | -824.598    | 443.328   | 2.642    | 0.0006    | -682.124    | 170  | 2500  | 0.068     | -695.617    | 217  | 2500  | 0.087 |
|                             | <i>Ramphocelus carbo</i>          | 8          | -6609.274   | 656.459   | 13.237   | 0.0004    | -6114.571   | 81   | 2500  | 0.032     | -6161.177   | 82   | 2500  | 0.033 |
|                             | <i>Saltator maximus</i>           | 11         | -9616.925   | 910.145   | 14.072   | 0.0005    | -8806.613   | 9    | 2500  | 0.004     | -8825.714   | 10   | 2500  | 0.004 |
|                             | <i>Sarcoramphus papa</i>          | 2          | -1602.316   | 750.461   | 11.632   | 0.0003    | -1350.533   | 68   | 2500  | 0.027     | -1377.965   | 124  | 2500  | 0.050 |
|                             | <i>Serinus caria</i>              | 6          | -3961.490   | 381.945   | 11.093   | 0.0004    | -3593.688   | 82   | 2500  | 0.033     | -3579.267   | 71   | 2500  | 0.028 |
|                             | <i>Strigops habroptilus</i>       | 28         | -7902.316   | 3815.365  | 3.573    | 0.0013    | -6477.441   | 0    | 2500  | 0.000     | -6584.832   | 1    | 2500  | 0.000 |
|                             | <i>Struthio camelus</i>           | 167        | -259559.842 | 2280.352  | 35.852   | 0.0025    | -275626.318 | 2500 | 2500  | 1.000     | -243711.421 | 0    | 2500  | 0.000 |
|                             | <i>Tangara palmarum</i>           | 3          | -6451.989   | 436.968   | 40.242   | 0.0003    | -5829.965   | 14   | 2500  | 0.006     | -5771.360   | 0    | 2500  | 0.000 |
|                             | <i>Thraupis gauocolpa</i>         | 8          | -15505.748  | 864.002   | 29.141   | 0.0002    | -14904.441  | 194  | 2500  | 0.078     | -14419.783  | 7    | 2500  | 0.003 |
|                             | <i>Turdus flavipes</i>            | 6          | -5078.193   | 672.482   | 14.080   | 0.0005    | -4487.083   | 11   | 2500  | 0.004     | -4572.876   | 20   | 2500  | 0.008 |
|                             | <i>Turdus olivater</i>            | 6          | -4255.106   | 467.759   | 12.092   | 0.0003    | -3852.124   | 66   | 2500  | 0.026     | -3915.021   | 131  | 2500  | 0.052 |
|                             | <i>Urocolius macrourus</i>        | 3          | -1171.253   | 584.601   | 7.102    | 0.0003    | -963.031    | 78   | 2500  | 0.031     | -993.036    | 165  | 2500  | 0.066 |
| <i>Zonotrichia capensis</i> | 6                                 | -10492.714 | 942.705     | 33.378    | 0.0011   | -9376.971 | 2           | 2500 | 0.001 | -9383.615 | 0           | 2500 | 0.000 |       |
|                             | #Passing rate (%)                 |            |             |           |          |           |             |      |       | 31.0      |             |      |       | 24.1  |
| Mammalia                    | <i>Acinonyx jubatus</i>           | 67         | -40297.783  | 658.109   | 8.442    | 0.0005    | -38539.822  | 24   | 2500  | 0.010     | -35297.133  | 0    | 2500  | 0.000 |
|                             | <i>Aepyceros melampus</i>         | 6          | -49299.335  | 3822.700  | 158.301  | 0.0012    | -42756.479  | 0    | 2500  | 0.000     | -43408.075  | 0    | 2500  | 0.000 |
|                             | <i>Ailuropoda melanoleuca</i>     | 11         | -4891.561   | 2407.390  | 5.821    | 0.0005    | -4063.482   | 2    | 2500  | 0.001     | -4134.376   | 3    | 2500  | 0.001 |
|                             | <i>Ailurus fulgens</i>            | 5          | -2510.350   | 356.353   | 5.689    | 0.0001    | -2214.982   | 127  | 2500  | 0.051     | -2265.378   | 181  | 2500  | 0.072 |
|                             | <i>Alces alces</i>                | 7          | -18577.783  | 7087.036  | 39.840   | 0.0010    | -16071.654  | 0    | 2500  | 0.000     | -16361.222  | 0    | 2500  | 0.000 |
|                             | <i>Antidorcas marsupialis</i>     | 8          | -70140.362  | 3628.581  | 205.800  | 0.0017    | -63545.517  | 0    | 2500  | 0.000     | -64324.900  | 0    | 2500  | 0.000 |
|                             | <i>Arctictis binturong</i>        | 2          | -925.975    | 417.172   | 6.066    | 0.0002    | -767.412    | 159  | 2500  | 0.064     | -785.374    | 226  | 2500  | 0.090 |
|                             | <i>Arctocephalus australis</i>    | 6          | -6000.796   | 175.842   | 22.868   | 0.0002    | -6252.671   | 2013 | 2500  | 0.805     | -5711.914   | 221  | 2500  | 0.088 |
|                             | <i>Arctocephalus tropicalis</i>   | 4          | -4060.864   | 143.014   | 22.820   | 0.0002    | -3967.251   | 842  | 2500  | 0.337     | -3819.113   | 181  | 2500  | 0.072 |
|                             | <i>Armadillo</i>                  | 2          | -1471.993   | 553.236   | 10.327   | 0.0003    | -1231.545   | 77   | 2500  | 0.031     | -1262.609   | 98   | 2500  | 0.039 |
|                             | <i>Bison bison</i>                | 7          | -24246.873  | 15197.688 | 79.678   | 0.0110    | -19682.025  | 0    | 2500  | 0.000     | -20071.721  | 0    | 2500  | 0.000 |
|                             | <i>Bos indicus</i>                | 9          | -10194.779  | 6241.378  | 23.627   | 0.0079    | -8320.283   | 0    | 2500  | 0.000     | -8475.514   | 0    | 2500  | 0.000 |
|                             | <i>Bos taurus</i>                 | 105        | -329138.147 | 36670.364 | 59.313   | 0.0054    | -289728.898 | 0    | 2500  | 0.000     | -294876.671 | 0    | 2500  | 0.000 |
|                             | <i>Bubalus bubalis</i>            | 2          | -2588.704   | 1386.158  | 39.361   | 0.0124    | -2054.234   | 0    | 2500  | 0.000     | -2126.455   | 1    | 2500  | 0.000 |
|                             | <i>Canis latrans</i>              | 80         | -135006.091 | 3420.734  | 22.524   | 0.0003    | -135981.377 | 1878 | 2500  | 0.751     | -132238.188 | 39   | 2500  | 0.016 |
|                             | <i>Canis mesomelas</i>            | 50         | -21292.313  | 1239.574  | 5.033    | 0.0006    | -18542.309  | 0    | 2500  | 0.000     | -18355.354  | 0    | 2500  | 0.000 |
|                             | <i>Capreolus capreolus</i>        | 2          | -2314.409   | 1169.569  | 33.649   | 0.0110    | -1819.177   | 0    | 2500  | 0.000     | -1880.530   | 1    | 2500  | 0.000 |
|                             | <i>Castor canadensis</i>          | 3          | -1920.368   | 342.153   | 14.869   | 0.0011    | -1571.907   | 5    | 2500  | 0.002     | -1633.556   | 23   | 2500  | 0.009 |
|                             | <i>Cavia porcellus</i>            | 7          | -27473.487  | 9140.923  | 73.060   | 0.0023    | -23105.741  | 0    | 2500  | 0.000     | -23678.125  | 0    | 2500  | 0.000 |
|                             | <i>Cebus capucinus</i>            | 49         | -7760.039   | 3410.876  | 1.093    | 0.0001    | -6259.923   | 0    | 2500  | 0.000     | -6327.927   | 0    | 2500  | 0.000 |

|                                  |     |             |            |         |        |             |      |      |       |             |      |      |       |
|----------------------------------|-----|-------------|------------|---------|--------|-------------|------|------|-------|-------------|------|------|-------|
| <i>Ceratotherium simum</i>       | 7   | -38879.162  | 3185.253   | 106.482 | 0.0012 | -34565.415  | 0    | 2500 | 0.000 | -35621.293  | 0    | 2500 | 0.000 |
| <i>Cercocebus atys</i>           | 2   | -8699.388   | 1259.199   | 157.893 | 0.0056 | -7408.382   | 0    | 2500 | 0.000 | -7709.474   | 0    | 2500 | 0.000 |
| <i>Cervus elaphus</i>            | 12  | -34731.262  | 12155.918  | 49.974  | 0.0020 | -29544.464  | 0    | 2500 | 0.000 | -30205.338  | 0    | 2500 | 0.000 |
| <i>Chaetophractus vellerosus</i> | 3   | -4506.644   | 197.343    | 74.437  | 0.0032 | -4253.002   | 244  | 2500 | 0.098 | -4286.205   | 122  | 2500 | 0.049 |
| <i>Chinchilla brevicaudatus</i>  | 2   | -3287.966   | 494.261    | 45.622  | 0.0010 | -2851.086   | 3    | 2500 | 0.001 | -2971.251   | 27   | 2500 | 0.011 |
| <i>Choloepus didactylus</i>      | 3   | -5939.303   | 379.887    | 73.000  | 0.0026 | -5558.603   | 93   | 2500 | 0.037 | -5575.702   | 52   | 2500 | 0.021 |
| <i>Choloepus hoffmanni</i>       | 4   | -5954.530   | 198.839    | 80.204  | 0.0034 | -5855.557   | 876  | 2500 | 0.350 | -5755.250   | 237  | 2500 | 0.095 |
| <i>Choloepus</i>                 | 2   | -4337.903   | 117.954    | 436.250 | 0.0053 | -4320.125   | 1166 | 2500 | 0.466 | -4203.156   | 229  | 2500 | 0.092 |
| <i>Colobus guereza</i>           | 4   | -10197.024  | 376.156    | 113.408 | 0.0027 | -9876.063   | 391  | 2500 | 0.156 | -9698.447   | 22   | 2500 | 0.009 |
| <i>Connochaetes taurinus</i>     | 7   | -57373.246  | 4769.275   | 161.714 | 0.0013 | -49563.624  | 0    | 2500 | 0.000 | -50845.027  | 0    | 2500 | 0.000 |
| <i>Dasypus novemcinctus</i>      | 12  | -24197.040  | 670.450    | 75.195  | 0.0039 | -25868.840  | 2500 | 2500 | 1.000 | -23540.139  | 94   | 2500 | 0.038 |
| <i>Diceros bicornis</i>          | 4   | -27590.855  | 1818.317   | 166.507 | 0.0013 | -24455.178  | 0    | 2500 | 0.000 | -25044.100  | 0    | 2500 | 0.000 |
| <i>Didelphis virginiana</i>      | 4   | -5049.090   | 2144.199   | 21.124  | 0.0012 | -4171.751   | 0    | 2500 | 0.000 | -4279.737   | 0    | 2500 | 0.000 |
| <i>Dipodomys ordii</i>           | 6   | -41248.223  | 11468.386  | 115.972 | 0.0018 | -35177.105  | 0    | 2500 | 0.000 | -36017.246  | 0    | 2500 | 0.000 |
| <i>Dolichotis patagonum</i>      | 3   | -4978.344   | 1794.135   | 32.199  | 0.0016 | -4095.262   | 0    | 2500 | 0.000 | -4219.565   | 0    | 2500 | 0.000 |
| <i>Echinops telfairi</i>         | 8   | -3714.937   | 1490.517   | 5.961   | 0.0003 | -3108.725   | 5    | 2500 | 0.002 | -3164.350   | 16   | 2500 | 0.006 |
| <i>Equus caballus</i>            | 44  | -175452.380 | 3998.540   | 136.654 | 0.0069 | -180853.842 | 2500 | 2500 | 1.000 | -167357.042 | 0    | 2500 | 0.000 |
| <i>Erethizon dorsatum</i>        | 2   | -1028.358   | 103.716    | 28.572  | 0.0038 | -869.426    | 65   | 2500 | 0.026 | -915.248    | 130  | 2500 | 0.052 |
| <i>Eubalaena glacialis</i>       | 3   | -14262.712  | 391.144    | 232.533 | 0.0006 | -14911.960  | 2317 | 2500 | 0.927 | -13546.238  | 8    | 2500 | 0.003 |
| <i>Eulemur mongoz</i>            | 3   | -3531.613   | 1530.718   | 19.320  | 0.0008 | -2999.990   | 8    | 2500 | 0.003 | -3070.632   | 27   | 2500 | 0.011 |
| <i>Euphractus sexcinctus</i>     | 4   | -6017.996   | 233.764    | 65.550  | 0.0030 | -5649.560   | 127  | 2500 | 0.051 | -5701.527   | 62   | 2500 | 0.025 |
| <i>Gerbillus gerbillus</i>       | 3   | -4536.083   | 124.374    | 386.491 | 0.0183 | -4914.058   | 2351 | 2500 | 0.940 | -4308.773   | 42   | 2500 | 0.017 |
| <i>Giraffa camelopardalis</i>    | 6   | -47615.630  | 3546.084   | 166.065 | 0.0015 | -42051.467  | 0    | 2500 | 0.000 | -42630.373  | 0    | 2500 | 0.000 |
| <i>Gorilla gorilla</i>           | 10  | -40700.364  | 4263.991   | 75.200  | 0.0017 | -36249.634  | 0    | 2500 | 0.000 | -37116.663  | 0    | 2500 | 0.000 |
| <i>Hipposideros armiger</i>      | 18  | -13505.681  | 426.048    | 22.403  | 0.0031 | -14255.201  | 2436 | 2500 | 0.974 | -13185.207  | 333  | 2500 | 0.133 |
| <i>Homo sapiens</i>              | 23  | -46469.034  | 1679.352   | 35.772  | 0.0009 | -43649.342  | 0    | 2500 | 0.000 | -42993.236  | 0    | 2500 | 0.000 |
| <i>Hydrochoerus hydrochaeris</i> | 2   | -9090.523   | 369.643    | 626.026 | 0.0078 | -8964.939   | 804  | 2500 | 0.322 | -8629.358   | 9    | 2500 | 0.004 |
| <i>Hystrix indica</i>            | 2   | -8524.286   | 312.148    | 479.766 | 0.0046 | -8176.926   | 297  | 2500 | 0.119 | -8144.001   | 30   | 2500 | 0.012 |
| <i>Kogia breviceps</i>           | 9   | -22502.096  | 11523.824  | 30.036  | 0.0010 | -17847.999  | 0    | 2500 | 0.000 | -18113.233  | 0    | 2500 | 0.000 |
| <i>Kogia sima</i>                | 4   | -10383.681  | 5104.455   | 33.751  | 0.0009 | -8155.970   | 0    | 2500 | 0.000 | -8315.915   | 0    | 2500 | 0.000 |
| <i>Lemur catta</i>               | 6   | -12202.717  | 1814.494   | 37.826  | 0.0012 | -10508.726  | 0    | 2500 | 0.000 | -10834.810  | 0    | 2500 | 0.000 |
| <i>Leontopithecus rosalia</i>    | 2   | -1941.847   | 632.863    | 15.806  | 0.0005 | -1629.890   | 44   | 2500 | 0.018 | -1677.984   | 73   | 2500 | 0.029 |
| <i>Lontra cadensis</i>           | 5   | -3891.403   | 1308.044   | 14.340  | 0.0007 | -3191.615   | 1    | 2500 | 0.000 | -3281.776   | 2    | 2500 | 0.001 |
| <i>Loxodonta</i>                 | 2   | -4690.195   | 174.946    | 334.234 | 0.0078 | -4651.666   | 1076 | 2500 | 0.430 | -4510.816   | 141  | 2500 | 0.056 |
| <i>Lynx rufus</i>                | 38  | -73788.149  | 3361.037   | 26.424  | 0.0002 | -72261.448  | 161  | 2500 | 0.064 | -71608.052  | 30   | 2500 | 0.012 |
| <i>Macaca mulatta</i>            | 6   | -27266.714  | 1536.891   | 136.942 | 0.0030 | -26292.263  | 46   | 2500 | 0.018 | -25764.718  | 1    | 2500 | 0.000 |
| <i>Macropus rufus</i>            | 18  | -44425.290  | 23495.820  | 30.900  | 0.0014 | -36580.388  | 0    | 2500 | 0.000 | -37108.201  | 0    | 2500 | 0.000 |
| <i>Mandrillus sphinx</i>         | 2   | -8960.646   | 908.935    | 167.279 | 0.0036 | -8022.081   | 1    | 2500 | 0.000 | -8235.045   | 0    | 2500 | 0.000 |
| <i>Manis pentadactyla</i>        | 2   | -1499.856   | 158.729    | 20.754  | 0.0012 | -1366.897   | 255  | 2500 | 0.102 | -1407.886   | 398  | 2500 | 0.159 |
| <i>Megaptera novaeangliae</i>    | 3   | -12988.123  | 826.606    | 109.772 | 0.0006 | -11680.300  | 1    | 2500 | 0.000 | -11786.346  | 0    | 2500 | 0.000 |
| <i>Mesocricetus auratus</i>      | 3   | -9721.971   | 440.122    | 255.678 | 0.0078 | -9862.850   | 1755 | 2500 | 0.702 | -9299.076   | 38   | 2500 | 0.015 |
| <i>Microtus californicus</i>     | 2   | -8304.907   | 4344.717   | 65.071  | 0.0008 | -7256.472   | 1    | 2500 | 0.000 | -7406.702   | 2    | 2500 | 0.001 |
| <i>Mus musculus</i>              | 12  | -21348.951  | 1868.631   | 33.184  | 0.0015 | -18568.720  | 0    | 2500 | 0.000 | -19064.538  | 0    | 2500 | 0.000 |
| <i>Mustela putorius</i>          | 3   | -2305.226   | 932.830    | 12.807  | 0.0005 | -2101.303   | 245  | 2500 | 0.098 | -2145.038   | 384  | 2500 | 0.154 |
| <i>Myrmecophaga tridactyla</i>   | 35  | -46063.663  | 1427.022   | 24.799  | 0.0013 | -44693.456  | 65   | 2500 | 0.026 | -43498.056  | 0    | 2500 | 0.000 |
| <i>Ochotona curzoniae</i>        | 41  | -47902.498  | 21625.569  | 10.185  | 0.0004 | -37963.569  | 0    | 2500 | 0.000 | -38408.637  | 0    | 2500 | 0.000 |
| <i>Odocoileus virginianus</i>    | 8   | -51268.828  | 6402.659   | 123.062 | 0.0016 | -45418.157  | 0    | 2500 | 0.000 | -46673.114  | 0    | 2500 | 0.000 |
| <i>Onychomys leucogaster</i>     | 2   | -6544.965   | 2516.117   | 43.064  | 0.0002 | -5564.428   | 2    | 2500 | 0.001 | -5687.168   | 2    | 2500 | 0.001 |
| <i>Oryzteropus afer</i>          | 14  | -19383.275  | 692.025    | 32.067  | 0.0016 | -18278.148  | 9    | 2500 | 0.004 | -18185.818  | 1    | 2500 | 0.000 |
| <i>Oryzctolagus cuniculus</i>    | 15  | -50265.930  | 6043.039   | 60.823  | 0.0016 | -43916.843  | 0    | 2500 | 0.000 | -44905.968  | 0    | 2500 | 0.000 |
| <i>Oryzctolagus</i>              | 102 | -388563.150 | 160118.413 | 42.890  | 0.0017 | -327393.080 | 1134 | 1366 | 0.000 | -331568.703 | 1134 | 1366 | 0.000 |
| <i>Ovis aries</i>                | 29  | -100712.136 | 20650.777  | 77.129  | 0.0069 | -85877.956  | 0    | 2500 | 0.000 | -88031.916  | 0    | 2500 | 0.000 |

|                                  |    |             |          |         |        |             |        |        |       |             |        |        |       |
|----------------------------------|----|-------------|----------|---------|--------|-------------|--------|--------|-------|-------------|--------|--------|-------|
| <i>Pan_paniscus</i>              | 68 | -250555.182 | 3070.209 | 91.496  | 0.0018 | -284188.960 | 2500   | 2247   | 1.000 | -239464.854 | 253    | 2247   | 0.000 |
| <i>Panthera_leo</i>              | 2  | -964.468    | 338.328  | 6.383   | 0.0002 | -796.801    | 154    | 2500   | 0.062 | -815.183    | 181    | 2500   | 0.072 |
| <i>Panthera_tigris</i>           | 3  | -1133.080   | 510.554  | 4.367   | 0.0002 | -913.607    | 95     | 2500   | 0.038 | -936.051    | 107    | 2500   | 0.043 |
| <i>Perogthius_parvus</i>         | 6  | -23039.645  | 1790.619 | 68.013  | 0.0003 | -21231.155  | 1      | 2500   | 0.000 | -21800.778  | 8      | 2500   | 0.003 |
| <i>Ptilocolobus_badius</i>       | 2  | -9151.116   | 1332.551 | 162.169 | 0.0055 | -7880.202   | 0      | 2500   | 0.000 | -8176.083   | 0      | 2500   | 0.000 |
| <i>Pongo_pygmaeus</i>            | 3  | -8526.785   | 312.523  | 179.542 | 0.0026 | -8448.467   | 1011   | 2500   | 0.404 | -8186.818   | 72     | 2500   | 0.029 |
| <i>Porcupine</i>                 | 3  | -5609.011   | 1993.945 | 31.888  | 0.0009 | -4649.544   | 0      | 2500   | 0.000 | -4781.658   | 1      | 2500   | 0.000 |
| <i>Priodontes_maximus</i>        | 4  | -10026.444  | 3493.988 | 50.041  | 0.0030 | -8346.036   | 0      | 2500   | 0.000 | -8561.543   | 0      | 2500   | 0.000 |
| <i>Proteles_cristata</i>         | 2  | -1412.123   | 33.633   | 430.748 | 0.0235 | -1361.373   | 836    | 2500   | 0.334 | -1378.899   | 599    | 2500   | 0.240 |
| <i>Puma_concolor</i>             | 24 | -56550.423  | 2185.276 | 36.439  | 0.0004 | -55842.824  | 472    | 2500   | 0.189 | -55279.860  | 112    | 2500   | 0.045 |
| <i>Rangifer_tarandus</i>         | 8  | -39075.736  | 1934.191 | 122.614 | 0.0024 | -35545.036  | 0      | 2500   | 0.000 | -36582.790  | 0      | 2500   | 0.000 |
| <i>Rattus_norvegicus</i>         | 5  | -11699.502  | 1814.285 | 47.847  | 0.0018 | -10042.661  | 0      | 2500   | 0.000 | -10358.025  | 0      | 2500   | 0.000 |
| <i>Rhinolophus_ferrumequinum</i> | 18 | -12007.052  | 364.878  | 17.078  | 0.0019 | -12198.221  | 1779   | 2500   | 0.712 | -11519.872  | 130    | 2500   | 0.052 |
| <i>Saguinus_oedipus</i>          | 2  | -1689.476   | 681.275  | 12.307  | 0.0004 | -1431.968   | 69     | 2500   | 0.028 | -1466.688   | 106    | 2500   | 0.042 |
| <i>Simia_paniscus</i>            | 4  | -3635.100   | 1891.971 | 14.850  | 0.0012 | -3041.215   | 5      | 2500   | 0.002 | -3108.911   | 8      | 2500   | 0.003 |
| <i>Suricata_suricatta</i>        | 2  | -1648.185   | 421.826  | 14.604  | 0.0005 | -1403.780   | 63     | 2500   | 0.025 | -1451.232   | 121    | 2500   | 0.048 |
| <i>Sus_scrofa</i>                | 2  | -2315.313   | 674.726  | 23.785  | 0.0011 | -1966.831   | 13     | 2500   | 0.005 | -2032.701   | 58     | 2500   | 0.023 |
| <i>Tamandua_tetradactyla</i>     | 2  | -2653.332   | 251.273  | 41.782  | 0.0017 | -2391.139   | 50     | 2500   | 0.020 | -2455.483   | 113    | 2500   | 0.045 |
| <i>Tamias_minimus</i>            | 6  | -16198.539  | 4867.053 | 38.970  | 0.0006 | -14177.680  | 0      | 2500   | 0.000 | -14484.705  | 0      | 2500   | 0.000 |
| <i>Tapirus_indicus</i>           | 3  | -15167.719  | 963.757  | 174.678 | 0.0023 | -14021.730  | 0      | 2500   | 0.000 | -14218.225  | 0      | 2500   | 0.000 |
| <i>Taxidea_taxus</i>             | 2  | -1255.619   | 60.433   | 16.997  | 0.0001 | -1255.295   | 1249   | 2500   | 0.500 | -1244.928   | 1130   | 2500   | 0.452 |
| <i>Tolypeutes_matacus</i>        | 3  | -4734.529   | 207.973  | 80.098  | 0.0032 | -4523.036   | 355    | 2500   | 0.142 | -4495.840   | 113    | 2500   | 0.045 |
| <i>Tupaia_belangeri</i>          | 4  | -2104.535   | 998.445  | 6.955   | 0.0004 | -1789.475   | 52     | 2500   | 0.021 | -1829.311   | 107    | 2500   | 0.043 |
| <i>Tursiops_truncatus</i>        | 41 | -10876.961  | 5702.035 | 3.154   | 0.0011 | -9314.351   | 0      | 2500   | 0.000 | -9442.420   | 0      | 2500   | 0.000 |
| <i>Ursus_arctos</i>              | 2  | -1139.913   | 469.829  | 7.726   | 0.0002 | -919.668    | 67     | 2500   | 0.027 | -942.806    | 85     | 2500   | 0.034 |
| <i>Varecia_rubra</i>             | 3  | -4081.501   | 1494.750 | 21.945  | 0.0007 | -3385.497   | 0      | 2500   | 0.000 | -3463.964   | 5      | 2500   | 0.002 |
| <i>Vespertilio_sinensis</i>      | 17 | -12352.185  | 411.895  | 19.302  | 0.0023 | -12605.251  | 1900   | 2500   | 0.760 | -11777.572  | 81     | 2500   | 0.032 |
| <i>Vulpes_lagopus</i>            | 5  | -7207.401   | 1092.861 | 26.199  | 0.0008 | -6133.731   | 0      | 2500   | 0.000 | -6326.786   | 1      | 2500   | 0.000 |
| <i>Zaedyus_pichiy</i>            | 2  | -2650.833   | 295.983  | 50.619  | 0.0028 | -2385.633   | 53     | 2500   | 0.021 | -2476.917   | 164    | 2500   | 0.066 |
| <i>Zalophus_californianus</i>    | 13 | -11509.865  | 6034.048 | 12.655  | 0.0005 | -9535.517   | 0      | 2500   | 0.000 | -9688.166   | 0      | 2500   | 0.000 |
| Passing rate (%)                 |    |             |          |         |        |             |        |        | 30.4  |             |        |        | 15.7  |
| #Passing rate (%) (P-value=0.05) |    |             |          |         |        |             |        |        | 45.3  |             |        |        | 37.6  |
| <b>Mean</b>                      |    | -20036.273  | 2502.204 | 85.378  | 0.003  | -19988.854  | 582.6  | 2494.9 | 0.231 | -18593.889  | 295.29 | 2494.9 | 0.116 |
| <b>Std. Err.</b>                 |    | 2730.537    | 620.126  | 23.841  | 0.001  | 2744.906    | 53.288 | 4.237  | 0.021 | 2525.490    | 33.012 | 4.237  | 0.013 |

\* $N=2500$  is the number of Gibb samples selected from 25000 simulated communities (*i.e.*, every tenth iteration of the last 25,000 Gibbs samples), it is chosen to compute the pseudo  $p$ -value (as explained below) for conducting the neutrality test.  $L_0$  is the *actual log-likelihood*.  $\theta$  is the median of biodiversity parameters computed from 25,000 times of simulations.  $M$ -value is the average medians of the migration rates of local communities in each meta-community, also computed from 25,000 times of simulations.  $L_M$  is the median of the log-likelihoods of the simulated neutral meta-community samples; and  $N_M$  is the number of simulated neutral meta-community samples with their likelihoods not exceeding the actual likelihood satisfying (*i.e.*,  $L \leq L_0$  where  $L$  and  $L_0$  are the simulated and actual likelihood respectively),  $P_M = N_M / N$  is the pseudo  $p$ -value for testing the neutrality at meta-community level; traditionally, if  $P_M > 0.05$ , the meta-community is considered indistinguishable from pattern predicted by the MSN model.  $L_L$  is the median of the log-likelihoods of the simulated local community samples, and  $N_L$  is the number of simulated local community samples with their likelihoods not exceeding the  $L_0$ , (*i.e.*,  $L \leq L_0$  where  $L$  and  $L_0$  are the simulated and actual likelihood respectively),  $P_L = N_L / N$ , is the pseudo  $p$ -value for testing the neutrality at the local community level; if  $P_L > 0.05$ , the local community satisfies the neutral model. See Harris *et al.* (2017) for more detailed explanations of these fitting parameters. Also see legends for Table 2 for additional information on P-value.

\*\*Due to a typo error in Harris *et al.* (2017), the  $P_M$ -values exhibited here are adjusted as  $(P_M = 1 - P_{MS})$ , where  $P_{MS}$  is output from their computational program. Similarly, the  $P_L$ -values are adjusted as  $(P_L = 1 - P_{LS})$ , where  $P_{LS}$  is output from their computational program. See <https://arxiv.org/abs/1410.4038> for the latest update of Harris *et al.* (2017).
