# Supplementary material for: Cross-Scale Analyses of Animal and Human Gut Microbiome Assemblies from Metacommunity to Global Landscape
Source: PubMed Central journal article supplement (PMC8407200; doi:10.1128/msystems.00633-21), 2021-07-06
Supplement: msystems.00633-21-st003.pdf [file msystems.00633-21-st003.pdf]

**Table S3.** Fitting the MSN (multisite neutral) model with the AGP (American gut microbiome project) datasets: 100 AGP samples were taken randomly from 1474 individuals, treated as a metacommunity and fitted to a MSN model. The process was repeated 100 times, and a total of 100 MSN models were obtained\*.

| Sampling No. | $L_o$       | $\theta$ | $M$ -value | Metacommunity |       |      |       | Local community |       |      |       |
|--------------|-------------|----------|------------|---------------|-------|------|-------|-----------------|-------|------|-------|
|              |             |          |            | $L_M$         | $N_M$ | $N$  | $p_M$ | $L_L$           | $N_L$ | $N$  | $p_L$ |
| 1            | -297675.578 | 1193.879 | 173.600    | -401021.282   | 2455  | 2455 | 1.000 | -332224.745     | 2455  | 2455 | 1.000 |
| 2            | -280393.038 | 1264.983 | 161.680    | -380849.138   | 2455  | 2455 | 1.000 | -311470.870     | 2455  | 2455 | 1.000 |
| 3            | -297718.656 | 1299.127 | 172.929    | -409927.176   | 2455  | 2455 | 1.000 | -332169.957     | 2455  | 2455 | 1.000 |
| 4            | -294802.917 | 1307.393 | 159.079    | -390489.937   | 2455  | 2455 | 1.000 | -328947.947     | 2455  | 2455 | 1.000 |
| 5            | -276875.559 | 1200.573 | 156.067    | -372925.587   | 2455  | 2455 | 1.000 | -309010.209     | 2455  | 2455 | 1.000 |
| 6            | -285529.358 | 1303.809 | 148.414    | -376070.921   | 2455  | 2455 | 1.000 | -319938.882     | 2455  | 2455 | 1.000 |
| 7            | -289176.509 | 1254.823 | 163.108    | -385054.097   | 2410  | 2410 | 1.000 | -322215.536     | 2410  | 2410 | 1.000 |
| 8            | -292446.338 | 1267.778 | 161.384    | -390760.364   | 2455  | 2455 | 1.000 | -325819.175     | 2455  | 2455 | 1.000 |
| 9            | -280587.633 | 1323.567 | 152.546    | -374160.262   | 2455  | 2455 | 1.000 | -312323.506     | 2455  | 2455 | 1.000 |
| 10           | -286561.372 | 1280.695 | 153.065    | -380899.039   | 2455  | 2455 | 1.000 | -320782.498     | 2455  | 2455 | 1.000 |
| 11           | -287594.622 | 1352.370 | 153.493    | -384628.740   | 2455  | 2455 | 1.000 | -321649.286     | 2455  | 2455 | 1.000 |
| 12           | -283039.168 | 1265.290 | 158.112    | -382810.027   | 2455  | 2455 | 1.000 | -316299.819     | 2455  | 2455 | 1.000 |
| 13           | -286032.466 | 1263.136 | 158.678    | -383047.811   | 2410  | 2410 | 1.000 | -319033.263     | 2410  | 2410 | 1.000 |
| 14           | -295988.615 | 1254.401 | 168.721    | -396526.148   | 2500  | 2500 | 1.000 | -329756.954     | 2500  | 2500 | 1.000 |
| 15           | -289822.475 | 1333.524 | 151.427    | -387091.408   | 2500  | 2500 | 1.000 | -324792.351     | 2500  | 2500 | 1.000 |
| 16           | -297181.501 | 1328.328 | 160.503    | -393447.260   | 2500  | 2500 | 1.000 | -331826.539     | 2500  | 2500 | 1.000 |
| 17           | -303042.883 | 1332.587 | 173.301    | -407855.173   | 2500  | 2500 | 1.000 | -337089.777     | 2500  | 2500 | 1.000 |
| 18           | -295116.290 | 1265.274 | 171.020    | -401778.020   | 2500  | 2500 | 1.000 | -329143.011     | 2500  | 2500 | 1.000 |
| 19           | -286841.894 | 1243.043 | 158.466    | -384394.591   | 2500  | 2500 | 1.000 | -319836.968     | 2500  | 2500 | 1.000 |
| 20           | -289816.088 | 1290.038 | 163.438    | -390787.087   | 2500  | 2500 | 1.000 | -323024.999     | 2500  | 2500 | 1.000 |
| 21           | -303445.384 | 1290.381 | 170.548    | -406930.342   | 2500  | 2500 | 1.000 | -338511.013     | 2500  | 2500 | 1.000 |
| 22           | -285369.649 | 1271.439 | 164.299    | -387108.446   | 2454  | 2454 | 1.000 | -317938.121     | 2454  | 2454 | 1.000 |
| 23           | -286799.664 | 1303.935 | 158.349    | -384503.352   | 2500  | 2500 | 1.000 | -319748.100     | 2500  | 2500 | 1.000 |
| 24           | -294160.218 | 1269.464 | 166.818    | -396059.215   | 2500  | 2500 | 1.000 | -328205.583     | 2500  | 2500 | 1.000 |
| 25           | -278943.668 | 1278.627 | 145.355    | -366994.506   | 2500  | 2500 | 1.000 | -311621.159     | 2500  | 2500 | 1.000 |
| 26           | -286163.013 | 1233.798 | 162.342    | -383499.720   | 2500  | 2500 | 1.000 | -318485.139     | 2500  | 2500 | 1.000 |
| 27           | -297820.925 | 1231.660 | 173.250    | -399074.917   | 2500  | 2500 | 1.000 | -330962.995     | 2500  | 2500 | 1.000 |
| 28           | -285910.354 | 1255.399 | 163.471    | -385700.346   | 2500  | 2500 | 1.000 | -318016.432     | 2500  | 2500 | 1.000 |
| 29           | -287421.239 | 1215.652 | 163.605    | -385826.296   | 2500  | 2500 | 1.000 | -320515.453     | 2500  | 2500 | 1.000 |
| 30           | -276529.233 | 1278.192 | 150.061    | -369911.533   | 2500  | 2500 | 1.000 | -308638.596     | 2500  | 2500 | 1.000 |
| 31           | -294825.658 | 1267.187 | 170.341    | -395798.869   | 2500  | 2500 | 1.000 | -327327.967     | 2500  | 2500 | 1.000 |
| 32           | -282292.137 | 1223.517 | 162.700    | -378249.948   | 2500  | 2500 | 1.000 | -313914.723     | 2500  | 2500 | 1.000 |
| 33           | -288177.798 | 1227.769 | 162.710    | -387109.629   | 2409  | 2409 | 1.000 | -320785.916     | 2409  | 2409 | 1.000 |
| 34           | -305374.578 | 1331.330 | 168.461    | -410828.349   | 2500  | 2500 | 1.000 | -341555.403     | 2500  | 2500 | 1.000 |
| 35           | -284550.258 | 1273.106 | 155.212    | -382643.750   | 2500  | 2500 | 1.000 | -317632.060     | 2500  | 2500 | 1.000 |
| 36           | -288158.521 | 1253.306 | 161.057    | -388715.175   | 2500  | 2500 | 1.000 | -321560.929     | 2500  | 2500 | 1.000 |
| 37           | -290152.950 | 1214.914 | 160.368    | -385498.004   | 2500  | 2500 | 1.000 | -324137.339     | 2500  | 2500 | 1.000 |
| 38           | -277447.932 | 1254.415 | 151.915    | -373194.359   | 2500  | 2500 | 1.000 | -309814.598     | 2500  | 2500 | 1.000 |
| 39           | -278824.570 | 1197.952 | 160.146    | -376340.487   | 2500  | 2500 | 1.000 | -309677.603     | 2500  | 2500 | 1.000 |
| 40           | -287392.180 | 1204.540 | 173.685    | -393264.945   | 2500  | 2500 | 1.000 | -319284.784     | 2500  | 2500 | 1.000 |
| 41           | -308296.837 | 1287.560 | 173.120    | -409681.716   | 2500  | 2500 | 1.000 | -342585.654     | 2500  | 2500 | 1.000 |

|    |             |          |         |             |      |      |       |             |      |      |       |
|----|-------------|----------|---------|-------------|------|------|-------|-------------|------|------|-------|
| 42 | -285211.843 | 1230.611 | 167.344 | -389141.381 | 2500 | 2500 | 1.000 | -317347.610 | 2500 | 2500 | 1.000 |
| 43 | -280187.921 | 1278.284 | 146.289 | -371925.691 | 2500 | 2500 | 1.000 | -313317.099 | 2500 | 2500 | 1.000 |
| 44 | -280765.746 | 1240.584 | 163.796 | -384574.182 | 2410 | 2410 | 1.000 | -312746.174 | 2410 | 2410 | 1.000 |
| 45 | -296499.719 | 1333.757 | 156.550 | -391291.129 | 2500 | 2500 | 1.000 | -331580.470 | 2500 | 2500 | 1.000 |
| 46 | -281772.047 | 1257.628 | 164.701 | -381729.072 | 2409 | 2410 | 1.000 | -313479.940 | 2410 | 2410 | 1.000 |
| 47 | -272613.171 | 1326.904 | 142.536 | -359858.717 | 2455 | 2455 | 1.000 | -304191.057 | 2455 | 2455 | 1.000 |
| 48 | -290950.488 | 1308.597 | 161.264 | -388455.230 | 2455 | 2455 | 1.000 | -323929.473 | 2455 | 2455 | 1.000 |
| 49 | -288802.079 | 1274.174 | 164.702 | -386323.510 | 2454 | 2455 | 1.000 | -321542.354 | 2455 | 2455 | 1.000 |
| 50 | -282090.477 | 1243.296 | 165.594 | -385384.030 | 2409 | 2410 | 1.000 | -313512.691 | 2410 | 2410 | 1.000 |
| 51 | -287960.847 | 1281.293 | 168.231 | -393035.229 | 2500 | 2500 | 1.000 | -320043.242 | 2500 | 2500 | 1.000 |
| 52 | -284632.832 | 1217.642 | 169.288 | -391249.479 | 2500 | 2500 | 1.000 | -317154.438 | 2500 | 2500 | 1.000 |
| 53 | -275826.877 | 1299.467 | 151.970 | -373890.749 | 2500 | 2500 | 1.000 | -308114.731 | 2500 | 2500 | 1.000 |
| 54 | -279761.489 | 1211.107 | 161.940 | -378297.819 | 2500 | 2500 | 1.000 | -311171.963 | 2500 | 2500 | 1.000 |
| 55 | -282258.809 | 1199.387 | 163.631 | -380315.612 | 2500 | 2500 | 1.000 | -314838.498 | 2500 | 2500 | 1.000 |
| 56 | -297213.611 | 1263.001 | 169.659 | -400689.343 | 2500 | 2500 | 1.000 | -331496.445 | 2500 | 2500 | 1.000 |
| 57 | -294138.530 | 1311.002 | 166.359 | -396594.237 | 2500 | 2500 | 1.000 | -327388.319 | 2500 | 2500 | 1.000 |
| 58 | -292420.832 | 1264.236 | 160.996 | -388388.178 | 2500 | 2500 | 1.000 | -326008.697 | 2500 | 2500 | 1.000 |
| 59 | -285423.232 | 1213.952 | 168.546 | -388506.112 | 2500 | 2500 | 1.000 | -318644.420 | 2500 | 2500 | 1.000 |
| 60 | -294687.159 | 1237.971 | 172.177 | -398696.484 | 2500 | 2500 | 1.000 | -327692.043 | 2500 | 2500 | 1.000 |
| 61 | -291622.285 | 1222.444 | 167.948 | -387537.371 | 2500 | 2500 | 1.000 | -324504.573 | 2500 | 2500 | 1.000 |
| 62 | -292251.760 | 1296.217 | 162.968 | -392206.567 | 2500 | 2500 | 1.000 | -325016.861 | 2500 | 2500 | 1.000 |
| 63 | -299525.746 | 1294.723 | 165.558 | -403117.305 | 2500 | 2500 | 1.000 | -334744.278 | 2500 | 2500 | 1.000 |
| 64 | -288481.465 | 1295.392 | 163.260 | -392266.672 | 2500 | 2500 | 1.000 | -321829.144 | 2500 | 2500 | 1.000 |
| 65 | -290341.353 | 1277.697 | 163.873 | -387167.580 | 2500 | 2500 | 1.000 | -322548.426 | 2500 | 2500 | 1.000 |
| 66 | -293601.287 | 1296.168 | 164.533 | -392822.649 | 2500 | 2500 | 1.000 | -326333.551 | 2500 | 2500 | 1.000 |
| 67 | -278498.347 | 1297.447 | 148.650 | -374537.192 | 2500 | 2500 | 1.000 | -311579.213 | 2500 | 2500 | 1.000 |
| 68 | -284887.194 | 1338.891 | 158.828 | -386201.243 | 2500 | 2500 | 1.000 | -317645.550 | 2500 | 2500 | 1.000 |
| 69 | -275977.289 | 1250.438 | 153.573 | -370664.681 | 2500 | 2500 | 1.000 | -308077.051 | 2500 | 2500 | 1.000 |
| 70 | -288637.574 | 1258.818 | 166.238 | -389649.533 | 2500 | 2500 | 1.000 | -320410.322 | 2500 | 2500 | 1.000 |
| 71 | -291598.083 | 1202.297 | 170.813 | -392895.406 | 2500 | 2500 | 1.000 | -324762.726 | 2500 | 2500 | 1.000 |
| 72 | -277122.443 | 1234.575 | 149.165 | -367172.877 | 2500 | 2500 | 1.000 | -309880.533 | 2500 | 2500 | 1.000 |
| 73 | -296780.238 | 1251.159 | 172.000 | -403170.295 | 2500 | 2500 | 1.000 | -330809.601 | 2500 | 2500 | 1.000 |
| 74 | -291973.682 | 1231.311 | 162.885 | -383785.457 | 2500 | 2500 | 1.000 | -324330.244 | 2500 | 2500 | 1.000 |
| 75 | -277634.495 | 1202.702 | 161.615 | -376714.358 | 2500 | 2500 | 1.000 | -308761.984 | 2500 | 2500 | 1.000 |
| 76 | -302698.048 | 1289.889 | 173.219 | -404665.474 | 2500 | 2500 | 1.000 | -336083.201 | 2500 | 2500 | 1.000 |
| 77 | -296785.838 | 1266.112 | 168.856 | -399337.201 | 2500 | 2500 | 1.000 | -330887.643 | 2500 | 2500 | 1.000 |
| 78 | -293310.202 | 1215.169 | 175.238 | -402838.450 | 2500 | 2500 | 1.000 | -326915.946 | 2500 | 2500 | 1.000 |
| 79 | -283190.001 | 1293.461 | 158.036 | -382055.765 | 2500 | 2500 | 1.000 | -315471.825 | 2500 | 2500 | 1.000 |
| 80 | -301484.607 | 1292.205 | 168.916 | -398678.088 | 2500 | 2500 | 1.000 | -335204.359 | 2500 | 2500 | 1.000 |
| 81 | -288361.147 | 1300.492 | 160.756 | -392456.675 | 2500 | 2500 | 1.000 | -322651.481 | 2500 | 2500 | 1.000 |
| 82 | -279612.325 | 1221.674 | 160.881 | -381530.735 | 2500 | 2500 | 1.000 | -311316.457 | 2500 | 2500 | 1.000 |
| 83 | -278693.047 | 1233.513 | 152.123 | -369092.561 | 2500 | 2500 | 1.000 | -310946.225 | 2500 | 2500 | 1.000 |
| 84 | -283173.936 | 1241.112 | 161.832 | -378001.301 | 2500 | 2500 | 1.000 | -314809.540 | 2500 | 2500 | 1.000 |
| 85 | -293472.173 | 1280.999 | 161.752 | -390546.927 | 2500 | 2500 | 1.000 | -327072.426 | 2500 | 2500 | 1.000 |
| 86 | -297047.712 | 1229.873 | 177.562 | -404401.250 | 2500 | 2500 | 1.000 | -330931.670 | 2500 | 2500 | 1.000 |
| 87 | -305495.119 | 1297.804 | 166.410 | -400931.067 | 2500 | 2500 | 1.000 | -339975.666 | 2500 | 2500 | 1.000 |
| 88 | -288408.672 | 1260.985 | 160.302 | -393073.746 | 2500 | 2500 | 1.000 | -322242.569 | 2500 | 2500 | 1.000 |

|                         |             |          |         |             |        |        |       |             |         |        |       |
|-------------------------|-------------|----------|---------|-------------|--------|--------|-------|-------------|---------|--------|-------|
| 89                      | -299551.675 | 1226.320 | 171.061 | -397411.932 | 2500   | 2500   | 1.000 | -333109.499 | 2500    | 2500   | 1.000 |
| 90                      | -276654.351 | 1221.530 | 159.296 | -378771.814 | 2500   | 2500   | 1.000 | -308394.172 | 2500    | 2500   | 1.000 |
| 91                      | -280092.615 | 1231.796 | 154.198 | -368852.686 | 2500   | 2500   | 1.000 | -311377.473 | 2500    | 2500   | 1.000 |
| 92                      | -282613.828 | 1227.611 | 156.131 | -374706.520 | 2500   | 2500   | 1.000 | -315161.003 | 2500    | 2500   | 1.000 |
| 93                      | -286588.456 | 1274.796 | 157.039 | -382219.887 | 2500   | 2500   | 1.000 | -319266.528 | 2500    | 2500   | 1.000 |
| 94                      | -285298.655 | 1243.093 | 164.037 | -385325.510 | 2500   | 2500   | 1.000 | -317893.582 | 2500    | 2500   | 1.000 |
| 95                      | -283913.017 | 1263.060 | 157.984 | -381829.105 | 2500   | 2500   | 1.000 | -316469.268 | 2500    | 2500   | 1.000 |
| 96                      | -292796.673 | 1227.956 | 178.098 | -405178.469 | 2500   | 2500   | 1.000 | -324901.435 | 2500    | 2500   | 1.000 |
| 97                      | -283917.749 | 1245.996 | 155.788 | -377458.540 | 2500   | 2500   | 1.000 | -317032.862 | 2500    | 2500   | 1.000 |
| 98                      | -288280.579 | 1304.979 | 164.518 | -396353.276 | 2500   | 2500   | 1.000 | -322131.318 | 2500    | 2500   | 1.000 |
| 99                      | -285427.689 | 1322.123 | 155.699 | -379409.429 | 2500   | 2500   | 1.000 | -318230.043 | 2500    | 2500   | 1.000 |
| 100                     | -292821.000 | 1314.738 | 168.405 | -400114.952 | 2500   | 2500   | 1.000 | -325888.978 | 2500    | 2500   | 1.000 |
| <b>Mean</b>             | -288461.398 | 1264.592 | 162.425 | -387749.547 | 2487.8 | 2487.8 |       | -321480.747 | 2487.83 | 2487.8 |       |
| <b>Std. Err.</b>        | 769.882     | 3.829    | 0.747   | 1089.447    | 2.559  | 2.551  |       | 849.150     | 2.551   | 2.551  |       |
| <b>Passing Rate (%)</b> |             |          |         |             |        |        | 100%  |             |         |        | 100%  |

\* The column legends are the same as Table S2.
