# Supplementary material for: Cross-Scale Analyses of Animal and Human Gut Microbiome Assemblies from Metacommunity to Global Landscape
Source: PubMed Central journal article supplement (PMC8407200; doi:10.1128/msystems.00633-21), 2021-07-06
Supplement: msystems.00633-21-st004.pdf [file msystems.00633-21-st004.pdf]

**Table S4.** Fitting the MSN (multisite neutral) model with the CGP (Chinese gut microbiome project) datasets: 100 CGP samples were taken randomly from 314 individuals, treated as a metacommunity and fitted to a MSN model. The process was repeated 100 times, and a total of 100 MSN models were obtained\*.

| Sampling No. | $L_O$       | $\theta$ | $M$ -value | Metacommunity |       |      |       | Local community |       |      |       |
|--------------|-------------|----------|------------|---------------|-------|------|-------|-----------------|-------|------|-------|
|              |             |          |            | $L_M$         | $N_M$ | $N$  | $p_M$ | $L_L$           | $N_L$ | $N$  | $p_L$ |
| 1            | -165096.086 | 283.565  | 227.354    | -230787.596   | 2500  | 2500 | 1.000 | -176658.714     | 2500  | 2500 | 1.000 |
| 2            | -164243.387 | 289.871  | 210.167    | -230207.464   | 2500  | 2500 | 1.000 | -176082.952     | 2500  | 2500 | 1.000 |
| 3            | -170016.870 | 293.661  | 233.308    | -242958.089   | 2500  | 2500 | 1.000 | -181825.232     | 2500  | 2500 | 1.000 |
| 4            | -163260.368 | 285.908  | 219.858    | -231425.530   | 2500  | 2500 | 1.000 | -174769.155     | 2500  | 2500 | 1.000 |
| 5            | -169157.406 | 299.394  | 225.332    | -240236.643   | 2500  | 2500 | 1.000 | -181054.293     | 2500  | 2500 | 1.000 |
| 6            | -166945.197 | 286.735  | 212.204    | -231396.059   | 2500  | 2500 | 1.000 | -179168.696     | 2500  | 2500 | 1.000 |
| 7            | -167356.642 | 297.056  | 224.599    | -239600.097   | 2500  | 2500 | 1.000 | -179359.172     | 2500  | 2500 | 1.000 |
| 8            | -161407.443 | 281.434  | 210.058    | -226162.124   | 2500  | 2500 | 1.000 | -172865.701     | 2500  | 2500 | 1.000 |
| 9            | -164860.318 | 287.580  | 224.655    | -231819.272   | 2500  | 2500 | 1.000 | -176224.747     | 2500  | 2500 | 1.000 |
| 10           | -171281.977 | 297.676  | 231.789    | -242171.125   | 2500  | 2500 | 1.000 | -183675.271     | 2500  | 2500 | 1.000 |
| 11           | -173995.182 | 306.342  | 250.628    | -250499.747   | 2500  | 2500 | 1.000 | -186116.612     | 2500  | 2500 | 1.000 |
| 12           | -163115.762 | 280.678  | 207.580    | -227928.599   | 2500  | 2500 | 1.000 | -174898.786     | 2500  | 2500 | 1.000 |
| 13           | -163947.130 | 285.745  | 214.172    | -230497.860   | 2500  | 2500 | 1.000 | -175513.621     | 2500  | 2500 | 1.000 |
| 14           | -165443.562 | 281.142  | 220.054    | -230971.428   | 2500  | 2500 | 1.000 | -177218.706     | 2500  | 2500 | 1.000 |
| 15           | -163585.123 | 284.121  | 210.601    | -230870.822   | 2500  | 2500 | 1.000 | -175317.171     | 2500  | 2500 | 1.000 |
| 16           | -168610.504 | 284.350  | 245.883    | -238046.679   | 2500  | 2500 | 1.000 | -180199.430     | 2500  | 2500 | 1.000 |
| 17           | -165741.290 | 284.433  | 227.452    | -236502.856   | 2500  | 2500 | 1.000 | -177529.648     | 2500  | 2500 | 1.000 |
| 18           | -166181.947 | 282.697  | 227.707    | -234855.476   | 2500  | 2500 | 1.000 | -177946.064     | 2500  | 2500 | 1.000 |
| 19           | -169887.577 | 298.416  | 253.900    | -245271.087   | 2500  | 2500 | 1.000 | -181297.069     | 2500  | 2500 | 1.000 |
| 20           | -163705.277 | 297.386  | 200.875    | -231958.489   | 2500  | 2500 | 1.000 | -176000.035     | 2500  | 2500 | 1.000 |
| 21           | -165236.174 | 297.385  | 224.411    | -235693.792   | 2500  | 2500 | 1.000 | -176777.763     | 2500  | 2500 | 1.000 |
| 22           | -164624.039 | 290.218  | 199.296    | -229534.014   | 2500  | 2500 | 1.000 | -176878.428     | 2500  | 2500 | 1.000 |
| 23           | -167028.721 | 292.340  | 215.597    | -235470.580   | 2500  | 2500 | 1.000 | -179022.761     | 2500  | 2500 | 1.000 |
| 24           | -163127.165 | 287.320  | 199.916    | -231843.294   | 2500  | 2500 | 1.000 | -175336.275     | 2500  | 2500 | 1.000 |
| 25           | -163810.678 | 287.056  | 228.119    | -232130.077   | 2500  | 2500 | 1.000 | -175374.528     | 2500  | 2500 | 1.000 |
| 26           | -171236.272 | 296.805  | 243.700    | -244063.589   | 2500  | 2500 | 1.000 | -183154.705     | 2500  | 2500 | 1.000 |
| 27           | -171030.407 | 295.476  | 236.958    | -242682.401   | 2500  | 2500 | 1.000 | -183566.816     | 2500  | 2500 | 1.000 |
| 28           | -168604.176 | 298.614  | 216.973    | -238915.397   | 2500  | 2500 | 1.000 | -180879.082     | 2500  | 2500 | 1.000 |
| 29           | -167602.806 | 299.329  | 229.290    | -239286.370   | 2500  | 2500 | 1.000 | -179468.168     | 2500  | 2500 | 1.000 |
| 30           | -167829.613 | 289.143  | 225.207    | -237217.817   | 2500  | 2500 | 1.000 | -180261.809     | 2500  | 2500 | 1.000 |
| 31           | -166998.570 | 286.069  | 232.225    | -237903.031   | 2500  | 2500 | 1.000 | -178780.287     | 2500  | 2500 | 1.000 |
| 32           | -168174.729 | 291.946  | 227.602    | -237803.120   | 2500  | 2500 | 1.000 | -180327.285     | 2500  | 2500 | 1.000 |
| 33           | -163197.242 | 297.270  | 242.107    | -237490.402   | 2500  | 2500 | 1.000 | -174514.918     | 2500  | 2500 | 1.000 |
| 34           | -160466.175 | 288.305  | 193.312    | -224865.945   | 2500  | 2500 | 1.000 | -172079.287     | 2500  | 2500 | 1.000 |
| 35           | -164433.653 | 305.477  | 227.617    | -237240.540   | 2500  | 2500 | 1.000 | -175875.038     | 2500  | 2500 | 1.000 |
| 36           | -164636.492 | 289.716  | 211.942    | -232667.213   | 2500  | 2500 | 1.000 | -176751.834     | 2500  | 2500 | 1.000 |
| 37           | -165955.601 | 279.890  | 206.097    | -228902.686   | 2500  | 2500 | 1.000 | -178027.191     | 2500  | 2500 | 1.000 |
| 38           | -166410.080 | 302.739  | 230.585    | -239190.628   | 2500  | 2500 | 1.000 | -178306.202     | 2500  | 2500 | 1.000 |
| 39           | -167352.819 | 296.615  | 214.704    | -237629.462   | 2500  | 2500 | 1.000 | -179568.759     | 2500  | 2500 | 1.000 |
| 40           | -165625.752 | 290.246  | 204.196    | -231829.949   | 2500  | 2500 | 1.000 | -177803.649     | 2500  | 2500 | 1.000 |
| 41           | -163596.107 | 281.059  | 230.209    | -231184.501   | 2500  | 2500 | 1.000 | -174858.221     | 2500  | 2500 | 1.000 |

|    |             |         |         |             |      |      |       |             |      |      |       |
|----|-------------|---------|---------|-------------|------|------|-------|-------------|------|------|-------|
| 42 | -169959.949 | 287.263 | 251.406 | -240494.464 | 2500 | 2500 | 1.000 | -181739.815 | 2500 | 2500 | 1.000 |
| 43 | -167603.889 | 281.589 | 227.386 | -236148.392 | 2500 | 2500 | 1.000 | -179355.291 | 2500 | 2500 | 1.000 |
| 44 | -164478.988 | 284.127 | 218.423 | -232127.996 | 2500 | 2500 | 1.000 | -175852.119 | 2500 | 2500 | 1.000 |
| 45 | -165855.418 | 284.490 | 239.386 | -236169.941 | 2500 | 2500 | 1.000 | -177440.903 | 2500 | 2500 | 1.000 |
| 46 | -161419.233 | 290.512 | 214.945 | -227636.130 | 2500 | 2500 | 1.000 | -172602.914 | 2500 | 2500 | 1.000 |
| 47 | -166469.035 | 308.225 | 213.852 | -240131.106 | 2500 | 2500 | 1.000 | -178570.150 | 2500 | 2500 | 1.000 |
| 48 | -165097.352 | 288.857 | 215.489 | -231419.620 | 2500 | 2500 | 1.000 | -177049.785 | 2500 | 2500 | 1.000 |
| 49 | -165499.523 | 289.318 | 232.262 | -236296.610 | 2500 | 2500 | 1.000 | -177285.832 | 2500 | 2500 | 1.000 |
| 50 | -162456.834 | 297.450 | 191.954 | -229288.103 | 2500 | 2500 | 1.000 | -174889.621 | 2500 | 2500 | 1.000 |
| 51 | -163557.561 | 286.294 | 199.267 | -228228.201 | 2500 | 2500 | 1.000 | -175853.470 | 2500 | 2500 | 1.000 |
| 52 | -163634.987 | 274.645 | 212.146 | -226185.184 | 2500 | 2500 | 1.000 | -175433.038 | 2500 | 2500 | 1.000 |
| 53 | -166917.117 | 282.627 | 235.828 | -234790.034 | 2500 | 2500 | 1.000 | -178678.343 | 2500 | 2500 | 1.000 |
| 54 | -162550.681 | 288.643 | 210.627 | -231279.884 | 2500 | 2500 | 1.000 | -174405.890 | 2500 | 2500 | 1.000 |
| 55 | -167782.333 | 291.598 | 249.010 | -240071.455 | 2500 | 2500 | 1.000 | -179263.831 | 2500 | 2500 | 1.000 |
| 56 | -167159.557 | 286.006 | 239.676 | -236110.328 | 2500 | 2500 | 1.000 | -178182.256 | 2500 | 2500 | 1.000 |
| 57 | -165483.966 | 305.733 | 214.211 | -237373.463 | 2500 | 2500 | 1.000 | -177582.376 | 2500 | 2500 | 1.000 |
| 58 | -165449.500 | 289.718 | 219.224 | -232326.530 | 2500 | 2500 | 1.000 | -177185.537 | 2500 | 2500 | 1.000 |
| 59 | -166563.058 | 282.980 | 227.429 | -235921.623 | 2500 | 2500 | 1.000 | -178306.071 | 2500 | 2500 | 1.000 |
| 60 | -166417.471 | 293.646 | 223.967 | -236379.278 | 2500 | 2500 | 1.000 | -178664.547 | 2500 | 2500 | 1.000 |
| 61 | -168131.914 | 291.632 | 244.651 | -239378.067 | 2500 | 2500 | 1.000 | -179582.143 | 2500 | 2500 | 1.000 |
| 62 | -164423.435 | 269.002 | 230.777 | -227982.781 | 2500 | 2500 | 1.000 | -175965.564 | 2500 | 2500 | 1.000 |
| 63 | -167164.028 | 290.284 | 226.624 | -238403.830 | 2500 | 2500 | 1.000 | -179237.844 | 2500 | 2500 | 1.000 |
| 64 | -165236.018 | 294.731 | 220.523 | -235080.510 | 2500 | 2500 | 1.000 | -177175.641 | 2500 | 2500 | 1.000 |
| 65 | -169807.748 | 298.191 | 232.063 | -242174.463 | 2500 | 2500 | 1.000 | -182036.390 | 2500 | 2500 | 1.000 |
| 66 | -165075.913 | 296.181 | 235.391 | -234971.527 | 2500 | 2500 | 1.000 | -176706.381 | 2500 | 2500 | 1.000 |
| 67 | -166041.989 | 290.586 | 208.485 | -234827.616 | 2500 | 2500 | 1.000 | -178716.871 | 2500 | 2500 | 1.000 |
| 68 | -166092.561 | 286.091 | 230.577 | -232458.186 | 2500 | 2500 | 1.000 | -177461.200 | 2500 | 2500 | 1.000 |
| 69 | -169303.384 | 290.207 | 233.062 | -239972.342 | 2500 | 2500 | 1.000 | -181175.152 | 2500 | 2500 | 1.000 |
| 70 | -166163.280 | 296.012 | 216.618 | -235018.455 | 2500 | 2500 | 1.000 | -178203.677 | 2500 | 2500 | 1.000 |
| 71 | -169774.084 | 289.030 | 227.697 | -239074.261 | 2500 | 2500 | 1.000 | -181917.481 | 2500 | 2500 | 1.000 |
| 72 | -162729.530 | 284.732 | 211.988 | -228713.676 | 2500 | 2500 | 1.000 | -174238.262 | 2500 | 2500 | 1.000 |
| 73 | -161104.267 | 284.468 | 211.316 | -228766.288 | 2500 | 2500 | 1.000 | -172534.137 | 2500 | 2500 | 1.000 |
| 74 | -168714.422 | 289.321 | 230.144 | -238352.435 | 2500 | 2500 | 1.000 | -180724.848 | 2500 | 2500 | 1.000 |
| 75 | -165257.553 | 282.179 | 231.725 | -231905.448 | 2500 | 2500 | 1.000 | -176968.464 | 2500 | 2500 | 1.000 |
| 76 | -165085.245 | 293.100 | 217.528 | -237544.478 | 2500 | 2500 | 1.000 | -177258.758 | 2500 | 2500 | 1.000 |
| 77 | -168325.708 | 281.388 | 221.238 | -233385.390 | 2500 | 2500 | 1.000 | -180352.070 | 2500 | 2500 | 1.000 |
| 78 | -168963.707 | 295.385 | 242.716 | -243356.493 | 2500 | 2500 | 1.000 | -180761.873 | 2500 | 2500 | 1.000 |
| 79 | -167433.246 | 290.139 | 259.455 | -241514.413 | 2500 | 2500 | 1.000 | -178961.014 | 2500 | 2500 | 1.000 |
| 80 | -158809.981 | 293.066 | 188.639 | -222908.005 | 2500 | 2500 | 1.000 | -170929.689 | 2500 | 2500 | 1.000 |
| 81 | -171217.256 | 285.674 | 221.420 | -239548.876 | 2500 | 2500 | 1.000 | -183663.665 | 2500 | 2500 | 1.000 |
| 82 | -165825.633 | 296.596 | 217.763 | -236170.398 | 2500 | 2500 | 1.000 | -177571.215 | 2500 | 2500 | 1.000 |
| 83 | -166116.946 | 287.664 | 239.436 | -235918.031 | 2500 | 2500 | 1.000 | -177450.034 | 2500 | 2500 | 1.000 |
| 84 | -167813.530 | 293.446 | 229.420 | -240276.573 | 2500 | 2500 | 1.000 | -179856.645 | 2500 | 2500 | 1.000 |
| 85 | -159731.292 | 286.425 | 197.723 | -223595.497 | 2500 | 2500 | 1.000 | -171514.274 | 2500 | 2500 | 1.000 |
| 86 | -167801.173 | 281.971 | 228.775 | -232284.473 | 2500 | 2500 | 1.000 | -179700.192 | 2500 | 2500 | 1.000 |
| 87 | -163966.572 | 277.804 | 225.875 | -230836.785 | 2500 | 2500 | 1.000 | -175740.711 | 2500 | 2500 | 1.000 |
| 88 | -166543.555 | 297.603 | 217.762 | -236921.019 | 2500 | 2500 | 1.000 | -178634.026 | 2500 | 2500 | 1.000 |

|                         |             |         |         |             |       |       |       |             |       |       |       |
|-------------------------|-------------|---------|---------|-------------|-------|-------|-------|-------------|-------|-------|-------|
| 89                      | -166414.047 | 284.769 | 213.158 | -233954.561 | 2500  | 2500  | 1.000 | -178681.590 | 2500  | 2500  | 1.000 |
| 90                      | -165425.111 | 284.894 | 203.530 | -230304.257 | 2500  | 2500  | 1.000 | -177600.800 | 2500  | 2500  | 1.000 |
| 91                      | -167366.829 | 297.641 | 213.377 | -235737.681 | 2500  | 2500  | 1.000 | -179783.085 | 2500  | 2500  | 1.000 |
| 92                      | -165550.413 | 293.872 | 217.179 | -235627.536 | 2500  | 2500  | 1.000 | -177659.340 | 2500  | 2500  | 1.000 |
| 93                      | -167599.376 | 296.703 | 230.006 | -240266.814 | 2500  | 2500  | 1.000 | -179407.138 | 2500  | 2500  | 1.000 |
| 94                      | -165122.004 | 290.277 | 241.505 | -235041.645 | 2500  | 2500  | 1.000 | -176255.725 | 2500  | 2500  | 1.000 |
| 95                      | -164168.728 | 287.076 | 223.311 | -231880.164 | 2500  | 2500  | 1.000 | -175964.864 | 2500  | 2500  | 1.000 |
| 96                      | -160529.765 | 288.146 | 221.655 | -229648.208 | 2500  | 2500  | 1.000 | -171926.977 | 2500  | 2500  | 1.000 |
| 97                      | -163971.711 | 299.284 | 218.644 | -235230.773 | 2500  | 2500  | 1.000 | -175902.375 | 2500  | 2500  | 1.000 |
| 98                      | -163886.590 | 284.433 | 214.493 | -229793.110 | 2500  | 2500  | 1.000 | -175793.881 | 2500  | 2500  | 1.000 |
| 99                      | -167442.734 | 279.105 | 240.589 | -235373.192 | 2500  | 2500  | 1.000 | -178790.825 | 2500  | 2500  | 1.000 |
| 100                     | -167432.959 | 296.365 | 215.084 | -238367.876 | 2500  | 2500  | 1.000 | -179529.136 | 2500  | 2500  | 1.000 |
| <b>Mean</b>             | -165967.370 | 290.004 | 223.066 | -234886.563 | 2500  | 2500  |       | -177820.098 | 2500  | 2500  |       |
| <b>Std. Err.</b>        | 268.619     | 0.708   | 1.407   | 499.512     | 0.000 | 0.000 |       | 280.949     | 0.000 | 0.000 |       |
| <b>Passing Rate (%)</b> |             |         |         |             |       |       | 100%  |             |       |       | 100%  |

\* The column legends are the same as Table S2.
