# Supplementary material for: Cross-Scale Analyses of Animal and Human Gut Microbiome Assemblies from Metacommunity to Global Landscape
Source: PubMed Central journal article supplement (PMC8407200; doi:10.1128/msystems.00633-21), 2021-07-06
Supplement: msystems.00633-21-st005.pdf [file msystems.00633-21-st005.pdf]

**Table S5.** Fitting the MSN model at host-*class* level (microbiome landscape level): For each animal class, one AGM sample was randomly taken from each animal species within the same class, and all obtained samples were treated as a super-metacommunity to represent for the class, and were fitted to a MSN model for the class. A total of 10 MSN models for 10 super-metacommunities, corresponding to 10 animal classes, were fitted. To increase the robustness of the result, 100 times of repetitions of the process were performed by re-sampling samples from each animal species without replacement. Therefore, a total of 1000 (100x10) MSN models were built at the class level. For the classes of insects and mammals, occasionally, the samples with more than 30,000 reads were excluded due to the limitation of computational program used)\*.

| Sampling No. | $L_o$ | $\theta$  | $M$      | Metacommunity |           |     |       | Local community |           |     |       |       |
|--------------|-------|-----------|----------|---------------|-----------|-----|-------|-----------------|-----------|-----|-------|-------|
|              |       |           |          | $L_M$         | $N_M$     | $N$ | $P_M$ | $L_L$           | $N_L$     | $N$ | $P_L$ |       |
| Chromadorea  | 1     | -2050.506 | 926.918  | 6.804         | -1650.141 | 7   | 2500  | 0.003           | -1679.705 | 23  | 2500  | 0.009 |
|              | 2     | -2289.902 | 1022.118 | 7.198         | -1838.764 | 7   | 2500  | 0.003           | -1872.308 | 9   | 2500  | 0.004 |
|              | 3     | -2921.391 | 1110.427 | 11.938        | -2454.365 | 6   | 2500  | 0.002           | -2518.928 | 14  | 2500  | 0.006 |
|              | 4     | -1797.996 | 886.861  | 6.321         | -1505.408 | 46  | 2500  | 0.018           | -1534.333 | 77  | 2500  | 0.031 |
|              | 5     | -2662.252 | 1198.121 | 12.836        | -2223.062 | 9   | 2500  | 0.004           | -2283.487 | 17  | 2500  | 0.007 |
|              | 6     | -1475.366 | 626.424  | 4.662         | -1200.850 | 44  | 2500  | 0.018           | -1224.176 | 78  | 2500  | 0.031 |
|              | 7     | -1704.259 | 728.764  | 5.189         | -1393.897 | 35  | 2500  | 0.014           | -1421.205 | 54  | 2500  | 0.022 |
|              | 8     | -1836.134 | 756.223  | 5.691         | -1457.209 | 11  | 2500  | 0.004           | -1487.260 | 21  | 2500  | 0.008 |
|              | 9     | -1413.028 | 571.515  | 5.409         | -1117.808 | 16  | 2500  | 0.006           | -1142.510 | 29  | 2500  | 0.012 |
|              | 10    | -2942.728 | 1405.172 | 12.653        | -2474.824 | 6   | 2500  | 0.002           | -2538.188 | 23  | 2500  | 0.009 |
|              | 11    | -1895.069 | 922.894  | 6.459         | -1603.417 | 57  | 2500  | 0.023           | -1633.331 | 100 | 2500  | 0.040 |
|              | 12    | -2226.674 | 1084.402 | 9.430         | -1795.494 | 7   | 2500  | 0.003           | -1837.321 | 10  | 2500  | 0.004 |
|              | 13    | -1064.692 | 512.195  | 3.499         | -897.564  | 178 | 2500  | 0.071           | -915.102  | 209 | 2500  | 0.084 |
|              | 14    | -1734.286 | 857.020  | 7.298         | -1428.844 | 35  | 2500  | 0.014           | -1466.243 | 58  | 2500  | 0.023 |
|              | 15    | -1744.993 | 780.212  | 7.133         | -1418.077 | 14  | 2500  | 0.006           | -1445.382 | 36  | 2500  | 0.014 |
|              | 16    | -1912.851 | 912.872  | 6.893         | -1583.897 | 23  | 2500  | 0.009           | -1614.054 | 46  | 2500  | 0.018 |
|              | 17    | -1541.975 | 647.152  | 5.432         | -1240.124 | 29  | 2500  | 0.012           | -1272.624 | 31  | 2500  | 0.012 |
|              | 18    | -1769.755 | 651.990  | 5.645         | -1408.610 | 14  | 2500  | 0.006           | -1436.311 | 16  | 2500  | 0.006 |
|              | 19    | -2974.247 | 1053.073 | 12.573        | -2480.382 | 5   | 2500  | 0.002           | -2546.717 | 17  | 2500  | 0.007 |
|              | 20    | -1424.636 | 530.677  | 6.717         | -1166.824 | 34  | 2500  | 0.014           | -1195.361 | 56  | 2500  | 0.022 |
|              | 21    | -2362.057 | 796.718  | 9.692         | -1868.311 | 3   | 2500  | 0.001           | -1917.075 | 3   | 2500  | 0.001 |
|              | 22    | -1919.426 | 812.025  | 7.849         | -1558.326 | 12  | 2500  | 0.005           | -1601.696 | 17  | 2500  | 0.007 |
|              | 23    | -984.895  | 400.902  | 3.305         | -816.261  | 153 | 2500  | 0.061           | -832.797  | 197 | 2500  | 0.079 |
|              | 24    | -2570.272 | 1181.735 | 9.596         | -2099.401 | 4   | 2500  | 0.002           | -2144.357 | 12  | 2500  | 0.005 |
|              | 25    | -1720.457 | 830.673  | 6.242         | -1393.131 | 20  | 2500  | 0.008           | -1416.899 | 34  | 2500  | 0.014 |
|              | 26    | -2345.747 | 1027.118 | 7.609         | -1863.921 | 4   | 2500  | 0.002           | -1907.501 | 5   | 2500  | 0.002 |
|              | 27    | -1919.131 | 948.605  | 7.777         | -1602.148 | 41  | 2500  | 0.016           | -1634.771 | 60  | 2500  | 0.024 |
|              | 28    | -1458.952 | 635.443  | 5.683         | -1203.707 | 64  | 2500  | 0.026           | -1227.617 | 91  | 2500  | 0.036 |
|              | 29    | -1743.448 | 782.312  | 6.930         | -1411.351 | 19  | 2500  | 0.008           | -1440.849 | 33  | 2500  | 0.013 |
|              | 30    | -1201.719 | 614.202  | 4.248         | -1017.962 | 163 | 2500  | 0.065           | -1037.115 | 206 | 2500  | 0.082 |
|              | 31    | -2158.374 | 893.102  | 6.538         | -1750.564 | 9   | 2500  | 0.004           | -1777.164 | 27  | 2500  | 0.011 |
|              | 32    | -2342.766 | 1157.719 | 8.683         | -1983.270 | 22  | 2500  | 0.009           | -2033.561 | 47  | 2500  | 0.019 |
|              | 33    | -2785.252 | 1045.028 | 11.058        | -2277.534 | 4   | 2500  | 0.002           | -2343.396 | 7   | 2500  | 0.003 |
|              | 34    | -2098.357 | 1006.779 | 7.811         | -1699.343 | 14  | 2500  | 0.006           | -1737.035 | 12  | 2500  | 0.005 |
|              | 35    | -1464.785 | 614.082  | 6.416         | -1215.770 | 65  | 2500  | 0.026           | -1245.781 | 95  | 2500  | 0.038 |
|              | 36    | -1421.197 | 593.345  | 5.528         | -1145.576 | 17  | 2500  | 0.007           | -1173.565 | 38  | 2500  | 0.015 |
|              | 37    | -2659.194 | 1299.770 | 9.260         | -2286.161 | 42  | 2500  | 0.017           | -2335.245 | 74  | 2500  | 0.030 |
|              | 38    | -2200.233 | 723.467  | 7.963         | -1803.420 | 7   | 2500  | 0.003           | -1855.344 | 27  | 2500  | 0.011 |
|              | 39    | -1603.529 | 739.484  | 6.860         | -1339.967 | 51  | 2500  | 0.020           | -1371.282 | 74  | 2500  | 0.030 |
|              | 40    | -2333.211 | 1121.278 | 8.028         | -1975.845 | 43  | 2500  | 0.017           | -2018.658 | 69  | 2500  | 0.028 |
|              | 41    | -1690.693 | 715.101  | 6.689         | -1365.286 | 20  | 2500  | 0.008           | -1409.005 | 37  | 2500  | 0.015 |
|              | 42    | -1706.548 | 757.148  | 6.218         | -1422.012 | 61  | 2500  | 0.024           | -1456.713 | 83  | 2500  | 0.033 |
|              | 43    | -1146.380 | 466.354  | 3.778         | -956.640  | 115 | 2500  | 0.046           | -976.117  | 189 | 2500  | 0.076 |
|              | 44    | -2944.924 | 1027.622 | 13.108        | -2413.685 | 2   | 2500  | 0.001           | -2480.762 | 6   | 2500  | 0.002 |
|              | 45    | -2664.198 | 1378.932 | 11.553        | -2222.526 | 8   | 2500  | 0.003           | -2264.624 | 19  | 2500  | 0.008 |
|              | 46    | -1757.377 | 760.067  | 7.034         | -1417.649 | 6   | 2500  | 0.002           | -1447.150 | 18  | 2500  | 0.007 |
|              | 47    | -1041.564 | 525.637  | 3.500         | -880.035  | 188 | 2500  | 0.075           | -895.950  | 242 | 2500  | 0.097 |
|              | 48    | -1928.759 | 940.054  | 7.935         | -1566.695 | 16  | 2500  | 0.006           | -1607.769 | 24  | 2500  | 0.010 |
|              | 49    | -1579.966 | 723.292  | 6.778         | -1299.262 | 34  | 2500  | 0.014           | -1327.637 | 51  | 2500  | 0.020 |
|              | 50    | -1572.418 | 759.078  | 4.639         | -1277.379 | 44  | 2500  | 0.018           | -1296.684 | 58  | 2500  | 0.023 |
|              | 51    | -2786.282 | 1220.602 | 9.969         | -2354.639 | 12  | 2500  | 0.005           | -2407.898 | 43  | 2500  | 0.017 |

|           |                  |            |          |        |            |      |        |       |            |      |        |       |
|-----------|------------------|------------|----------|--------|------------|------|--------|-------|------------|------|--------|-------|
|           | 52               | -1444.945  | 449.765  | 5.012  | -1129.274  | 15   | 2500   | 0.006 | -1159.936  | 25   | 2500   | 0.010 |
|           | 53               | -2226.674  | 1084.402 | 9.430  | -1795.494  | 7    | 2500   | 0.003 | -1837.321  | 10   | 2500   | 0.004 |
|           | 54               | -3068.582  | 1463.738 | 12.641 | -2552.662  | 4    | 2500   | 0.002 | -2619.577  | 11   | 2500   | 0.004 |
|           | 55               | -2509.801  | 1241.270 | 8.794  | -2101.046  | 21   | 2500   | 0.008 | -2140.327  | 32   | 2500   | 0.013 |
|           | 56               | -2714.756  | 1238.110 | 9.008  | -2263.245  | 16   | 2500   | 0.006 | -2311.052  | 25   | 2500   | 0.010 |
|           | 57               | -1817.081  | 893.776  | 6.752  | -1437.310  | 6    | 2500   | 0.002 | -1464.599  | 16   | 2500   | 0.006 |
|           | 58               | -1264.384  | 590.837  | 3.833  | -1025.296  | 58   | 2500   | 0.023 | -1046.658  | 104  | 2500   | 0.042 |
|           | 59               | -1648.488  | 761.133  | 5.390  | -1369.407  | 40   | 2500   | 0.016 | -1383.425  | 87   | 2500   | 0.035 |
|           | 60               | -2399.422  | 1184.564 | 8.389  | -2028.660  | 27   | 2500   | 0.011 | -2065.527  | 55   | 2500   | 0.022 |
|           | 61               | -2278.177  | 1114.621 | 8.597  | -1905.739  | 16   | 2500   | 0.006 | -1934.529  | 35   | 2500   | 0.014 |
|           | 62               | -1836.265  | 568.917  | 7.438  | -1472.166  | 10   | 2500   | 0.004 | -1507.012  | 17   | 2500   | 0.007 |
|           | 63               | -2029.594  | 1055.902 | 8.789  | -1665.947  | 18   | 2500   | 0.007 | -1710.121  | 26   | 2500   | 0.010 |
|           | 64               | -2909.453  | 1384.597 | 14.137 | -2423.005  | 4    | 2500   | 0.002 | -2490.433  | 15   | 2500   | 0.006 |
|           | 65               | -2723.828  | 1280.771 | 12.566 | -2285.381  | 13   | 2500   | 0.005 | -2340.859  | 22   | 2500   | 0.009 |
|           | 66               | -2036.141  | 965.322  | 7.209  | -1701.472  | 34   | 2500   | 0.014 | -1738.913  | 52   | 2500   | 0.021 |
|           | 67               | -1346.225  | 703.177  | 5.765  | -1077.182  | 36   | 2500   | 0.014 | -1101.784  | 48   | 2500   | 0.019 |
|           | 68               | -1543.419  | 773.249  | 5.195  | -1261.994  | 49   | 2500   | 0.020 | -1288.573  | 65   | 2500   | 0.026 |
|           | 69               | -2941.070  | 1402.990 | 12.994 | -2514.440  | 22   | 2500   | 0.009 | -2568.859  | 32   | 2500   | 0.013 |
|           | 70               | -1721.328  | 782.929  | 5.675  | -1416.154  | 35   | 2500   | 0.014 | -1444.390  | 59   | 2500   | 0.024 |
|           | 71               | -1766.838  | 757.257  | 8.494  | -1428.659  | 11   | 2500   | 0.004 | -1458.479  | 17   | 2500   | 0.007 |
|           | 72               | -3269.701  | 1572.628 | 13.021 | -2706.831  | 5    | 2500   | 0.002 | -2764.998  | 8    | 2500   | 0.003 |
|           | 73               | -2172.017  | 1117.498 | 9.011  | -1782.650  | 12   | 2500   | 0.005 | -1822.050  | 24   | 2500   | 0.010 |
|           | 74               | -1926.245  | 931.200  | 6.808  | -1598.272  | 33   | 2500   | 0.013 | -1633.840  | 59   | 2500   | 0.024 |
|           | 75               | -3249.748  | 1524.272 | 13.010 | -2665.975  | 2    | 2500   | 0.001 | -2727.422  | 4    | 2500   | 0.002 |
|           | 76               | -1058.959  | 430.949  | 3.775  | -867.185   | 78   | 2500   | 0.031 | -884.450   | 119  | 2500   | 0.048 |
|           | 77               | -2512.683  | 1233.155 | 9.833  | -2110.627  | 20   | 2500   | 0.008 | -2150.319  | 27   | 2500   | 0.011 |
|           | 78               | -3945.702  | 1725.871 | 16.373 | -3217.985  | 0    | 2500   | 0.000 | -3290.091  | 2    | 2500   | 0.001 |
|           | 79               | -1959.356  | 971.931  | 8.467  | -1636.569  | 39   | 2500   | 0.016 | -1680.389  | 64   | 2500   | 0.026 |
|           | 80               | -2625.893  | 1385.136 | 9.994  | -2223.561  | 29   | 2500   | 0.012 | -2269.768  | 41   | 2500   | 0.016 |
|           | 81               | -3311.094  | 1415.752 | 14.391 | -2730.508  | 0    | 2500   | 0.000 | -2798.332  | 3    | 2500   | 0.001 |
|           | 82               | -1484.252  | 697.042  | 5.375  | -1189.031  | 35   | 2500   | 0.014 | -1213.743  | 33   | 2500   | 0.013 |
|           | 83               | -1402.031  | 660.781  | 4.481  | -1191.740  | 144  | 2500   | 0.058 | -1214.360  | 174  | 2500   | 0.070 |
|           | 84               | -3111.383  | 1470.079 | 12.734 | -2548.499  | 1    | 2500   | 0.000 | -2614.015  | 5    | 2500   | 0.002 |
|           | 85               | -1775.337  | 821.480  | 6.483  | -1521.382  | 88   | 2500   | 0.035 | -1545.493  | 134  | 2500   | 0.054 |
|           | 86               | -1910.749  | 822.925  | 8.542  | -1539.975  | 6    | 2500   | 0.002 | -1577.652  | 19   | 2500   | 0.008 |
|           | 87               | -1708.003  | 802.386  | 5.466  | -1396.807  | 31   | 2500   | 0.012 | -1423.645  | 39   | 2500   | 0.016 |
|           | 88               | -1804.006  | 810.026  | 6.126  | -1491.349  | 36   | 2500   | 0.014 | -1528.354  | 80   | 2500   | 0.032 |
|           | 89               | -2844.672  | 1148.776 | 12.410 | -2367.743  | 6    | 2500   | 0.002 | -2432.474  | 16   | 2500   | 0.006 |
|           | 90               | -1906.665  | 890.129  | 6.401  | -1537.987  | 17   | 2500   | 0.007 | -1570.235  | 29   | 2500   | 0.012 |
|           | 91               | -1859.163  | 796.605  | 5.855  | -1501.546  | 17   | 2500   | 0.007 | -1531.449  | 40   | 2500   | 0.016 |
|           | 92               | -1313.510  | 609.270  | 4.991  | -1085.693  | 67   | 2500   | 0.027 | -1110.814  | 104  | 2500   | 0.042 |
|           | 93               | -1676.035  | 732.626  | 6.653  | -1393.958  | 44   | 2500   | 0.018 | -1416.198  | 64   | 2500   | 0.026 |
|           | 94               | -1029.168  | 333.754  | 3.868  | -852.807   | 106  | 2500   | 0.042 | -869.654   | 173  | 2500   | 0.069 |
|           | 95               | -1094.339  | 455.371  | 3.600  | -926.321   | 165  | 2500   | 0.066 | -944.996   | 231  | 2500   | 0.092 |
|           | 96               | -1771.501  | 765.982  | 7.608  | -1440.924  | 22   | 2500   | 0.009 | -1482.271  | 32   | 2500   | 0.013 |
|           | 97               | -1079.911  | 436.833  | 3.470  | -903.060   | 156  | 2500   | 0.062 | -917.151   | 187  | 2500   | 0.075 |
|           | 98               | -1153.675  | 515.297  | 4.855  | -941.972   | 72   | 2500   | 0.029 | -961.425   | 106  | 2500   | 0.042 |
|           | 99               | -2280.880  | 1127.133 | 7.515  | -1895.857  | 24   | 2500   | 0.010 | -1927.206  | 40   | 2500   | 0.016 |
|           | 100              | -3042.410  | 1459.218 | 13.253 | -2508.276  | 2    | 2500   | 0.001 | -2570.728  | 4    | 2500   | 0.002 |
|           | <b>Mean</b>      | -2020.004  | 910.441  | 7.785  | -1664.570  | 35.5 | 2500.0 | 0.014 | -1701.725  | 54.4 | 2500.0 | 0.022 |
|           | <b>Std. Err.</b> | 62.805     | 30.469   | 0.296  | 52.648     | 4.2  | 0.0    | 0.002 | 54.033     | 5.5  | 0.0    | 0.002 |
| Arachnida | 1                | -11027.774 | 1932.088 | 17.249 | -9641.967  | 1    | 2500   | 0.000 | -9826.777  | 0    | 2500   | 0.000 |
|           | 2                | -11181.244 | 2131.581 | 17.312 | -9664.430  | 0    | 2500   | 0.000 | -9853.556  | 1    | 2500   | 0.000 |
|           | 3                | -9804.227  | 1896.921 | 14.535 | -8640.754  | 2    | 2500   | 0.001 | -8815.375  | 3    | 2500   | 0.001 |
|           | 4                | -9337.246  | 1784.743 | 14.019 | -8161.627  | 1    | 2500   | 0.000 | -8322.918  | 3    | 2500   | 0.001 |
|           | 5                | -10085.620 | 1862.551 | 15.070 | -8890.081  | 1    | 2500   | 0.000 | -9075.978  | 4    | 2500   | 0.002 |
|           | 6                | -9610.374  | 1922.458 | 14.263 | -8539.524  | 0    | 2500   | 0.000 | -8708.213  | 10   | 2500   | 0.004 |
|           | 7                | -9282.612  | 1664.795 | 14.158 | -8200.217  | 1    | 2500   | 0.000 | -8359.447  | 0    | 2500   | 0.000 |
|           | 8                | -10207.736 | 1912.458 | 15.045 | -8904.279  | 0    | 2500   | 0.000 | -9087.817  | 0    | 2500   | 0.000 |
|           | 9                | -11524.398 | 2227.053 | 17.567 | -10001.576 | 0    | 2500   | 0.000 | -10209.205 | 0    | 2500   | 0.000 |
|           | 10               | -12468.705 | 2221.030 | 19.845 | -10680.151 | 0    | 2500   | 0.000 | -10873.327 | 0    | 2500   | 0.000 |
|           | 11               | -10671.763 | 1987.815 | 16.719 | -9291.185  | 0    | 2500   | 0.000 | -9458.678  | 1    | 2500   | 0.000 |
|           | 12               | -12770.689 | 2383.811 | 20.041 | -11081.330 | 0    | 2500   | 0.000 | -11293.429 | 0    | 2500   | 0.000 |
|           | 13               | -10498.151 | 1748.725 | 16.746 | -9173.857  | 0    | 2500   | 0.000 | -9348.855  | 1    | 2500   | 0.000 |
|           | 14               | -10498.151 | 1748.725 | 16.746 | -9173.857  | 0    | 2500   | 0.000 | -9348.855  | 1    | 2500   | 0.000 |
|           | 15               | -10117.671 | 1961.197 | 15.044 | -8958.054  | 1    | 2500   | 0.000 | -9142.619  | 3    | 2500   | 0.001 |

|    |            |          |        |            |    |      |       |            |    |      |       |
|----|------------|----------|--------|------------|----|------|-------|------------|----|------|-------|
| 16 | -10973.434 | 2111.038 | 16.987 | -9569.648  | 0  | 2500 | 0.000 | -9760.186  | 0  | 2500 | 0.000 |
| 17 | -11053.498 | 2231.510 | 16.810 | -9580.507  | 0  | 2500 | 0.000 | -9777.436  | 0  | 2500 | 0.000 |
| 18 | -9962.351  | 1856.036 | 14.732 | -8820.859  | 2  | 2500 | 0.001 | -8992.040  | 3  | 2500 | 0.001 |
| 19 | -10085.620 | 1862.551 | 15.070 | -8890.081  | 1  | 2500 | 0.000 | -9075.978  | 4  | 2500 | 0.002 |
| 20 | -11043.547 | 2287.684 | 16.796 | -9634.944  | 0  | 2500 | 0.000 | -9831.044  | 0  | 2500 | 0.000 |
| 21 | -8818.979  | 1633.710 | 13.425 | -7694.681  | 1  | 2500 | 0.000 | -7854.157  | 2  | 2500 | 0.001 |
| 22 | -9835.671  | 1725.688 | 14.672 | -8791.789  | 1  | 2500 | 0.000 | -8960.664  | 10 | 2500 | 0.004 |
| 23 | -11196.986 | 2174.566 | 17.249 | -9762.168  | 0  | 2500 | 0.000 | -9951.392  | 0  | 2500 | 0.000 |
| 24 | -10681.271 | 1823.932 | 16.762 | -9388.373  | 0  | 2500 | 0.000 | -9571.987  | 2  | 2500 | 0.001 |
| 25 | -11057.998 | 1944.250 | 17.256 | -9645.459  | 0  | 2500 | 0.000 | -9845.079  | 0  | 2500 | 0.000 |
| 26 | -11371.323 | 1913.212 | 18.755 | -9843.678  | 0  | 2500 | 0.000 | -10022.510 | 0  | 2500 | 0.000 |
| 27 | -11140.892 | 2033.173 | 17.301 | -9689.500  | 0  | 2500 | 0.000 | -9846.557  | 0  | 2500 | 0.000 |
| 28 | -12063.478 | 2444.976 | 18.114 | -10491.665 | 0  | 2500 | 0.000 | -10693.167 | 0  | 2500 | 0.000 |
| 29 | -9315.642  | 1803.826 | 13.952 | -8246.201  | 3  | 2500 | 0.001 | -8397.734  | 7  | 2500 | 0.003 |
| 30 | -10346.271 | 1689.467 | 16.481 | -9075.948  | 1  | 2500 | 0.000 | -9248.812  | 1  | 2500 | 0.000 |
| 31 | -10735.498 | 2058.551 | 16.595 | -9201.864  | 0  | 2500 | 0.000 | -9383.266  | 0  | 2500 | 0.000 |
| 32 | -11359.757 | 2068.564 | 17.542 | -9946.461  | 0  | 2500 | 0.000 | -10148.713 | 0  | 2500 | 0.000 |
| 33 | -11887.292 | 2059.640 | 19.338 | -10239.857 | 0  | 2500 | 0.000 | -10429.242 | 0  | 2500 | 0.000 |
| 34 | -9873.195  | 1752.611 | 14.664 | -8800.403  | 2  | 2500 | 0.001 | -8961.925  | 3  | 2500 | 0.001 |
| 35 | -11359.757 | 2068.564 | 17.542 | -9946.461  | 0  | 2500 | 0.000 | -10148.713 | 0  | 2500 | 0.000 |
| 36 | -10520.691 | 2071.835 | 15.291 | -9314.278  | 0  | 2500 | 0.000 | -9486.345  | 2  | 2500 | 0.001 |
| 37 | -12426.041 | 2227.205 | 19.765 | -10764.521 | 0  | 2500 | 0.000 | -10960.325 | 0  | 2500 | 0.000 |
| 38 | -11690.950 | 2217.089 | 17.899 | -10098.587 | 0  | 2500 | 0.000 | -10275.439 | 0  | 2500 | 0.000 |
| 39 | -10654.125 | 1944.625 | 16.779 | -9191.397  | 0  | 2500 | 0.000 | -9378.826  | 1  | 2500 | 0.000 |
| 40 | -11532.734 | 2315.860 | 17.559 | -10082.112 | 0  | 2500 | 0.000 | -10278.758 | 0  | 2500 | 0.000 |
| 41 | -9742.254  | 1960.730 | 14.174 | -8575.438  | 2  | 2500 | 0.001 | -8762.574  | 3  | 2500 | 0.001 |
| 42 | -10069.350 | 2107.327 | 14.498 | -8899.861  | 1  | 2500 | 0.000 | -9091.380  | 7  | 2500 | 0.003 |
| 43 | -10041.954 | 2104.609 | 14.486 | -8892.289  | 3  | 2500 | 0.001 | -9061.361  | 5  | 2500 | 0.002 |
| 44 | -10671.763 | 1987.815 | 16.719 | -9291.185  | 0  | 2500 | 0.000 | -9458.678  | 1  | 2500 | 0.000 |
| 45 | -11013.751 | 2183.321 | 16.824 | -9582.641  | 0  | 2500 | 0.000 | -9757.896  | 0  | 2500 | 0.000 |
| 46 | -10396.258 | 1693.807 | 16.569 | -9027.906  | 0  | 2500 | 0.000 | -9192.671  | 0  | 2500 | 0.000 |
| 47 | -10735.498 | 2058.551 | 16.595 | -9201.864  | 0  | 2500 | 0.000 | -9383.266  | 0  | 2500 | 0.000 |
| 48 | -9337.246  | 1784.743 | 14.019 | -8161.627  | 1  | 2500 | 0.000 | -8322.918  | 3  | 2500 | 0.001 |
| 49 | -11678.820 | 2237.167 | 17.823 | -10150.402 | 0  | 2500 | 0.000 | -10352.233 | 1  | 2500 | 0.000 |
| 50 | -12255.928 | 2193.893 | 19.538 | -10573.748 | 0  | 2500 | 0.000 | -10784.481 | 0  | 2500 | 0.000 |
| 51 | -11895.901 | 2079.827 | 19.253 | -10307.991 | 0  | 2500 | 0.000 | -10515.524 | 0  | 2500 | 0.000 |
| 52 | -11245.996 | 2221.412 | 17.137 | -9650.701  | 0  | 2500 | 0.000 | -9846.471  | 0  | 2500 | 0.000 |
| 53 | -12468.705 | 2221.030 | 19.845 | -10680.151 | 0  | 2500 | 0.000 | -10873.327 | 0  | 2500 | 0.000 |
| 54 | -9285.958  | 1784.076 | 13.935 | -8230.238  | 1  | 2500 | 0.000 | -8391.754  | 5  | 2500 | 0.002 |
| 55 | -8993.813  | 1430.666 | 13.823 | -8005.756  | 5  | 2500 | 0.002 | -8165.486  | 8  | 2500 | 0.003 |
| 56 | -11027.774 | 1932.088 | 17.249 | -9641.967  | 1  | 2500 | 0.000 | -9826.777  | 0  | 2500 | 0.000 |
| 57 | -9789.326  | 1820.070 | 14.733 | -8655.910  | 0  | 2500 | 0.000 | -8826.911  | 4  | 2500 | 0.002 |
| 58 | -10270.574 | 1889.963 | 15.314 | -9042.784  | 1  | 2500 | 0.000 | -9222.478  | 3  | 2500 | 0.001 |
| 59 | -9029.141  | 1458.079 | 13.823 | -8012.770  | 2  | 2500 | 0.001 | -8162.072  | 5  | 2500 | 0.002 |
| 60 | -8661.538  | 1757.632 | 11.869 | -7816.972  | 15 | 2500 | 0.006 | -7950.649  | 41 | 2500 | 0.016 |
| 61 | -9102.901  | 1723.799 | 12.668 | -8214.819  | 10 | 2500 | 0.004 | -8357.563  | 34 | 2500 | 0.014 |
| 62 | -9835.671  | 1725.688 | 14.672 | -8791.789  | 1  | 2500 | 0.000 | -8960.664  | 10 | 2500 | 0.004 |
| 63 | -10891.884 | 1854.715 | 17.069 | -9490.400  | 0  | 2500 | 0.000 | -9659.672  | 0  | 2500 | 0.000 |
| 64 | -8335.018  | 1497.466 | 11.722 | -7473.892  | 8  | 2500 | 0.003 | -7609.868  | 31 | 2500 | 0.012 |
| 65 | -9851.003  | 1941.775 | 14.528 | -8650.400  | 0  | 2500 | 0.000 | -8819.741  | 2  | 2500 | 0.001 |
| 66 | -10328.912 | 1967.617 | 15.283 | -9086.348  | 0  | 2500 | 0.000 | -9255.055  | 0  | 2500 | 0.000 |
| 67 | -9102.901  | 1723.799 | 12.668 | -8214.819  | 10 | 2500 | 0.004 | -8357.563  | 34 | 2500 | 0.014 |
| 68 | -10041.954 | 2104.609 | 14.486 | -8892.289  | 3  | 2500 | 0.001 | -9061.361  | 5  | 2500 | 0.002 |
| 69 | -9254.685  | 1773.868 | 13.676 | -8047.670  | 0  | 2500 | 0.000 | -8198.181  | 0  | 2500 | 0.000 |
| 70 | -9504.599  | 1589.286 | 14.362 | -8485.104  | 4  | 2500 | 0.002 | -8629.385  | 11 | 2500 | 0.004 |
| 71 | -9298.786  | 1643.651 | 14.249 | -8123.540  | 0  | 2500 | 0.000 | -8280.943  | 1  | 2500 | 0.000 |
| 72 | -11242.023 | 2027.886 | 17.286 | -9877.420  | 0  | 2500 | 0.000 | -10062.069 | 0  | 2500 | 0.000 |
| 73 | -11140.892 | 2033.173 | 17.301 | -9689.500  | 0  | 2500 | 0.000 | -9846.557  | 0  | 2500 | 0.000 |
| 74 | -11681.834 | 2043.319 | 19.012 | -10149.442 | 0  | 2500 | 0.000 | -10354.777 | 0  | 2500 | 0.000 |
| 75 | -10361.280 | 1669.165 | 16.582 | -9021.209  | 0  | 2500 | 0.000 | -9177.863  | 0  | 2500 | 0.000 |
| 76 | -10117.671 | 1961.197 | 15.044 | -8958.054  | 1  | 2500 | 0.000 | -9142.619  | 3  | 2500 | 0.001 |
| 77 | -10671.763 | 1987.815 | 16.719 | -9291.185  | 0  | 2500 | 0.000 | -9458.678  | 1  | 2500 | 0.000 |
| 78 | -10678.626 | 2039.604 | 16.517 | -9247.027  | 1  | 2500 | 0.000 | -9439.533  | 0  | 2500 | 0.000 |
| 79 | -10136.161 | 1917.811 | 15.056 | -8900.551  | 0  | 2500 | 0.000 | -9075.338  | 4  | 2500 | 0.002 |
| 80 | -8661.538  | 1757.632 | 11.869 | -7816.972  | 15 | 2500 | 0.006 | -7950.649  | 41 | 2500 | 0.016 |
| 81 | -9216.458  | 1743.289 | 13.676 | -8037.375  | 0  | 2500 | 0.000 | -8197.738  | 2  | 2500 | 0.001 |

|              |                  |            |          |        |            |     |        |       |            |     |        |       |
|--------------|------------------|------------|----------|--------|------------|-----|--------|-------|------------|-----|--------|-------|
|              | 82               | -10688.623 | 1967.034 | 16.789 | -9188.719  | 0   | 2500   | 0.000 | -9378.609  | 0   | 2500   | 0.000 |
|              | 83               | -12063.478 | 2444.976 | 18.114 | -10491.665 | 0   | 2500   | 0.000 | -10693.167 | 0   | 2500   | 0.000 |
|              | 84               | -8848.184  | 1624.036 | 12.401 | -7840.009  | 3   | 2500   | 0.001 | -7993.323  | 5   | 2500   | 0.002 |
|              | 85               | -9756.906  | 1938.738 | 14.253 | -8523.701  | 0   | 2500   | 0.000 | -8683.264  | 2   | 2500   | 0.001 |
|              | 86               | -9727.571  | 1929.448 | 14.238 | -8525.636  | 0   | 2500   | 0.000 | -8676.469  | 1   | 2500   | 0.000 |
|              | 87               | -9572.404  | 1768.307 | 14.471 | -8489.133  | 1   | 2500   | 0.000 | -8658.767  | 11  | 2500   | 0.004 |
|              | 88               | -11013.751 | 2183.321 | 16.824 | -9582.641  | 0   | 2500   | 0.000 | -9757.896  | 0   | 2500   | 0.000 |
|              | 89               | -9636.343  | 1723.339 | 14.413 | -8499.353  | 2   | 2500   | 0.001 | -8694.153  | 6   | 2500   | 0.002 |
|              | 90               | -8661.538  | 1757.632 | 11.869 | -7816.972  | 15  | 2500   | 0.006 | -7950.649  | 41  | 2500   | 0.016 |
|              | 91               | -12792.730 | 2387.307 | 20.073 | -11076.033 | 0   | 2500   | 0.000 | -11292.074 | 0   | 2500   | 0.000 |
|              | 92               | -9804.158  | 1781.105 | 14.743 | -8598.028  | 1   | 2500   | 0.000 | -8772.753  | 3   | 2500   | 0.001 |
|              | 93               | -11205.377 | 2186.031 | 17.146 | -9659.961  | 0   | 2500   | 0.000 | -9857.953  | 0   | 2500   | 0.000 |
|              | 94               | -8284.131  | 1439.791 | 11.729 | -7443.987  | 13  | 2500   | 0.005 | -7588.493  | 27  | 2500   | 0.011 |
|              | 95               | -10597.394 | 2035.499 | 15.624 | -9366.440  | 0   | 2500   | 0.000 | -9551.910  | 4   | 2500   | 0.002 |
|              | 96               | -11042.477 | 1908.594 | 17.327 | -9567.693  | 0   | 2500   | 0.000 | -9740.088  | 0   | 2500   | 0.000 |
|              | 97               | -10681.271 | 1823.932 | 16.762 | -9388.373  | 0   | 2500   | 0.000 | -9571.987  | 2   | 2500   | 0.001 |
|              | 98               | -9868.962  | 1921.728 | 14.608 | -8588.438  | 1   | 2500   | 0.000 | -8745.488  | 2   | 2500   | 0.001 |
|              | 99               | -11140.892 | 2033.173 | 17.301 | -9689.500  | 0   | 2500   | 0.000 | -9846.557  | 0   | 2500   | 0.000 |
|              | 100              | -12018.597 | 2390.515 | 18.125 | -10469.944 | 0   | 2500   | 0.000 | -10684.815 | 0   | 2500   | 0.000 |
|              | <b>Mean</b>      | -10455.463 | 1945.846 | 15.912 | -9153.826  | 1.4 | 2500.0 | 0.000 | -9329.885  | 4.3 | 2500.0 | 0.002 |
|              | <b>Std. Err.</b> | 104.012    | 22.464   | 0.204  | 82.979     | 0.3 | 0.0    | 0.000 | 84.588     | 0.9 | 0.0    | 0.000 |
| Malacostraca | 1                | -4833.935  | 2717.180 | 20.555 | -4184.077  | 4   | 2500   | 0.002 | -4269.157  | 18  | 2500   | 0.007 |
|              | 2                | -4151.055  | 2418.584 | 18.145 | -3575.953  | 8   | 2500   | 0.003 | -3646.770  | 17  | 2500   | 0.007 |
|              | 3                | -6803.217  | 3187.175 | 34.929 | -5643.022  | 0   | 2500   | 0.000 | -5787.108  | 0   | 2500   | 0.000 |
|              | 4                | -5438.202  | 3097.302 | 23.325 | -4697.983  | 2   | 2500   | 0.001 | -4796.480  | 4   | 2500   | 0.002 |
|              | 5                | -6398.393  | 3636.972 | 28.585 | -5493.655  | 0   | 2500   | 0.000 | -5617.375  | 0   | 2500   | 0.000 |
|              | 6                | -5698.305  | 3254.441 | 23.664 | -4973.998  | 3   | 2500   | 0.001 | -5071.153  | 13  | 2500   | 0.005 |
|              | 7                | -5502.996  | 3040.517 | 25.604 | -4678.921  | 0   | 2500   | 0.000 | -4781.840  | 1   | 2500   | 0.000 |
|              | 8                | -5698.305  | 3254.441 | 23.664 | -4973.998  | 3   | 2500   | 0.001 | -5071.153  | 13  | 2500   | 0.005 |
|              | 9                | -3925.308  | 2280.202 | 17.357 | -3367.550  | 13  | 2500   | 0.005 | -3429.534  | 20  | 2500   | 0.008 |
|              | 10               | -7987.676  | 4035.893 | 38.293 | -6724.947  | 0   | 2500   | 0.000 | -6866.269  | 0   | 2500   | 0.000 |
|              | 11               | -6879.342  | 3237.914 | 35.097 | -5722.788  | 0   | 2500   | 0.000 | -5862.206  | 0   | 2500   | 0.000 |
|              | 12               | -6398.393  | 3636.972 | 28.585 | -5493.655  | 0   | 2500   | 0.000 | -5617.375  | 0   | 2500   | 0.000 |
|              | 13               | -5525.039  | 3036.261 | 25.126 | -4722.160  | 0   | 2500   | 0.000 | -4830.370  | 1   | 2500   | 0.000 |
|              | 14               | -5685.901  | 3141.235 | 25.566 | -4864.416  | 0   | 2500   | 0.000 | -4963.478  | 3   | 2500   | 0.001 |
|              | 15               | -4677.042  | 2624.909 | 19.999 | -4024.204  | 3   | 2500   | 0.001 | -4099.618  | 13  | 2500   | 0.005 |
|              | 16               | -6710.384  | 3112.434 | 34.697 | -5580.590  | 0   | 2500   | 0.000 | -5704.762  | 0   | 2500   | 0.000 |
|              | 17               | -5525.039  | 3036.261 | 25.126 | -4722.160  | 0   | 2500   | 0.000 | -4830.370  | 1   | 2500   | 0.000 |
|              | 18               | -6414.328  | 3611.354 | 28.126 | -5538.204  | 0   | 2500   | 0.000 | -5645.360  | 7   | 2500   | 0.003 |
|              | 19               | -4754.757  | 2690.643 | 20.308 | -4108.152  | 3   | 2500   | 0.001 | -4188.083  | 13  | 2500   | 0.005 |
|              | 20               | -3102.057  | 1795.438 | 14.215 | -2616.010  | 10  | 2500   | 0.004 | -2669.677  | 22  | 2500   | 0.009 |
|              | 21               | -6686.001  | 3110.797 | 35.191 | -5520.048  | 0   | 2500   | 0.000 | -5672.310  | 0   | 2500   | 0.000 |
|              | 22               | -3167.508  | 1810.031 | 14.450 | -2683.897  | 7   | 2500   | 0.003 | -2728.378  | 8   | 2500   | 0.003 |
|              | 23               | -4494.994  | 2515.954 | 19.996 | -3844.418  | 2   | 2500   | 0.001 | -3930.632  | 14  | 2500   | 0.006 |
|              | 24               | -3248.807  | 1882.378 | 14.690 | -2742.116  | 7   | 2500   | 0.003 | -2799.047  | 14  | 2500   | 0.006 |
|              | 25               | -5601.707  | 3081.320 | 25.323 | -4788.304  | 0   | 2500   | 0.000 | -4905.181  | 3   | 2500   | 0.001 |
|              | 26               | -3000.946  | 1735.812 | 14.441 | -2506.697  | 7   | 2500   | 0.003 | -2562.698  | 21  | 2500   | 0.008 |
|              | 27               | -6414.328  | 3611.354 | 28.126 | -5538.204  | 0   | 2500   | 0.000 | -5645.360  | 7   | 2500   | 0.003 |
|              | 28               | -4519.457  | 2512.385 | 19.548 | -3887.043  | 5   | 2500   | 0.002 | -3973.633  | 21  | 2500   | 0.008 |
|              | 29               | -5448.220  | 3000.383 | 24.906 | -4665.939  | 1   | 2500   | 0.000 | -4758.185  | 7   | 2500   | 0.003 |
|              | 30               | -3167.508  | 1810.031 | 14.450 | -2683.897  | 7   | 2500   | 0.003 | -2728.378  | 8   | 2500   | 0.003 |
|              | 31               | -6803.217  | 3187.175 | 34.929 | -5643.022  | 0   | 2500   | 0.000 | -5787.108  | 0   | 2500   | 0.000 |
|              | 32               | -4151.055  | 2418.584 | 18.145 | -3575.953  | 8   | 2500   | 0.003 | -3646.770  | 17  | 2500   | 0.007 |
|              | 33               | -6710.384  | 3112.434 | 34.697 | -5580.590  | 0   | 2500   | 0.000 | -5704.762  | 0   | 2500   | 0.000 |
|              | 34               | -3245.764  | 1880.376 | 14.770 | -2759.396  | 12  | 2500   | 0.005 | -2816.455  | 29  | 2500   | 0.012 |
|              | 35               | -7054.603  | 3371.831 | 35.559 | -5870.891  | 0   | 2500   | 0.000 | -6027.383  | 0   | 2500   | 0.000 |
|              | 36               | -6974.609  | 3341.072 | 35.293 | -5807.519  | 0   | 2500   | 0.000 | -5933.626  | 0   | 2500   | 0.000 |
|              | 37               | -4494.994  | 2515.954 | 19.996 | -3844.418  | 2   | 2500   | 0.001 | -3930.632  | 14  | 2500   | 0.006 |
|              | 38               | -3000.946  | 1735.812 | 14.441 | -2506.697  | 7   | 2500   | 0.003 | -2562.698  | 21  | 2500   | 0.008 |
|              | 39               | -4602.556  | 2586.027 | 19.796 | -3977.854  | 8   | 2500   | 0.003 | -4046.224  | 8   | 2500   | 0.003 |
|              | 40               | -4580.021  | 2582.236 | 20.267 | -3917.500  | 4   | 2500   | 0.002 | -3999.732  | 5   | 2500   | 0.002 |
|              | 41               | -4677.042  | 2624.909 | 19.999 | -4024.204  | 3   | 2500   | 0.001 | -4099.618  | 13  | 2500   | 0.005 |
|              | 42               | -4519.457  | 2512.385 | 19.548 | -3887.043  | 5   | 2500   | 0.002 | -3973.633  | 21  | 2500   | 0.008 |
|              | 43               | -5438.202  | 3097.302 | 23.325 | -4697.983  | 2   | 2500   | 0.001 | -4796.480  | 4   | 2500   | 0.002 |
|              | 44               | -6803.217  | 3187.175 | 34.929 | -5643.022  | 0   | 2500   | 0.000 | -5787.108  | 0   | 2500   | 0.000 |
|              | 45               | -3321.667  | 1928.093 | 15.022 | -2828.543  | 7   | 2500   | 0.003 | -2882.354  | 14  | 2500   | 0.006 |

|                |                  |            |           |        |            |     |        |       |            |     |        |       |
|----------------|------------------|------------|-----------|--------|------------|-----|--------|-------|------------|-----|--------|-------|
|                | 46               | -4754.757  | 2690.643  | 20.308 | -4108.152  | 3   | 2500   | 0.001 | -4188.083  | 13  | 2500   | 0.005 |
|                | 47               | -3167.508  | 1810.031  | 14.450 | -2683.897  | 7   | 2500   | 0.003 | -2728.378  | 8   | 2500   | 0.003 |
|                | 48               | -6978.139  | 3348.017  | 35.341 | -5810.898  | 0   | 2500   | 0.000 | -5949.717  | 0   | 2500   | 0.000 |
|                | 49               | -3167.508  | 1810.031  | 14.450 | -2683.897  | 7   | 2500   | 0.003 | -2728.378  | 8   | 2500   | 0.003 |
|                | 50               | -4833.935  | 2717.180  | 20.555 | -4184.077  | 4   | 2500   | 0.002 | -4269.157  | 18  | 2500   | 0.007 |
|                | 51               | -5502.996  | 3040.517  | 25.604 | -4678.921  | 0   | 2500   | 0.000 | -4781.840  | 1   | 2500   | 0.000 |
|                | 52               | -6658.071  | 3780.076  | 28.877 | -5754.188  | 0   | 2500   | 0.000 | -5881.170  | 2   | 2500   | 0.001 |
|                | 53               | -4754.757  | 2690.643  | 20.308 | -4108.152  | 3   | 2500   | 0.001 | -4188.083  | 13  | 2500   | 0.005 |
|                | 54               | -4833.935  | 2717.180  | 20.555 | -4184.077  | 4   | 2500   | 0.002 | -4269.157  | 18  | 2500   | 0.007 |
|                | 55               | -3027.335  | 1760.535  | 13.976 | -2562.798  | 10  | 2500   | 0.004 | -2611.744  | 19  | 2500   | 0.008 |
|                | 56               | -3321.667  | 1928.093  | 15.022 | -2828.543  | 7   | 2500   | 0.003 | -2882.354  | 14  | 2500   | 0.006 |
|                | 57               | -3925.308  | 2280.202  | 17.357 | -3367.550  | 13  | 2500   | 0.005 | -3429.534  | 20  | 2500   | 0.008 |
|                | 58               | -5438.202  | 3097.302  | 23.325 | -4697.983  | 2   | 2500   | 0.001 | -4796.480  | 4   | 2500   | 0.002 |
|                | 59               | -3027.335  | 1760.535  | 13.976 | -2562.798  | 10  | 2500   | 0.004 | -2611.744  | 19  | 2500   | 0.008 |
|                | 60               | -6398.393  | 3636.972  | 28.585 | -5493.655  | 0   | 2500   | 0.000 | -5617.375  | 0   | 2500   | 0.000 |
|                | 61               | -6974.609  | 3341.072  | 35.293 | -5807.519  | 0   | 2500   | 0.000 | -5933.626  | 0   | 2500   | 0.000 |
|                | 62               | -6686.001  | 3110.797  | 35.191 | -5520.048  | 0   | 2500   | 0.000 | -5672.310  | 0   | 2500   | 0.000 |
|                | 63               | -6879.342  | 3237.914  | 35.097 | -5722.788  | 0   | 2500   | 0.000 | -5862.206  | 0   | 2500   | 0.000 |
|                | 64               | -4677.042  | 2624.909  | 19.999 | -4024.204  | 3   | 2500   | 0.001 | -4099.618  | 13  | 2500   | 0.005 |
|                | 65               | -7733.713  | 3839.371  | 37.608 | -6482.761  | 0   | 2500   | 0.000 | -6636.336  | 0   | 2500   | 0.000 |
|                | 66               | -5448.220  | 3000.383  | 24.906 | -4665.939  | 1   | 2500   | 0.000 | -4758.185  | 7   | 2500   | 0.003 |
|                | 67               | -3321.667  | 1928.093  | 15.022 | -2828.543  | 7   | 2500   | 0.003 | -2882.354  | 14  | 2500   | 0.006 |
|                | 68               | -6658.071  | 3780.076  | 28.877 | -5754.188  | 0   | 2500   | 0.000 | -5881.170  | 2   | 2500   | 0.001 |
|                | 69               | -3245.764  | 1880.376  | 14.770 | -2759.396  | 12  | 2500   | 0.005 | -2816.455  | 29  | 2500   | 0.012 |
|                | 70               | -4677.042  | 2624.909  | 19.999 | -4024.204  | 3   | 2500   | 0.001 | -4099.618  | 13  | 2500   | 0.005 |
|                | 71               | -5619.898  | 3194.404  | 23.340 | -4893.123  | 6   | 2500   | 0.002 | -4979.832  | 12  | 2500   | 0.005 |
|                | 72               | -6686.001  | 3110.797  | 35.191 | -5520.048  | 0   | 2500   | 0.000 | -5672.310  | 0   | 2500   | 0.000 |
|                | 73               | -6803.217  | 3187.175  | 34.929 | -5643.022  | 0   | 2500   | 0.000 | -5787.108  | 0   | 2500   | 0.000 |
|                | 74               | -4580.021  | 2582.236  | 20.267 | -3917.500  | 4   | 2500   | 0.002 | -3999.732  | 5   | 2500   | 0.002 |
|                | 75               | -4519.457  | 2512.385  | 19.548 | -3887.043  | 5   | 2500   | 0.002 | -3973.633  | 21  | 2500   | 0.008 |
|                | 76               | -5420.502  | 2975.848  | 25.366 | -4610.871  | 1   | 2500   | 0.000 | -4713.287  | 2   | 2500   | 0.001 |
|                | 77               | -5619.898  | 3194.404  | 23.340 | -4893.123  | 6   | 2500   | 0.002 | -4979.832  | 12  | 2500   | 0.005 |
|                | 78               | -6414.328  | 3611.354  | 28.126 | -5538.204  | 0   | 2500   | 0.000 | -5645.360  | 7   | 2500   | 0.003 |
|                | 79               | -4677.042  | 2624.909  | 19.999 | -4024.204  | 3   | 2500   | 0.001 | -4099.618  | 13  | 2500   | 0.005 |
|                | 80               | -4757.864  | 2691.283  | 20.245 | -4086.157  | 3   | 2500   | 0.001 | -4180.111  | 9   | 2500   | 0.004 |
|                | 81               | -6803.217  | 3187.175  | 34.929 | -5643.022  | 0   | 2500   | 0.000 | -5787.108  | 0   | 2500   | 0.000 |
|                | 82               | -5525.039  | 3036.261  | 25.126 | -4722.160  | 0   | 2500   | 0.000 | -4830.370  | 1   | 2500   | 0.000 |
|                | 83               | -4580.021  | 2582.236  | 20.267 | -3917.500  | 4   | 2500   | 0.002 | -3999.732  | 5   | 2500   | 0.002 |
|                | 84               | -6879.342  | 3237.914  | 35.097 | -5722.788  | 0   | 2500   | 0.000 | -5862.206  | 0   | 2500   | 0.000 |
|                | 85               | -5502.996  | 3040.517  | 25.604 | -4678.921  | 0   | 2500   | 0.000 | -4781.840  | 1   | 2500   | 0.000 |
|                | 86               | -5686.206  | 3152.209  | 25.634 | -4887.479  | 1   | 2500   | 0.000 | -4978.141  | 4   | 2500   | 0.002 |
|                | 87               | -6710.384  | 3112.434  | 34.697 | -5580.590  | 0   | 2500   | 0.000 | -5704.762  | 0   | 2500   | 0.000 |
|                | 88               | -7706.328  | 3818.835  | 38.080 | -6448.752  | 0   | 2500   | 0.000 | -6593.921  | 0   | 2500   | 0.000 |
|                | 89               | -5601.707  | 3081.320  | 25.323 | -4788.304  | 0   | 2500   | 0.000 | -4905.181  | 3   | 2500   | 0.001 |
|                | 90               | -3925.308  | 2280.202  | 17.357 | -3367.550  | 13  | 2500   | 0.005 | -3429.534  | 20  | 2500   | 0.008 |
|                | 91               | -6686.001  | 3110.797  | 35.191 | -5520.048  | 0   | 2500   | 0.000 | -5672.310  | 0   | 2500   | 0.000 |
|                | 92               | -5698.305  | 3254.441  | 23.664 | -4973.998  | 3   | 2500   | 0.001 | -5071.153  | 13  | 2500   | 0.005 |
|                | 93               | -7987.676  | 4035.893  | 38.293 | -6724.947  | 0   | 2500   | 0.000 | -6866.269  | 0   | 2500   | 0.000 |
|                | 94               | -3925.308  | 2280.202  | 17.357 | -3367.550  | 13  | 2500   | 0.005 | -3429.534  | 20  | 2500   | 0.008 |
|                | 95               | -4833.935  | 2717.180  | 20.555 | -4184.077  | 4   | 2500   | 0.002 | -4269.157  | 18  | 2500   | 0.007 |
|                | 96               | -6658.071  | 3780.076  | 28.877 | -5754.188  | 0   | 2500   | 0.000 | -5881.170  | 2   | 2500   | 0.001 |
|                | 97               | -6414.328  | 3611.354  | 28.126 | -5538.204  | 0   | 2500   | 0.000 | -5645.360  | 7   | 2500   | 0.003 |
|                | 98               | -4677.042  | 2624.909  | 19.999 | -4024.204  | 3   | 2500   | 0.001 | -4099.618  | 13  | 2500   | 0.005 |
|                | 99               | -4833.935  | 2717.180  | 20.555 | -4184.077  | 4   | 2500   | 0.002 | -4269.157  | 18  | 2500   | 0.007 |
|                | 100              | -3248.807  | 1882.378  | 14.690 | -2742.116  | 7   | 2500   | 0.003 | -2799.047  | 14  | 2500   | 0.006 |
|                | <b>Mean</b>      | -5293.104  | 2846.621  | 24.420 | -4502.146  | 3.2 | 2500.0 | 0.001 | -4599.280  | 8.5 | 2500.0 | 0.003 |
|                | <b>Std. Err.</b> | 134.182    | 59.529    | 0.736  | 111.284    | 0.4 | 0.0    | 0.000 | 114.278    | 0.8 | 0.0    | 0.000 |
| <b>Insecta</b> | 1                | -68503.388 | 28383.953 | 12.962 | -58437.104 | 0   | 2500   | 0.000 | -59331.925 | 0   | 2500   | 0.000 |
|                | 2                | -66953.998 | 29313.871 | 13.127 | -56734.511 | 0   | 2500   | 0.000 | -57630.679 | 0   | 2500   | 0.000 |
|                | 3                | -67442.725 | 28740.506 | 12.710 | -57365.792 | 0   | 2500   | 0.000 | -58177.218 | 0   | 2500   | 0.000 |
|                | 4                | -66128.991 | 28076.283 | 12.350 | -56187.908 | 0   | 2500   | 0.000 | -57030.326 | 0   | 2500   | 0.000 |
|                | 5                | -66039.101 | 28972.401 | 12.329 | -56154.573 | 0   | 2500   | 0.000 | -57009.953 | 0   | 2500   | 0.000 |
|                | 6                | -70814.798 | 30614.276 | 13.684 | -60053.431 | 0   | 2500   | 0.000 | -60966.817 | 0   | 2500   | 0.000 |
|                | 7                | -70862.842 | 26582.009 | 13.642 | -60587.728 | 0   | 2500   | 0.000 | -61619.931 | 0   | 2500   | 0.000 |
|                | 8                | -68198.662 | 29270.690 | 12.777 | -58255.731 | 0   | 2500   | 0.000 | -59103.519 | 0   | 2500   | 0.000 |
|                | 9                | -68696.889 | 29930.787 | 13.329 | -58272.292 | 0   | 2500   | 0.000 | -59169.252 | 0   | 2500   | 0.000 |

|    |            |           |        |            |   |      |       |            |   |      |       |
|----|------------|-----------|--------|------------|---|------|-------|------------|---|------|-------|
| 10 | -72633.908 | 28906.772 | 13.931 | -61885.955 | 0 | 2500 | 0.000 | -62887.997 | 0 | 2500 | 0.000 |
| 11 | -63128.103 | 27658.383 | 11.743 | -53666.966 | 0 | 2500 | 0.000 | -54483.420 | 0 | 2500 | 0.000 |
| 12 | -74620.555 | 29641.702 | 14.741 | -63493.052 | 0 | 2500 | 0.000 | -64551.274 | 0 | 2500 | 0.000 |
| 13 | -73621.761 | 32000.558 | 14.185 | -62309.539 | 0 | 2500 | 0.000 | -63232.777 | 0 | 2500 | 0.000 |
| 14 | -69171.561 | 29175.974 | 12.816 | -58906.904 | 0 | 2500 | 0.000 | -59779.482 | 0 | 2500 | 0.000 |
| 15 | -75560.308 | 32626.587 | 14.670 | -64200.094 | 0 | 2500 | 0.000 | -65206.697 | 0 | 2500 | 0.000 |
| 16 | -69204.537 | 28817.587 | 13.074 | -59040.334 | 0 | 2500 | 0.000 | -59950.599 | 0 | 2500 | 0.000 |
| 17 | -69678.353 | 29523.550 | 13.586 | -59373.767 | 0 | 2500 | 0.000 | -60301.092 | 0 | 2500 | 0.000 |
| 18 | -66434.882 | 27493.219 | 12.400 | -56620.463 | 0 | 2500 | 0.000 | -57472.503 | 0 | 2500 | 0.000 |
| 19 | -67906.818 | 28542.824 | 12.886 | -57768.893 | 0 | 2500 | 0.000 | -58659.156 | 0 | 2500 | 0.000 |
| 20 | -69019.743 | 25570.100 | 13.230 | -59060.191 | 0 | 2500 | 0.000 | -60014.948 | 0 | 2500 | 0.000 |
| 21 | -79250.314 | 31539.315 | 15.469 | -67410.036 | 0 | 2500 | 0.000 | -68527.862 | 0 | 2500 | 0.000 |
| 22 | -75022.791 | 33286.965 | 14.531 | -63599.643 | 0 | 2500 | 0.000 | -64560.669 | 0 | 2500 | 0.000 |
| 23 | -69485.145 | 28727.549 | 13.026 | -59352.353 | 0 | 2500 | 0.000 | -60251.491 | 0 | 2500 | 0.000 |
| 24 | -66923.737 | 29276.772 | 12.419 | -56678.063 | 0 | 2500 | 0.000 | -57542.954 | 0 | 2500 | 0.000 |
| 25 | -69993.664 | 29573.377 | 13.134 | -59501.723 | 0 | 2500 | 0.000 | -60393.460 | 0 | 2500 | 0.000 |
| 26 | -66916.401 | 29235.136 | 12.557 | -56911.383 | 0 | 2500 | 0.000 | -57742.112 | 0 | 2500 | 0.000 |
| 27 | -77511.104 | 30026.792 | 14.706 | -66258.595 | 0 | 2500 | 0.000 | -67320.088 | 0 | 2500 | 0.000 |
| 28 | -71943.174 | 30651.312 | 13.835 | -61067.483 | 0 | 2500 | 0.000 | -61969.640 | 0 | 2500 | 0.000 |
| 29 | -66798.499 | 28049.931 | 12.476 | -57218.902 | 0 | 2500 | 0.000 | -58098.173 | 0 | 2500 | 0.000 |
| 30 | -71849.976 | 30947.756 | 13.487 | -60909.335 | 0 | 2500 | 0.000 | -61863.898 | 0 | 2500 | 0.000 |
| 31 | -69928.127 | 26974.244 | 13.668 | -59975.483 | 0 | 2500 | 0.000 | -60979.158 | 0 | 2500 | 0.000 |
| 32 | -67451.162 | 29082.613 | 13.196 | -57506.698 | 0 | 2500 | 0.000 | -58406.240 | 0 | 2500 | 0.000 |
| 33 | -66735.451 | 29239.386 | 12.415 | -56674.913 | 0 | 2500 | 0.000 | -57537.352 | 0 | 2500 | 0.000 |
| 34 | -69331.386 | 30014.138 | 13.363 | -58681.953 | 0 | 2500 | 0.000 | -59557.148 | 0 | 2500 | 0.000 |
| 35 | -66823.312 | 28666.721 | 13.067 | -56734.953 | 0 | 2500 | 0.000 | -57639.686 | 0 | 2500 | 0.000 |
| 36 | -70159.582 | 30360.098 | 13.723 | -59637.184 | 0 | 2500 | 0.000 | -60582.253 | 0 | 2500 | 0.000 |
| 37 | -69696.798 | 30241.743 | 13.230 | -59682.008 | 0 | 2500 | 0.000 | -60569.153 | 0 | 2500 | 0.000 |
| 38 | -68487.753 | 28486.498 | 12.903 | -58637.576 | 0 | 2500 | 0.000 | -59508.283 | 0 | 2500 | 0.000 |
| 39 | -71010.405 | 30525.327 | 13.805 | -60226.787 | 0 | 2500 | 0.000 | -61201.606 | 0 | 2500 | 0.000 |
| 40 | -75962.264 | 33323.371 | 14.746 | -64345.283 | 0 | 2500 | 0.000 | -65278.816 | 0 | 2500 | 0.000 |
| 41 | -69837.057 | 30758.883 | 13.592 | -59108.338 | 0 | 2500 | 0.000 | -60028.391 | 0 | 2500 | 0.000 |
| 42 | -66449.537 | 25091.521 | 13.025 | -57165.880 | 0 | 2500 | 0.000 | -58156.769 | 0 | 2500 | 0.000 |
| 43 | -73857.599 | 32140.906 | 14.209 | -62768.279 | 0 | 2500 | 0.000 | -63701.361 | 0 | 2500 | 0.000 |
| 44 | -67566.432 | 28806.464 | 12.523 | -57539.415 | 0 | 2500 | 0.000 | -58441.493 | 0 | 2500 | 0.000 |
| 45 | -70446.005 | 30247.280 | 13.676 | -60004.696 | 0 | 2500 | 0.000 | -60912.826 | 0 | 2500 | 0.000 |
| 46 | -75129.736 | 29900.572 | 14.865 | -63963.216 | 0 | 2500 | 0.000 | -65028.089 | 0 | 2500 | 0.000 |
| 47 | -68156.497 | 29812.434 | 13.241 | -57958.340 | 0 | 2500 | 0.000 | -58858.307 | 0 | 2500 | 0.000 |
| 48 | -66352.799 | 29224.325 | 12.985 | -56335.203 | 0 | 2500 | 0.000 | -57207.126 | 0 | 2500 | 0.000 |
| 49 | -68874.700 | 29226.013 | 12.826 | -58709.104 | 0 | 2500 | 0.000 | -59616.825 | 0 | 2500 | 0.000 |
| 50 | -62541.166 | 25669.316 | 11.805 | -53598.740 | 0 | 2500 | 0.000 | -54432.867 | 0 | 2500 | 0.000 |
| 51 | -75543.158 | 29267.330 | 14.576 | -64719.831 | 0 | 2500 | 0.000 | -65754.220 | 0 | 2500 | 0.000 |
| 52 | -70956.785 | 31117.895 | 13.808 | -60139.484 | 0 | 2500 | 0.000 | -61055.080 | 0 | 2500 | 0.000 |
| 53 | -77488.565 | 30592.889 | 15.250 | -66095.536 | 0 | 2500 | 0.000 | -67152.056 | 0 | 2500 | 0.000 |
| 54 | -70337.987 | 29528.409 | 13.090 | -59973.775 | 0 | 2500 | 0.000 | -60885.689 | 0 | 2500 | 0.000 |
| 55 | -70154.205 | 29647.751 | 13.050 | -59752.384 | 0 | 2500 | 0.000 | -60659.962 | 0 | 2500 | 0.000 |
| 56 | -67061.931 | 28701.730 | 12.638 | -57190.993 | 0 | 2500 | 0.000 | -58063.595 | 0 | 2500 | 0.000 |
| 57 | -69873.165 | 30630.646 | 13.063 | -59344.949 | 0 | 2500 | 0.000 | -60175.787 | 0 | 2500 | 0.000 |
| 58 | -67244.353 | 29043.692 | 13.046 | -57202.053 | 0 | 2500 | 0.000 | -58040.184 | 0 | 2500 | 0.000 |
| 59 | -69676.708 | 30065.224 | 13.582 | -59254.235 | 0 | 2500 | 0.000 | -60135.150 | 0 | 2500 | 0.000 |
| 60 | -74073.144 | 32567.160 | 14.357 | -62981.014 | 0 | 2500 | 0.000 | -63976.214 | 0 | 2500 | 0.000 |
| 61 | -66404.893 | 28586.084 | 12.644 | -56864.596 | 0 | 2500 | 0.000 | -57730.566 | 0 | 2500 | 0.000 |
| 62 | -68793.045 | 28741.309 | 12.940 | -58865.536 | 0 | 2500 | 0.000 | -59773.898 | 0 | 2500 | 0.000 |
| 63 | -72957.845 | 32239.399 | 14.094 | -61637.133 | 0 | 2500 | 0.000 | -62585.274 | 0 | 2500 | 0.000 |
| 64 | -72223.018 | 28748.411 | 13.825 | -61602.455 | 0 | 2500 | 0.000 | -62583.867 | 0 | 2500 | 0.000 |
| 65 | -72270.164 | 31340.949 | 14.012 | -61235.098 | 0 | 2500 | 0.000 | -62166.910 | 0 | 2500 | 0.000 |
| 66 | -67340.646 | 29763.128 | 13.084 | -57184.229 | 0 | 2500 | 0.000 | -58024.321 | 0 | 2500 | 0.000 |
| 67 | -67405.048 | 28119.412 | 12.898 | -57515.945 | 0 | 2500 | 0.000 | -58435.233 | 0 | 2500 | 0.000 |
| 68 | -61375.546 | 24902.547 | 11.803 | -52911.384 | 0 | 2500 | 0.000 | -53758.853 | 0 | 2500 | 0.000 |
| 69 | -71262.105 | 30331.695 | 13.254 | -60495.320 | 0 | 2500 | 0.000 | -61389.697 | 0 | 2500 | 0.000 |
| 70 | -68475.179 | 29510.761 | 13.397 | -58096.938 | 0 | 2500 | 0.000 | -59021.654 | 0 | 2500 | 0.000 |
| 71 | -67706.961 | 28181.255 | 12.910 | -57892.168 | 0 | 2500 | 0.000 | -58759.166 | 0 | 2500 | 0.000 |
| 72 | -66925.317 | 27908.811 | 12.483 | -56964.361 | 0 | 2500 | 0.000 | -57893.026 | 0 | 2500 | 0.000 |
| 73 | -70559.745 | 27277.578 | 14.055 | -60320.000 | 0 | 2500 | 0.000 | -61350.981 | 0 | 2500 | 0.000 |
| 74 | -77932.240 | 34095.080 | 14.899 | -66399.755 | 0 | 2500 | 0.000 | -67367.752 | 0 | 2500 | 0.000 |
| 75 | -68936.730 | 28728.728 | 12.943 | -59029.281 | 0 | 2500 | 0.000 | -59925.612 | 0 | 2500 | 0.000 |

|                  |     |            |           |        |            |     |        |       |            |     |        |       |
|------------------|-----|------------|-----------|--------|------------|-----|--------|-------|------------|-----|--------|-------|
|                  | 76  | -72832.940 | 30790.097 | 13.777 | -62210.332 | 0   | 2500   | 0.000 | -63167.012 | 0   | 2500   | 0.000 |
|                  | 77  | -65226.597 | 28552.859 | 12.790 | -55249.667 | 0   | 2500   | 0.000 | -56129.103 | 0   | 2500   | 0.000 |
|                  | 78  | -70949.584 | 29119.532 | 13.298 | -60590.690 | 0   | 2500   | 0.000 | -61492.778 | 0   | 2500   | 0.000 |
|                  | 79  | -65370.548 | 27619.779 | 12.375 | -55796.647 | 0   | 2500   | 0.000 | -56685.919 | 0   | 2500   | 0.000 |
|                  | 80  | -73545.808 | 31290.600 | 14.215 | -62588.361 | 0   | 2500   | 0.000 | -63548.714 | 0   | 2500   | 0.000 |
|                  | 81  | -71048.389 | 29900.690 | 13.295 | -60472.890 | 0   | 2500   | 0.000 | -61455.411 | 0   | 2500   | 0.000 |
|                  | 82  | -74395.580 | 32138.748 | 14.472 | -63175.783 | 0   | 2500   | 0.000 | -64158.993 | 0   | 2500   | 0.000 |
|                  | 83  | -63034.974 | 27355.675 | 11.891 | -53600.064 | 0   | 2500   | 0.000 | -54409.803 | 0   | 2500   | 0.000 |
|                  | 84  | -66861.766 | 29331.582 | 12.456 | -56953.443 | 0   | 2500   | 0.000 | -57823.415 | 0   | 2500   | 0.000 |
|                  | 85  | -72267.174 | 30125.915 | 13.710 | -61769.448 | 0   | 2500   | 0.000 | -62697.461 | 0   | 2500   | 0.000 |
|                  | 86  | -73695.455 | 27756.473 | 14.143 | -63282.407 | 0   | 2500   | 0.000 | -64272.193 | 0   | 2500   | 0.000 |
|                  | 87  | -72822.949 | 31072.880 | 13.643 | -62050.658 | 0   | 2500   | 0.000 | -62979.980 | 0   | 2500   | 0.000 |
|                  | 88  | -68090.724 | 28952.011 | 12.790 | -58110.204 | 0   | 2500   | 0.000 | -59017.250 | 0   | 2500   | 0.000 |
|                  | 89  | -69292.921 | 28940.547 | 12.967 | -59199.733 | 0   | 2500   | 0.000 | -60034.887 | 0   | 2500   | 0.000 |
|                  | 90  | -69136.174 | 28594.402 | 13.025 | -59106.568 | 0   | 2500   | 0.000 | -60038.285 | 0   | 2500   | 0.000 |
|                  | 91  | -64520.445 | 27926.238 | 11.935 | -54821.395 | 0   | 2500   | 0.000 | -55680.237 | 0   | 2500   | 0.000 |
|                  | 92  | -68495.035 | 28798.086 | 12.916 | -58677.747 | 0   | 2500   | 0.000 | -59618.618 | 0   | 2500   | 0.000 |
|                  | 93  | -69646.198 | 30500.203 | 12.802 | -59013.913 | 0   | 2500   | 0.000 | -59876.392 | 0   | 2500   | 0.000 |
|                  | 94  | -67179.025 | 27725.113 | 12.822 | -57600.011 | 0   | 2500   | 0.000 | -58466.139 | 0   | 2500   | 0.000 |
|                  | 95  | -68270.414 | 28727.694 | 12.736 | -57971.731 | 0   | 2500   | 0.000 | -58817.330 | 0   | 2500   | 0.000 |
|                  | 96  | -70406.733 | 30637.993 | 13.777 | -59768.549 | 0   | 2500   | 0.000 | -60694.717 | 0   | 2500   | 0.000 |
|                  | 97  | -65814.917 | 24756.019 | 12.691 | -56356.288 | 0   | 2500   | 0.000 | -57319.212 | 0   | 2500   | 0.000 |
|                  | 98  | -72619.009 | 29976.283 | 13.648 | -61971.678 | 0   | 2500   | 0.000 | -62930.622 | 0   | 2500   | 0.000 |
|                  | 99  | -66816.432 | 29259.400 | 12.474 | -56829.484 | 0   | 2500   | 0.000 | -57705.362 | 0   | 2500   | 0.000 |
|                  | 100 | -72657.890 | 27846.826 | 14.247 | -62334.920 | 0   | 2500   | 0.000 | -63342.149 | 0   | 2500   | 0.000 |
| <b>Mean</b>      |     | -69730.907 | 29362.823 | 13.313 | -59397.079 | 0.0 | 2500.0 | 0.000 | -60315.204 | 0.0 | 2500.0 | 0.000 |
| <b>Std. Err.</b> |     | 344.867    | 172.368   | 0.079  | 291.293    | 0.0 | 0.0    | 0.000 | 296.265    | 0.0 | 0.0    | 0.000 |
| Chondrichthyes   | 1   | -9312.508  | 4637.415  | 36.441 | -7818.563  | 0   | 2500   | 0.000 | -8004.807  | 0   | 2500   | 0.000 |
|                  | 2   | -5993.754  | 2002.475  | 25.439 | -5145.095  | 0   | 2500   | 0.000 | -5295.018  | 3   | 2500   | 0.001 |
|                  | 3   | -9312.508  | 4637.415  | 36.441 | -7818.563  | 0   | 2500   | 0.000 | -8004.807  | 0   | 2500   | 0.000 |
|                  | 4   | -9386.271  | 4351.925  | 36.964 | -7867.094  | 0   | 2500   | 0.000 | -8059.577  | 0   | 2500   | 0.000 |
|                  | 5   | -5287.241  | 1774.502  | 24.277 | -4541.219  | 2   | 2500   | 0.001 | -4682.468  | 16  | 2500   | 0.006 |
|                  | 6   | -5748.254  | 1692.983  | 25.647 | -4923.797  | 1   | 2500   | 0.000 | -5073.955  | 0   | 2500   | 0.000 |
|                  | 7   | -6706.202  | 2379.270  | 27.587 | -5668.701  | 0   | 2500   | 0.000 | -5831.286  | 1   | 2500   | 0.000 |
|                  | 8   | -9348.589  | 4469.750  | 36.494 | -7865.516  | 0   | 2500   | 0.000 | -8053.057  | 0   | 2500   | 0.000 |
|                  | 9   | -10132.566 | 5113.868  | 39.275 | -8424.773  | 0   | 2500   | 0.000 | -8624.633  | 0   | 2500   | 0.000 |
|                  | 10  | -6360.157  | 2469.662  | 26.648 | -5369.718  | 1   | 2500   | 0.000 | -5514.502  | 1   | 2500   | 0.000 |
|                  | 11  | -5546.124  | 1969.104  | 24.695 | -4758.639  | 0   | 2500   | 0.000 | -4915.764  | 13  | 2500   | 0.005 |
|                  | 12  | -10132.566 | 5113.868  | 39.275 | -8424.773  | 0   | 2500   | 0.000 | -8624.633  | 0   | 2500   | 0.000 |
|                  | 13  | -5220.259  | 1599.580  | 24.741 | -4467.966  | 0   | 2500   | 0.000 | -4612.971  | 5   | 2500   | 0.002 |
|                  | 14  | -9247.197  | 4621.883  | 36.276 | -7703.281  | 0   | 2500   | 0.000 | -7893.577  | 0   | 2500   | 0.000 |
|                  | 15  | -6836.999  | 2523.502  | 27.768 | -5788.332  | 0   | 2500   | 0.000 | -5952.986  | 1   | 2500   | 0.000 |
|                  | 16  | -9407.221  | 4761.815  | 36.574 | -7907.212  | 0   | 2500   | 0.000 | -8083.033  | 0   | 2500   | 0.000 |
|                  | 17  | -6436.443  | 2463.812  | 26.987 | -5465.504  | 0   | 2500   | 0.000 | -5608.586  | 2   | 2500   | 0.001 |
|                  | 18  | -9539.432  | 4691.798  | 37.102 | -7984.065  | 0   | 2500   | 0.000 | -8176.438  | 0   | 2500   | 0.000 |
|                  | 19  | -6706.202  | 2379.270  | 27.587 | -5668.701  | 0   | 2500   | 0.000 | -5831.286  | 1   | 2500   | 0.000 |
|                  | 20  | -5134.641  | 1537.327  | 24.757 | -4401.078  | 0   | 2500   | 0.000 | -4547.307  | 10  | 2500   | 0.004 |
|                  | 21  | -6778.155  | 2564.936  | 27.771 | -5740.682  | 0   | 2500   | 0.000 | -5901.983  | 0   | 2500   | 0.000 |
|                  | 22  | -6800.867  | 2549.957  | 29.727 | -5761.835  | 0   | 2500   | 0.000 | -5941.456  | 0   | 2500   | 0.000 |
|                  | 23  | -10561.644 | 4791.703  | 44.366 | -8868.967  | 0   | 2500   | 0.000 | -9096.097  | 0   | 2500   | 0.000 |
|                  | 24  | -7764.240  | 3281.051  | 32.269 | -6549.930  | 0   | 2500   | 0.000 | -6715.776  | 0   | 2500   | 0.000 |
|                  | 25  | -5690.992  | 1909.005  | 24.856 | -4845.320  | 0   | 2500   | 0.000 | -5002.259  | 4   | 2500   | 0.002 |
|                  | 26  | -10251.300 | 4771.816  | 39.845 | -8565.503  | 0   | 2500   | 0.000 | -8767.345  | 0   | 2500   | 0.000 |
|                  | 27  | -6164.891  | 2203.492  | 26.479 | -5225.667  | 0   | 2500   | 0.000 | -5381.309  | 1   | 2500   | 0.000 |
|                  | 28  | -5748.254  | 1692.983  | 25.647 | -4923.797  | 1   | 2500   | 0.000 | -5073.955  | 0   | 2500   | 0.000 |
|                  | 29  | -10706.872 | 5116.648  | 44.286 | -9011.964  | 0   | 2500   | 0.000 | -9239.594  | 0   | 2500   | 0.000 |
|                  | 30  | -6985.476  | 2752.011  | 30.110 | -5939.731  | 0   | 2500   | 0.000 | -6103.713  | 0   | 2500   | 0.000 |
|                  | 31  | -6360.157  | 2469.662  | 26.648 | -5369.718  | 1   | 2500   | 0.000 | -5514.502  | 1   | 2500   | 0.000 |
|                  | 32  | -5675.256  | 1838.672  | 24.951 | -4870.669  | 1   | 2500   | 0.000 | -5027.643  | 7   | 2500   | 0.003 |
|                  | 33  | -6100.269  | 2229.219  | 26.390 | -5137.983  | 0   | 2500   | 0.000 | -5285.304  | 0   | 2500   | 0.000 |
|                  | 34  | -5502.725  | 1891.498  | 24.474 | -4721.961  | 0   | 2500   | 0.000 | -4865.830  | 12  | 2500   | 0.005 |
|                  | 35  | -9240.841  | 4659.419  | 36.362 | -7686.650  | 0   | 2500   | 0.000 | -7870.971  | 0   | 2500   | 0.000 |
|                  | 36  | -11372.523 | 5910.954  | 44.770 | -9508.165  | 0   | 2500   | 0.000 | -9721.558  | 0   | 2500   | 0.000 |
|                  | 37  | -9251.875  | 4646.136  | 36.364 | -7731.485  | 0   | 2500   | 0.000 | -7922.942  | 0   | 2500   | 0.000 |
|                  | 38  | -11517.300 | 5452.304  | 47.095 | -9645.573  | 0   | 2500   | 0.000 | -9875.001  | 0   | 2500   | 0.000 |
|                  | 39  | -6626.500  | 2494.654  | 27.211 | -5599.973  | 0   | 2500   | 0.000 | -5757.855  | 0   | 2500   | 0.000 |

|             |                  |            |          |        |            |     |        |       |            |     |        |       |
|-------------|------------------|------------|----------|--------|------------|-----|--------|-------|------------|-----|--------|-------|
|             | 40               | -7764.240  | 3281.051 | 32.269 | -6549.930  | 0   | 2500   | 0.000 | -6715.776  | 0   | 2500   | 0.000 |
|             | 41               | -5161.218  | 1434.376 | 24.978 | -4429.727  | 1   | 2500   | 0.000 | -4575.298  | 7   | 2500   | 0.003 |
|             | 42               | -5523.246  | 1595.715 | 25.386 | -4717.115  | 0   | 2500   | 0.000 | -4865.889  | 3   | 2500   | 0.001 |
|             | 43               | -5923.919  | 1866.686 | 25.773 | -5045.219  | 1   | 2500   | 0.000 | -5202.159  | 3   | 2500   | 0.001 |
|             | 44               | -5386.850  | 1717.195 | 24.993 | -4601.710  | 2   | 2500   | 0.001 | -4756.672  | 3   | 2500   | 0.001 |
|             | 45               | -6436.443  | 2463.812 | 26.987 | -5465.504  | 0   | 2500   | 0.000 | -5608.586  | 2   | 2500   | 0.001 |
|             | 46               | -9407.221  | 4761.815 | 36.574 | -7907.212  | 0   | 2500   | 0.000 | -8083.033  | 0   | 2500   | 0.000 |
|             | 47               | -9247.197  | 4621.883 | 36.276 | -7703.281  | 0   | 2500   | 0.000 | -7893.577  | 0   | 2500   | 0.000 |
|             | 48               | -9240.841  | 4659.419 | 36.362 | -7686.650  | 0   | 2500   | 0.000 | -7870.971  | 0   | 2500   | 0.000 |
|             | 49               | -5949.178  | 2060.767 | 25.389 | -5100.576  | 2   | 2500   | 0.001 | -5248.517  | 2   | 2500   | 0.001 |
|             | 50               | -5993.754  | 2002.475 | 25.439 | -5145.095  | 0   | 2500   | 0.000 | -5295.018  | 3   | 2500   | 0.001 |
|             | 51               | -9655.564  | 4629.806 | 37.668 | -8102.030  | 0   | 2500   | 0.000 | -8283.258  | 0   | 2500   | 0.000 |
|             | 52               | -9287.634  | 4471.478 | 36.371 | -7777.117  | 0   | 2500   | 0.000 | -7958.555  | 0   | 2500   | 0.000 |
|             | 53               | -6985.476  | 2752.011 | 30.110 | -5939.731  | 0   | 2500   | 0.000 | -6103.713  | 0   | 2500   | 0.000 |
|             | 54               | -5752.312  | 1897.911 | 25.291 | -4881.392  | 0   | 2500   | 0.000 | -5032.117  | 0   | 2500   | 0.000 |
|             | 55               | -5594.641  | 1770.905 | 25.464 | -4797.787  | 1   | 2500   | 0.000 | -4954.620  | 2   | 2500   | 0.001 |
|             | 56               | -6706.202  | 2379.270 | 27.587 | -5668.701  | 0   | 2500   | 0.000 | -5831.286  | 1   | 2500   | 0.000 |
|             | 57               | -5134.641  | 1537.327 | 24.757 | -4401.078  | 0   | 2500   | 0.000 | -4547.307  | 10  | 2500   | 0.004 |
|             | 58               | -9334.440  | 4732.193 | 36.515 | -7810.961  | 0   | 2500   | 0.000 | -7984.715  | 0   | 2500   | 0.000 |
|             | 59               | -9445.397  | 4641.883 | 37.083 | -7922.395  | 0   | 2500   | 0.000 | -8095.111  | 0   | 2500   | 0.000 |
|             | 60               | -6626.500  | 2494.654 | 27.211 | -5599.973  | 0   | 2500   | 0.000 | -5757.855  | 0   | 2500   | 0.000 |
|             | 61               | -5845.299  | 1764.236 | 25.763 | -4995.313  | 0   | 2500   | 0.000 | -5160.377  | 1   | 2500   | 0.000 |
|             | 62               | -5523.246  | 1595.715 | 25.386 | -4717.115  | 0   | 2500   | 0.000 | -4865.889  | 3   | 2500   | 0.001 |
|             | 63               | -5675.256  | 1838.672 | 24.951 | -4870.669  | 1   | 2500   | 0.000 | -5027.643  | 7   | 2500   | 0.003 |
|             | 64               | -9489.803  | 4774.498 | 37.137 | -7942.316  | 0   | 2500   | 0.000 | -8123.450  | 0   | 2500   | 0.000 |
|             | 65               | -9407.221  | 4761.815 | 36.574 | -7907.212  | 0   | 2500   | 0.000 | -8083.033  | 0   | 2500   | 0.000 |
|             | 66               | -6985.476  | 2752.011 | 30.110 | -5939.731  | 0   | 2500   | 0.000 | -6103.713  | 0   | 2500   | 0.000 |
|             | 67               | -10104.610 | 4936.201 | 39.207 | -8420.104  | 0   | 2500   | 0.000 | -8599.606  | 0   | 2500   | 0.000 |
|             | 68               | -6567.542  | 2290.837 | 27.211 | -5559.425  | 0   | 2500   | 0.000 | -5720.744  | 0   | 2500   | 0.000 |
|             | 69               | -5121.544  | 1534.252 | 24.764 | -4354.356  | 0   | 2500   | 0.000 | -4500.038  | 2   | 2500   | 0.001 |
|             | 70               | -5949.178  | 2060.767 | 25.389 | -5100.576  | 2   | 2500   | 0.001 | -5248.517  | 2   | 2500   | 0.001 |
|             | 71               | -6626.500  | 2494.654 | 27.211 | -5599.973  | 0   | 2500   | 0.000 | -5757.855  | 0   | 2500   | 0.000 |
|             | 72               | -5523.246  | 1595.715 | 25.386 | -4717.115  | 0   | 2500   | 0.000 | -4865.889  | 3   | 2500   | 0.001 |
|             | 73               | -9247.197  | 4621.883 | 36.276 | -7703.281  | 0   | 2500   | 0.000 | -7893.577  | 0   | 2500   | 0.000 |
|             | 74               | -11083.691 | 5020.937 | 45.221 | -9323.048  | 0   | 2500   | 0.000 | -9562.257  | 0   | 2500   | 0.000 |
|             | 75               | -6944.027  | 2812.030 | 29.596 | -5910.245  | 0   | 2500   | 0.000 | -6070.455  | 2   | 2500   | 0.001 |
|             | 76               | -6022.341  | 1913.220 | 26.032 | -5145.294  | 1   | 2500   | 0.000 | -5308.756  | 6   | 2500   | 0.002 |
|             | 77               | -6586.213  | 2687.463 | 29.319 | -5610.112  | 0   | 2500   | 0.000 | -5772.015  | 0   | 2500   | 0.000 |
|             | 78               | -9386.271  | 4351.925 | 36.964 | -7867.094  | 0   | 2500   | 0.000 | -8059.577  | 0   | 2500   | 0.000 |
|             | 79               | -9419.633  | 4301.192 | 37.069 | -7913.781  | 0   | 2500   | 0.000 | -8098.282  | 0   | 2500   | 0.000 |
|             | 80               | -6100.269  | 2229.219 | 26.390 | -5137.983  | 0   | 2500   | 0.000 | -5285.304  | 0   | 2500   | 0.000 |
|             | 81               | -9348.589  | 4469.750 | 36.494 | -7865.516  | 0   | 2500   | 0.000 | -8053.057  | 0   | 2500   | 0.000 |
|             | 82               | -9655.564  | 4629.806 | 37.668 | -8102.030  | 0   | 2500   | 0.000 | -8283.258  | 0   | 2500   | 0.000 |
|             | 83               | -10490.296 | 5523.774 | 41.822 | -8775.434  | 0   | 2500   | 0.000 | -8976.017  | 0   | 2500   | 0.000 |
|             | 84               | -10612.621 | 5488.532 | 42.363 | -8904.486  | 0   | 2500   | 0.000 | -9101.663  | 0   | 2500   | 0.000 |
|             | 85               | -10172.669 | 4908.238 | 39.281 | -8505.789  | 0   | 2500   | 0.000 | -8693.196  | 0   | 2500   | 0.000 |
|             | 86               | -5995.928  | 2021.110 | 25.875 | -5119.782  | 0   | 2500   | 0.000 | -5276.326  | 2   | 2500   | 0.001 |
|             | 87               | -10132.566 | 5113.868 | 39.275 | -8424.773  | 0   | 2500   | 0.000 | -8624.633  | 0   | 2500   | 0.000 |
|             | 88               | -11099.821 | 4826.346 | 45.776 | -9326.611  | 0   | 2500   | 0.000 | -9563.809  | 0   | 2500   | 0.000 |
|             | 89               | -9287.634  | 4471.478 | 36.371 | -7777.117  | 0   | 2500   | 0.000 | -7958.555  | 0   | 2500   | 0.000 |
|             | 90               | -10132.540 | 5058.480 | 39.257 | -8460.520  | 0   | 2500   | 0.000 | -8657.995  | 0   | 2500   | 0.000 |
|             | 91               | -9495.196  | 4335.470 | 37.516 | -7958.853  | 0   | 2500   | 0.000 | -8141.342  | 0   | 2500   | 0.000 |
|             | 92               | -5287.241  | 1774.502 | 24.277 | -4541.219  | 2   | 2500   | 0.001 | -4682.468  | 16  | 2500   | 0.006 |
|             | 93               | -6836.999  | 2523.502 | 27.768 | -5788.332  | 0   | 2500   | 0.000 | -5952.986  | 1   | 2500   | 0.000 |
|             | 94               | -5949.178  | 2060.767 | 25.389 | -5100.576  | 2   | 2500   | 0.001 | -5248.517  | 2   | 2500   | 0.001 |
|             | 95               | -10429.440 | 5128.668 | 40.007 | -8717.853  | 0   | 2500   | 0.000 | -8915.149  | 0   | 2500   | 0.000 |
|             | 96               | -5923.919  | 1866.686 | 25.773 | -5045.219  | 1   | 2500   | 0.000 | -5202.159  | 3   | 2500   | 0.001 |
|             | 97               | -10561.644 | 4791.703 | 44.366 | -8868.967  | 0   | 2500   | 0.000 | -9096.097  | 0   | 2500   | 0.000 |
|             | 98               | -9445.397  | 4641.883 | 37.083 | -7922.395  | 0   | 2500   | 0.000 | -8095.111  | 0   | 2500   | 0.000 |
|             | 99               | -13417.504 | 2242.219 | 68.096 | -11646.971 | 0   | 2500   | 0.000 | -12039.143 | 0   | 2500   | 0.000 |
|             | 100              | -9247.197  | 4621.883 | 36.276 | -7703.281  | 0   | 2500   | 0.000 | -7893.577  | 0   | 2500   | 0.000 |
|             | <b>Mean</b>      | -7825.827  | 3310.259 | 32.358 | -6602.618  | 0.2 | 2500.0 | 0.000 | -6776.819  | 1.6 | 2500.0 | 0.001 |
|             | <b>Std. Err.</b> | 203.384    | 138.257  | 0.751  | 167.290    | 0.1 | 0.0    | 0.000 | 170.027    | 0.3 | 0.0    | 0.000 |
| Actinopteri | 1                | -87234.771 | 6926.452 | 36.656 | -79472.244 | 0   | 2500   | 0.000 | -79261.624 | 0   | 2500   | 0.000 |
|             | 2                | -96945.013 | 7250.634 | 40.475 | -88651.362 | 0   | 2500   | 0.000 | -88394.659 | 0   | 2500   | 0.000 |
|             | 3                | -89000.705 | 7042.252 | 37.113 | -81348.886 | 0   | 2500   | 0.000 | -81185.857 | 0   | 2500   | 0.000 |



|    |             |          |        |            |   |      |       |            |   |      |       |
|----|-------------|----------|--------|------------|---|------|-------|------------|---|------|-------|
| 4  | -95468.667  | 7730.114 | 39.611 | -86024.425 | 0 | 2500 | 0.000 | -86094.757 | 0 | 2500 | 0.000 |
| 5  | -94558.884  | 6936.833 | 39.931 | -86328.844 | 0 | 2500 | 0.000 | -85939.371 | 0 | 2500 | 0.000 |
| 6  | -91108.805  | 7095.665 | 37.663 | -83137.428 | 0 | 2500 | 0.000 | -83031.806 | 0 | 2500 | 0.000 |
| 7  | -104738.123 | 8433.246 | 42.484 | -95212.983 | 0 | 2500 | 0.000 | -95139.451 | 0 | 2500 | 0.000 |
| 8  | -96826.108  | 7252.229 | 40.696 | -87610.282 | 0 | 2500 | 0.000 | -87543.066 | 0 | 2500 | 0.000 |
| 9  | -94226.034  | 7564.944 | 38.760 | -84750.482 | 0 | 2500 | 0.000 | -84862.733 | 0 | 2500 | 0.000 |
| 10 | -94939.881  | 7484.938 | 39.532 | -86298.007 | 0 | 2500 | 0.000 | -86159.353 | 0 | 2500 | 0.000 |
| 11 | -101559.081 | 8195.945 | 42.600 | -92136.473 | 0 | 2500 | 0.000 | -92178.096 | 0 | 2500 | 0.000 |
| 12 | -88100.240  | 6504.834 | 36.414 | -80342.679 | 0 | 2500 | 0.000 | -80010.984 | 0 | 2500 | 0.000 |
| 13 | -90332.583  | 7619.445 | 37.022 | -81679.304 | 0 | 2500 | 0.000 | -81900.724 | 0 | 2500 | 0.000 |
| 14 | -96625.455  | 7396.455 | 40.111 | -87189.707 | 0 | 2500 | 0.000 | -87198.008 | 0 | 2500 | 0.000 |
| 15 | -97505.020  | 8540.978 | 39.607 | -87651.665 | 0 | 2500 | 0.000 | -87967.162 | 0 | 2500 | 0.000 |
| 16 | -91937.160  | 6837.065 | 38.309 | -83475.207 | 0 | 2500 | 0.000 | -83315.334 | 0 | 2500 | 0.000 |
| 17 | -89847.372  | 7800.562 | 36.583 | -81602.257 | 0 | 2500 | 0.000 | -81717.536 | 0 | 2500 | 0.000 |
| 18 | -93318.151  | 6769.084 | 39.623 | -84728.284 | 0 | 2500 | 0.000 | -84438.555 | 0 | 2500 | 0.000 |
| 19 | -94209.239  | 8072.134 | 38.621 | -85476.788 | 0 | 2500 | 0.000 | -85607.977 | 0 | 2500 | 0.000 |
| 20 | -97020.600  | 7559.921 | 41.132 | -88087.287 | 0 | 2500 | 0.000 | -88026.467 | 0 | 2500 | 0.000 |
| 21 | -94890.352  | 7532.274 | 39.547 | -85709.936 | 0 | 2500 | 0.000 | -85650.660 | 0 | 2500 | 0.000 |
| 22 | -95049.425  | 7822.021 | 39.697 | -85323.834 | 0 | 2500 | 0.000 | -85573.905 | 0 | 2500 | 0.000 |
| 23 | -91548.431  | 8359.444 | 36.572 | -82589.456 | 0 | 2500 | 0.000 | -82994.586 | 0 | 2500 | 0.000 |
| 24 | -90457.903  | 7107.451 | 37.104 | -82094.480 | 0 | 2500 | 0.000 | -82018.504 | 0 | 2500 | 0.000 |
| 25 | -94020.012  | 7394.848 | 39.217 | -86121.478 | 0 | 2500 | 0.000 | -85769.006 | 0 | 2500 | 0.000 |
| 26 | -96661.016  | 8756.991 | 38.781 | -86583.188 | 0 | 2500 | 0.000 | -87041.174 | 0 | 2500 | 0.000 |
| 27 | -94925.052  | 7415.196 | 39.986 | -85990.546 | 0 | 2500 | 0.000 | -86067.628 | 0 | 2500 | 0.000 |
| 28 | -90989.410  | 6710.801 | 39.122 | -82794.522 | 0 | 2500 | 0.000 | -82642.310 | 0 | 2500 | 0.000 |
| 29 | -95817.138  | 7994.672 | 39.000 | -86008.796 | 0 | 2500 | 0.000 | -86339.729 | 0 | 2500 | 0.000 |
| 30 | -95948.842  | 7921.300 | 39.022 | -86268.532 | 0 | 2500 | 0.000 | -86490.990 | 0 | 2500 | 0.000 |
| 31 | -95502.802  | 7144.206 | 40.974 | -87278.538 | 0 | 2500 | 0.000 | -86960.752 | 0 | 2500 | 0.000 |
| 32 | -102302.225 | 8531.770 | 42.015 | -92787.564 | 0 | 2500 | 0.000 | -92838.751 | 0 | 2500 | 0.000 |
| 33 | -96734.493  | 7346.038 | 40.851 | -87716.969 | 0 | 2500 | 0.000 | -87550.340 | 0 | 2500 | 0.000 |
| 34 | -96266.324  | 7742.655 | 40.005 | -87001.019 | 0 | 2500 | 0.000 | -86981.085 | 0 | 2500 | 0.000 |
| 35 | -93912.350  | 8480.251 | 37.258 | -84261.082 | 0 | 2500 | 0.000 | -84745.497 | 0 | 2500 | 0.000 |
| 36 | -91527.201  | 7144.889 | 37.666 | -83537.904 | 0 | 2500 | 0.000 | -83286.025 | 0 | 2500 | 0.000 |
| 37 | -87415.608  | 6276.653 | 36.989 | -79794.736 | 0 | 2500 | 0.000 | -79522.169 | 0 | 2500 | 0.000 |
| 38 | -101834.183 | 8173.774 | 42.360 | -92151.056 | 0 | 2500 | 0.000 | -92299.574 | 0 | 2500 | 0.000 |
| 39 | -98505.964  | 8783.121 | 40.900 | -88634.003 | 0 | 2500 | 0.000 | -88993.599 | 0 | 2500 | 0.000 |
| 40 | -96955.179  | 8089.367 | 39.682 | -87258.427 | 0 | 2500 | 0.000 | -87440.193 | 0 | 2500 | 0.000 |
| 41 | -91528.826  | 8462.883 | 37.595 | -82590.777 | 0 | 2500 | 0.000 | -82971.150 | 0 | 2500 | 0.000 |
| 42 | -97792.724  | 7820.691 | 40.663 | -88052.317 | 0 | 2500 | 0.000 | -88027.289 | 0 | 2500 | 0.000 |
| 43 | -85830.891  | 7462.068 | 35.265 | -77525.784 | 0 | 2500 | 0.000 | -77658.283 | 0 | 2500 | 0.000 |
| 44 | -85569.811  | 6317.216 | 35.986 | -77601.258 | 0 | 2500 | 0.000 | -77462.151 | 0 | 2500 | 0.000 |
| 45 | -93847.373  | 8285.736 | 38.700 | -84063.018 | 0 | 2500 | 0.000 | -84480.308 | 0 | 2500 | 0.000 |
| 46 | -98536.743  | 8787.049 | 40.143 | -88737.077 | 0 | 2500 | 0.000 | -89086.852 | 0 | 2500 | 0.000 |
| 47 | -84971.249  | 6195.216 | 35.732 | -78198.605 | 0 | 2500 | 0.000 | -77663.410 | 0 | 2500 | 0.000 |
| 48 | -98345.829  | 8070.153 | 40.779 | -89180.710 | 0 | 2500 | 0.000 | -89396.512 | 0 | 2500 | 0.000 |
| 49 | -99991.175  | 8394.521 | 40.726 | -90329.044 | 0 | 2500 | 0.000 | -90415.760 | 0 | 2500 | 0.000 |
| 50 | -96085.250  | 7032.976 | 40.937 | -87786.768 | 0 | 2500 | 0.000 | -87485.801 | 0 | 2500 | 0.000 |
| 51 | -86175.115  | 5886.108 | 37.228 | -79101.127 | 0 | 2500 | 0.000 | -78579.190 | 0 | 2500 | 0.000 |
| 52 | -93518.582  | 7410.054 | 39.011 | -84693.175 | 0 | 2500 | 0.000 | -84673.702 | 0 | 2500 | 0.000 |
| 53 | -85800.077  | 6846.875 | 35.373 | -77546.067 | 0 | 2500 | 0.000 | -77742.499 | 0 | 2500 | 0.000 |
| 54 | -100904.075 | 8464.897 | 41.119 | -90459.599 | 0 | 2500 | 0.000 | -90845.681 | 0 | 2500 | 0.000 |
| 55 | -91455.823  | 6713.450 | 38.753 | -83126.197 | 0 | 2500 | 0.000 | -82962.596 | 0 | 2500 | 0.000 |
| 56 | -86053.671  | 6222.873 | 36.083 | -78376.088 | 0 | 2500 | 0.000 | -78022.630 | 0 | 2500 | 0.000 |
| 57 | -102785.559 | 8731.145 | 42.472 | -92430.046 | 0 | 2500 | 0.000 | -92821.752 | 0 | 2500 | 0.000 |
| 58 | -97201.368  | 7953.444 | 39.834 | -87824.685 | 0 | 2500 | 0.000 | -87872.427 | 0 | 2500 | 0.000 |
| 59 | -100714.465 | 8827.581 | 41.289 | -90575.999 | 0 | 2500 | 0.000 | -90897.511 | 0 | 2500 | 0.000 |
| 60 | -95140.215  | 6541.944 | 40.588 | -87638.840 | 0 | 2500 | 0.000 | -86922.561 | 0 | 2500 | 0.000 |
| 61 | -88159.595  | 6532.922 | 37.155 | -80254.853 | 0 | 2500 | 0.000 | -80011.248 | 0 | 2500 | 0.000 |
| 62 | -92522.317  | 6321.977 | 39.286 | -84955.768 | 0 | 2500 | 0.000 | -84315.348 | 0 | 2500 | 0.000 |
| 63 | -91848.260  | 7690.991 | 37.887 | -83255.930 | 0 | 2500 | 0.000 | -83366.400 | 0 | 2500 | 0.000 |
| 64 | -91350.533  | 7210.012 | 37.250 | -83047.671 | 0 | 2500 | 0.000 | -82945.469 | 0 | 2500 | 0.000 |
| 65 | -97998.899  | 7349.171 | 40.458 | -88664.180 | 0 | 2500 | 0.000 | -88547.631 | 0 | 2500 | 0.000 |
| 66 | -88443.176  | 6565.087 | 37.271 | -80766.578 | 0 | 2500 | 0.000 | -80430.141 | 0 | 2500 | 0.000 |
| 67 | -99271.692  | 7871.355 | 41.707 | -89477.673 | 0 | 2500 | 0.000 | -89516.129 | 0 | 2500 | 0.000 |
| 68 | -91742.369  | 7437.159 | 37.450 | -83225.415 | 0 | 2500 | 0.000 | -83230.647 | 0 | 2500 | 0.000 |
| 69 | -99908.307  | 7926.315 | 40.666 | -90185.081 | 0 | 2500 | 0.000 | -90390.858 | 0 | 2500 | 0.000 |

|                 |                  |             |          |        |            |     |        |       |            |     |        |       |
|-----------------|------------------|-------------|----------|--------|------------|-----|--------|-------|------------|-----|--------|-------|
|                 | 70               | -102695.663 | 8685.777 | 42.225 | -92379.309 | 0   | 2500   | 0.000 | -92705.040 | 0   | 2500   | 0.000 |
|                 | 71               | -81982.763  | 6859.856 | 34.007 | -74498.100 | 0   | 2500   | 0.000 | -74541.196 | 0   | 2500   | 0.000 |
|                 | 72               | -89964.499  | 6866.956 | 37.919 | -81197.797 | 0   | 2500   | 0.000 | -81224.854 | 0   | 2500   | 0.000 |
|                 | 73               | -88508.741  | 7109.671 | 36.815 | -80172.670 | 0   | 2500   | 0.000 | -80194.190 | 0   | 2500   | 0.000 |
|                 | 74               | -88446.453  | 6216.991 | 37.015 | -81161.231 | 0   | 2500   | 0.000 | -80620.286 | 0   | 2500   | 0.000 |
|                 | 75               | -96811.795  | 8432.441 | 40.168 | -87281.185 | 0   | 2500   | 0.000 | -87686.438 | 0   | 2500   | 0.000 |
|                 | 76               | -94274.830  | 7114.389 | 39.926 | -85872.277 | 0   | 2500   | 0.000 | -85689.230 | 0   | 2500   | 0.000 |
|                 | 77               | -93468.944  | 7827.622 | 38.706 | -84430.029 | 0   | 2500   | 0.000 | -84693.057 | 0   | 2500   | 0.000 |
|                 | 78               | -91931.633  | 6696.673 | 38.889 | -83930.136 | 0   | 2500   | 0.000 | -83599.519 | 0   | 2500   | 0.000 |
|                 | 79               | -94167.872  | 6983.201 | 39.930 | -85752.536 | 0   | 2500   | 0.000 | -85411.049 | 0   | 2500   | 0.000 |
|                 | 80               | -92881.406  | 6806.835 | 38.873 | -85148.379 | 0   | 2500   | 0.000 | -84718.820 | 0   | 2500   | 0.000 |
|                 | 81               | -99548.187  | 7807.829 | 41.154 | -90267.459 | 0   | 2500   | 0.000 | -90278.283 | 0   | 2500   | 0.000 |
|                 | 82               | -96012.047  | 7783.622 | 39.549 | -86794.815 | 0   | 2500   | 0.000 | -86948.961 | 0   | 2500   | 0.000 |
|                 | 83               | -88954.873  | 6743.023 | 37.748 | -81620.380 | 0   | 2500   | 0.000 | -81386.317 | 0   | 2500   | 0.000 |
|                 | 84               | -86335.744  | 7002.463 | 36.761 | -78714.487 | 0   | 2500   | 0.000 | -78729.660 | 0   | 2500   | 0.000 |
|                 | 85               | -88943.273  | 6899.597 | 37.182 | -80438.831 | 0   | 2500   | 0.000 | -80419.409 | 0   | 2500   | 0.000 |
|                 | 86               | -94986.533  | 8062.904 | 38.720 | -85611.175 | 0   | 2500   | 0.000 | -85849.021 | 0   | 2500   | 0.000 |
|                 | 87               | -96746.763  | 8167.535 | 39.646 | -87734.009 | 0   | 2500   | 0.000 | -87757.064 | 0   | 2500   | 0.000 |
|                 | 88               | -95029.002  | 7782.791 | 39.211 | -86110.724 | 0   | 2500   | 0.000 | -86171.596 | 0   | 2500   | 0.000 |
|                 | 89               | -102575.655 | 8562.606 | 42.423 | -92288.555 | 0   | 2500   | 0.000 | -92562.937 | 0   | 2500   | 0.000 |
|                 | 90               | -92575.336  | 7892.493 | 38.136 | -83984.051 | 0   | 2500   | 0.000 | -84238.370 | 0   | 2500   | 0.000 |
|                 | 91               | -100108.393 | 8422.721 | 40.770 | -89628.697 | 0   | 2500   | 0.000 | -89880.213 | 0   | 2500   | 0.000 |
|                 | 92               | -101974.761 | 8000.170 | 42.001 | -92663.699 | 0   | 2500   | 0.000 | -92434.721 | 0   | 2500   | 0.000 |
|                 | 93               | -99550.177  | 7828.096 | 41.485 | -90086.548 | 0   | 2500   | 0.000 | -89925.905 | 0   | 2500   | 0.000 |
|                 | 94               | -91179.093  | 7433.016 | 37.696 | -82615.452 | 0   | 2500   | 0.000 | -82775.430 | 0   | 2500   | 0.000 |
|                 | 95               | -97760.054  | 7630.185 | 40.753 | -88678.318 | 0   | 2500   | 0.000 | -88576.623 | 0   | 2500   | 0.000 |
|                 | 96               | -85595.202  | 7116.967 | 35.681 | -77822.850 | 0   | 2500   | 0.000 | -77888.518 | 0   | 2500   | 0.000 |
|                 | 97               | -94201.654  | 7649.000 | 38.720 | -85653.827 | 0   | 2500   | 0.000 | -85607.294 | 0   | 2500   | 0.000 |
|                 | 98               | -102331.351 | 8289.355 | 42.054 | -92404.157 | 0   | 2500   | 0.000 | -92515.754 | 0   | 2500   | 0.000 |
|                 | 99               | -93776.176  | 7140.434 | 39.867 | -85481.680 | 0   | 2500   | 0.000 | -85270.861 | 0   | 2500   | 0.000 |
|                 | 100              | -104744.389 | 9096.211 | 42.917 | -94107.992 | 0   | 2500   | 0.000 | -94642.451 | 0   | 2500   | 0.000 |
|                 | <b>Mean</b>      | -94283.230  | 7539.848 | 39.140 | -85453.123 | 0.0 | 2500.0 | 0.000 | -85448.650 | 0.0 | 2500.0 | 0.000 |
|                 | <b>Std. Err.</b> | 496.721     | 72.882   | 0.195  | 427.007    | 0.0 | 0.0    | 0.000 | 435.523    | 0.0 | 0.0    | 0.000 |
| <b>Amphibia</b> | 1                | -2645.070   | 1035.906 | 21.738 | -2201.924  | 3   | 2500   | 0.001 | -2266.757  | 13  | 2500   | 0.005 |
|                 | 2                | -6385.715   | 3329.296 | 50.663 | -5371.405  | 0   | 2500   | 0.000 | -5517.658  | 0   | 2500   | 0.000 |
|                 | 3                | -2259.606   | 1079.996 | 14.269 | -1922.463  | 18  | 2500   | 0.007 | -1962.361  | 41  | 2500   | 0.016 |
|                 | 4                | -3933.084   | 2268.957 | 30.802 | -3287.170  | 0   | 2500   | 0.000 | -3364.407  | 2   | 2500   | 0.001 |
|                 | 5                | -5509.257   | 2963.478 | 44.340 | -4605.306  | 0   | 2500   | 0.000 | -4722.995  | 0   | 2500   | 0.000 |
|                 | 6                | -5136.253   | 3037.225 | 42.690 | -4247.958  | 0   | 2500   | 0.000 | -4355.729  | 0   | 2500   | 0.000 |
|                 | 7                | -2132.198   | 918.284  | 17.318 | -1745.840  | 3   | 2500   | 0.001 | -1796.044  | 10  | 2500   | 0.004 |
|                 | 8                | -3203.624   | 1441.062 | 26.418 | -2613.858  | 0   | 2500   | 0.000 | -2678.432  | 1   | 2500   | 0.000 |
|                 | 9                | -3254.361   | 1814.892 | 28.930 | -2688.284  | 1   | 2500   | 0.000 | -2757.580  | 4   | 2500   | 0.002 |
|                 | 10               | -2602.596   | 971.281  | 24.379 | -2119.104  | 0   | 2500   | 0.000 | -2187.779  | 4   | 2500   | 0.002 |
|                 | 11               | -6044.024   | 3385.447 | 48.311 | -5070.482  | 0   | 2500   | 0.000 | -5198.394  | 0   | 2500   | 0.000 |
|                 | 12               | -3123.907   | 970.456  | 28.017 | -2601.754  | 2   | 2500   | 0.001 | -2692.034  | 6   | 2500   | 0.002 |
|                 | 13               | -6241.263   | 3486.819 | 52.659 | -5154.867  | 0   | 2500   | 0.000 | -5300.278  | 0   | 2500   | 0.000 |
|                 | 14               | -6281.600   | 3415.870 | 50.716 | -5241.904  | 0   | 2500   | 0.000 | -5371.460  | 0   | 2500   | 0.000 |
|                 | 15               | -2887.446   | 1378.340 | 23.973 | -2384.489  | 4   | 2500   | 0.002 | -2449.175  | 4   | 2500   | 0.002 |
|                 | 16               | -3241.101   | 1510.578 | 24.066 | -2681.787  | 4   | 2500   | 0.002 | -2752.035  | 4   | 2500   | 0.002 |
|                 | 17               | -4995.756   | 2868.934 | 44.148 | -4081.785  | 0   | 2500   | 0.000 | -4197.201  | 0   | 2500   | 0.000 |
|                 | 18               | -3027.251   | 1444.442 | 23.534 | -2495.490  | 1   | 2500   | 0.000 | -2563.924  | 9   | 2500   | 0.004 |
|                 | 19               | -1751.218   | 772.696  | 12.982 | -1454.601  | 32  | 2500   | 0.013 | -1502.209  | 51  | 2500   | 0.020 |
|                 | 20               | -5875.905   | 3243.709 | 48.263 | -4854.945  | 0   | 2500   | 0.000 | -4973.620  | 0   | 2500   | 0.000 |
|                 | 21               | -6202.110   | 3185.560 | 48.518 | -5240.056  | 0   | 2500   | 0.000 | -5384.532  | 0   | 2500   | 0.000 |
|                 | 22               | -2179.032   | 1124.760 | 15.486 | -1820.759  | 17  | 2500   | 0.007 | -1868.938  | 27  | 2500   | 0.011 |
|                 | 23               | -2426.567   | 1069.990 | 17.292 | -2017.472  | 5   | 2500   | 0.002 | -2068.283  | 22  | 2500   | 0.009 |
|                 | 24               | -3483.008   | 2055.002 | 27.524 | -2893.308  | 1   | 2500   | 0.000 | -2961.411  | 2   | 2500   | 0.001 |
|                 | 25               | -2599.306   | 1320.442 | 16.360 | -2208.883  | 14  | 2500   | 0.006 | -2257.270  | 38  | 2500   | 0.015 |
|                 | 26               | -4435.101   | 2591.154 | 37.250 | -3631.443  | 0   | 2500   | 0.000 | -3719.216  | 1   | 2500   | 0.000 |
|                 | 27               | -2463.947   | 1101.906 | 19.372 | -2019.841  | 2   | 2500   | 0.001 | -2073.544  | 5   | 2500   | 0.002 |
|                 | 28               | -4598.820   | 2256.963 | 40.729 | -3832.575  | 0   | 2500   | 0.000 | -3945.238  | 1   | 2500   | 0.000 |
|                 | 29               | -4755.192   | 2737.829 | 40.788 | -3920.699  | 0   | 2500   | 0.000 | -4035.554  | 0   | 2500   | 0.000 |
|                 | 30               | -3084.465   | 1108.647 | 29.737 | -2514.018  | 0   | 2500   | 0.000 | -2597.703  | 1   | 2500   | 0.000 |
|                 | 31               | -1497.490   | 693.480  | 11.463 | -1259.902  | 52  | 2500   | 0.021 | -1293.131  | 110 | 2500   | 0.044 |
|                 | 32               | -3912.679   | 2173.159 | 33.448 | -3258.575  | 0   | 2500   | 0.000 | -3358.687  | 2   | 2500   | 0.001 |
|                 | 33               | -3336.264   | 1623.180 | 24.644 | -2776.141  | 2   | 2500   | 0.001 | -2859.479  | 8   | 2500   | 0.003 |

|    |           |          |        |           |    |      |       |           |    |      |       |
|----|-----------|----------|--------|-----------|----|------|-------|-----------|----|------|-------|
| 34 | -3920.092 | 2254.992 | 33.328 | -3221.725 | 0  | 2500 | 0.000 | -3308.788 | 0  | 2500 | 0.000 |
| 35 | -6365.352 | 3321.750 | 52.667 | -5307.970 | 0  | 2500 | 0.000 | -5450.317 | 0  | 2500 | 0.000 |
| 36 | -1976.965 | 953.815  | 14.258 | -1656.180 | 29 | 2500 | 0.012 | -1699.161 | 49 | 2500 | 0.020 |
| 37 | -5630.385 | 3057.924 | 48.479 | -4670.059 | 0  | 2500 | 0.000 | -4797.195 | 1  | 2500 | 0.000 |
| 38 | -6044.024 | 3385.447 | 48.311 | -5070.482 | 0  | 2500 | 0.000 | -5198.394 | 0  | 2500 | 0.000 |
| 39 | -5943.076 | 3137.484 | 47.814 | -4978.476 | 0  | 2500 | 0.000 | -5114.634 | 0  | 2500 | 0.000 |
| 40 | -4389.148 | 2505.697 | 36.421 | -3627.452 | 0  | 2500 | 0.000 | -3717.204 | 0  | 2500 | 0.000 |
| 41 | -3483.008 | 2055.002 | 27.524 | -2893.308 | 1  | 2500 | 0.000 | -2961.411 | 2  | 2500 | 0.001 |
| 42 | -2089.473 | 1017.083 | 14.963 | -1741.077 | 7  | 2500 | 0.003 | -1779.831 | 32 | 2500 | 0.013 |
| 43 | -4088.621 | 2345.317 | 33.262 | -3393.765 | 0  | 2500 | 0.000 | -3492.144 | 0  | 2500 | 0.000 |
| 44 | -5901.989 | 3284.645 | 46.202 | -4931.182 | 0  | 2500 | 0.000 | -5053.483 | 0  | 2500 | 0.000 |
| 45 | -3912.679 | 2173.159 | 33.448 | -3258.575 | 0  | 2500 | 0.000 | -3358.687 | 2  | 2500 | 0.001 |
| 46 | -2675.367 | 995.793  | 27.109 | -2168.316 | 0  | 2500 | 0.000 | -2257.381 | 4  | 2500 | 0.002 |
| 47 | -3963.361 | 2252.663 | 35.430 | -3279.373 | 0  | 2500 | 0.000 | -3368.932 | 2  | 2500 | 0.001 |
| 48 | -2760.265 | 1252.223 | 19.329 | -2297.597 | 3  | 2500 | 0.001 | -2355.214 | 10 | 2500 | 0.004 |
| 49 | -3074.606 | 1359.749 | 28.114 | -2496.018 | 0  | 2500 | 0.000 | -2576.434 | 2  | 2500 | 0.001 |
| 50 | -2309.703 | 1171.090 | 16.324 | -1931.437 | 16 | 2500 | 0.006 | -1983.057 | 17 | 2500 | 0.007 |
| 51 | -3203.624 | 1441.062 | 26.418 | -2613.858 | 0  | 2500 | 0.000 | -2678.432 | 1  | 2500 | 0.000 |
| 52 | -5486.262 | 2932.543 | 46.409 | -4518.571 | 0  | 2500 | 0.000 | -4645.909 | 0  | 2500 | 0.000 |
| 53 | -3512.979 | 1610.208 | 27.518 | -2889.197 | 0  | 2500 | 0.000 | -2967.245 | 1  | 2500 | 0.000 |
| 54 | -6281.600 | 3415.870 | 50.716 | -5241.904 | 0  | 2500 | 0.000 | -5371.460 | 0  | 2500 | 0.000 |
| 55 | -3912.679 | 2173.159 | 33.448 | -3258.575 | 0  | 2500 | 0.000 | -3358.687 | 2  | 2500 | 0.001 |
| 56 | -2599.306 | 1320.442 | 16.360 | -2208.883 | 14 | 2500 | 0.006 | -2257.270 | 38 | 2500 | 0.015 |
| 57 | -4995.756 | 2868.934 | 44.148 | -4081.785 | 0  | 2500 | 0.000 | -4197.201 | 0  | 2500 | 0.000 |
| 58 | -1228.668 | 580.096  | 11.478 | -1010.975 | 40 | 2500 | 0.016 | -1042.398 | 67 | 2500 | 0.027 |
| 59 | -4460.087 | 2629.048 | 35.229 | -3708.366 | 1  | 2500 | 0.000 | -3798.866 | 1  | 2500 | 0.000 |
| 60 | -6726.562 | 3587.387 | 53.556 | -5631.941 | 0  | 2500 | 0.000 | -5781.105 | 0  | 2500 | 0.000 |
| 61 | -5076.764 | 2596.514 | 42.516 | -4265.129 | 0  | 2500 | 0.000 | -4401.772 | 2  | 2500 | 0.001 |
| 62 | -1976.965 | 953.815  | 14.258 | -1656.180 | 29 | 2500 | 0.012 | -1699.161 | 49 | 2500 | 0.020 |
| 63 | -1751.218 | 772.696  | 12.982 | -1454.601 | 32 | 2500 | 0.013 | -1502.209 | 51 | 2500 | 0.020 |
| 64 | -3336.264 | 1623.180 | 24.644 | -2776.141 | 2  | 2500 | 0.001 | -2859.479 | 8  | 2500 | 0.003 |
| 65 | -2645.070 | 1035.906 | 21.738 | -2201.924 | 3  | 2500 | 0.001 | -2266.757 | 13 | 2500 | 0.005 |
| 66 | -4995.756 | 2868.934 | 44.148 | -4081.785 | 0  | 2500 | 0.000 | -4197.201 | 0  | 2500 | 0.000 |
| 67 | -3535.301 | 1631.494 | 28.521 | -2908.554 | 3  | 2500 | 0.001 | -2988.444 | 0  | 2500 | 0.000 |
| 68 | -4795.207 | 2782.947 | 41.691 | -3928.555 | 0  | 2500 | 0.000 | -4036.326 | 0  | 2500 | 0.000 |
| 69 | -6480.011 | 3664.607 | 52.474 | -5353.647 | 0  | 2500 | 0.000 | -5480.474 | 0  | 2500 | 0.000 |
| 70 | -5845.240 | 2899.504 | 48.819 | -4918.281 | 0  | 2500 | 0.000 | -5052.921 | 0  | 2500 | 0.000 |
| 71 | -6225.490 | 3502.433 | 49.200 | -5180.214 | 0  | 2500 | 0.000 | -5304.748 | 0  | 2500 | 0.000 |
| 72 | -2760.265 | 1252.223 | 19.329 | -2297.597 | 3  | 2500 | 0.001 | -2355.214 | 10 | 2500 | 0.004 |
| 73 | -1475.130 | 656.712  | 13.002 | -1204.364 | 19 | 2500 | 0.008 | -1238.135 | 38 | 2500 | 0.015 |
| 74 | -5486.262 | 2932.543 | 46.409 | -4518.571 | 0  | 2500 | 0.000 | -4645.909 | 0  | 2500 | 0.000 |
| 75 | -4598.820 | 2256.963 | 40.729 | -3832.575 | 0  | 2500 | 0.000 | -3945.238 | 1  | 2500 | 0.000 |
| 76 | -2189.178 | 845.085  | 16.748 | -1831.112 | 12 | 2500 | 0.005 | -1883.278 | 30 | 2500 | 0.012 |
| 77 | -4063.144 | 2310.805 | 35.375 | -3312.383 | 0  | 2500 | 0.000 | -3405.135 | 0  | 2500 | 0.000 |
| 78 | -1475.130 | 656.712  | 13.002 | -1204.364 | 19 | 2500 | 0.008 | -1238.135 | 38 | 2500 | 0.015 |
| 79 | -3312.734 | 986.292  | 32.410 | -2727.538 | 0  | 2500 | 0.000 | -2825.241 | 3  | 2500 | 0.001 |
| 80 | -6044.024 | 3385.447 | 48.311 | -5070.482 | 0  | 2500 | 0.000 | -5198.394 | 0  | 2500 | 0.000 |
| 81 | -4995.756 | 2868.934 | 44.148 | -4081.785 | 0  | 2500 | 0.000 | -4197.201 | 0  | 2500 | 0.000 |
| 82 | -2488.513 | 1092.919 | 22.564 | -2011.058 | 0  | 2500 | 0.000 | -2078.640 | 4  | 2500 | 0.002 |
| 83 | -5901.989 | 3284.645 | 46.202 | -4931.182 | 0  | 2500 | 0.000 | -5053.483 | 0  | 2500 | 0.000 |
| 84 | -1475.130 | 656.712  | 13.002 | -1204.364 | 19 | 2500 | 0.008 | -1238.135 | 38 | 2500 | 0.015 |
| 85 | -2259.606 | 1079.996 | 14.269 | -1922.463 | 18 | 2500 | 0.007 | -1962.361 | 41 | 2500 | 0.016 |
| 86 | -5133.553 | 2692.403 | 44.446 | -4288.486 | 0  | 2500 | 0.000 | -4419.383 | 2  | 2500 | 0.001 |
| 87 | -1556.914 | 825.089  | 13.374 | -1280.466 | 22 | 2500 | 0.009 | -1317.291 | 34 | 2500 | 0.014 |
| 88 | -1228.668 | 580.096  | 11.478 | -1010.975 | 40 | 2500 | 0.016 | -1042.398 | 67 | 2500 | 0.027 |
| 89 | -3027.251 | 1444.442 | 23.534 | -2495.490 | 1  | 2500 | 0.000 | -2563.924 | 9  | 2500 | 0.004 |
| 90 | -6675.930 | 3716.390 | 52.601 | -5577.127 | 0  | 2500 | 0.000 | -5722.794 | 0  | 2500 | 0.000 |
| 91 | -4732.708 | 2337.096 | 42.877 | -3951.244 | 0  | 2500 | 0.000 | -4082.401 | 1  | 2500 | 0.000 |
| 92 | -6202.110 | 3185.560 | 48.518 | -5240.056 | 0  | 2500 | 0.000 | -5384.532 | 0  | 2500 | 0.000 |
| 93 | -2815.336 | 1593.379 | 25.659 | -2309.138 | 2  | 2500 | 0.001 | -2368.500 | 2  | 2500 | 0.001 |
| 94 | -4088.621 | 2345.317 | 33.262 | -3393.765 | 0  | 2500 | 0.000 | -3492.144 | 0  | 2500 | 0.000 |
| 95 | -3241.101 | 1510.578 | 24.066 | -2681.787 | 4  | 2500 | 0.002 | -2752.035 | 4  | 2500 | 0.002 |
| 96 | -5438.919 | 2554.577 | 47.266 | -4573.335 | 0  | 2500 | 0.000 | -4713.969 | 0  | 2500 | 0.000 |
| 97 | -5943.076 | 3137.484 | 47.814 | -4978.476 | 0  | 2500 | 0.000 | -5114.634 | 0  | 2500 | 0.000 |
| 98 | -2789.421 | 1253.604 | 23.603 | -2300.454 | 2  | 2500 | 0.001 | -2365.954 | 9  | 2500 | 0.004 |
| 99 | -6675.930 | 3716.390 | 52.601 | -5577.127 | 0  | 2500 | 0.000 | -5722.794 | 0  | 2500 | 0.000 |

|                  |     |            |          |        |            |     |        |       |            |      |        |       |
|------------------|-----|------------|----------|--------|------------|-----|--------|-------|------------|------|--------|-------|
|                  | 100 | -3350.064  | 1378.281 | 29.687 | -2711.122  | 0   | 2500   | 0.000 | -2795.520  | 1    | 2500   | 0.000 |
| <b>Mean</b>      |     | -3945.294  | 2043.310 | 32.364 | -3275.500  | 5.0 | 2500.0 | 0.002 | -3365.162  | 10.5 | 2500.0 | 0.004 |
| <b>Std. Err.</b> |     | 158.521    | 96.289   | 1.331  | 132.784    | 1.0 | 0.0    | 0.000 | 136.210    | 1.9  | 0.0    | 0.001 |
| Sauropsida       | 1   | -12962.411 | 5322.905 | 20.348 | -11011.572 | 0   | 2500   | 0.000 | -11214.688 | 0    | 2500   | 0.000 |
|                  | 2   | -11864.336 | 4882.154 | 19.109 | -10017.774 | 0   | 2500   | 0.000 | -10211.832 | 0    | 2500   | 0.000 |
|                  | 3   | -10700.774 | 4167.598 | 16.311 | -9151.874  | 0   | 2500   | 0.000 | -9343.310  | 2    | 2500   | 0.001 |
|                  | 4   | -7754.670  | 3316.288 | 11.695 | -6615.466  | 0   | 2500   | 0.000 | -6742.615  | 3    | 2500   | 0.001 |
|                  | 5   | -13267.737 | 5755.744 | 20.456 | -11279.198 | 0   | 2500   | 0.000 | -11475.520 | 0    | 2500   | 0.000 |
|                  | 6   | -12494.283 | 4779.873 | 18.569 | -10658.792 | 0   | 2500   | 0.000 | -10870.582 | 0    | 2500   | 0.000 |
|                  | 7   | -9702.313  | 3593.629 | 14.708 | -8158.402  | 0   | 2500   | 0.000 | -8347.470  | 0    | 2500   | 0.000 |
|                  | 8   | -9589.799  | 3980.841 | 14.218 | -8231.018  | 0   | 2500   | 0.000 | -8384.598  | 0    | 2500   | 0.000 |
|                  | 9   | -13480.855 | 4611.074 | 21.198 | -11386.516 | 0   | 2500   | 0.000 | -11634.027 | 0    | 2500   | 0.000 |
|                  | 10  | -11260.258 | 3709.564 | 17.416 | -9545.252  | 0   | 2500   | 0.000 | -9742.683  | 0    | 2500   | 0.000 |
|                  | 11  | -11445.652 | 4914.197 | 18.158 | -9601.347  | 0   | 2500   | 0.000 | -9785.580  | 0    | 2500   | 0.000 |
|                  | 12  | -14202.234 | 6093.438 | 21.683 | -11993.653 | 0   | 2500   | 0.000 | -12216.376 | 0    | 2500   | 0.000 |
|                  | 13  | -12041.252 | 4933.263 | 18.603 | -10292.248 | 0   | 2500   | 0.000 | -10501.315 | 0    | 2500   | 0.000 |
|                  | 14  | -9946.589  | 4046.542 | 15.473 | -8368.294  | 0   | 2500   | 0.000 | -8554.058  | 0    | 2500   | 0.000 |
|                  | 15  | -13310.733 | 5731.423 | 20.283 | -11390.773 | 0   | 2500   | 0.000 | -11592.152 | 0    | 2500   | 0.000 |
|                  | 16  | -15818.685 | 6413.524 | 24.492 | -13536.403 | 0   | 2500   | 0.000 | -13811.543 | 0    | 2500   | 0.000 |
|                  | 17  | -11443.259 | 3473.192 | 18.491 | -9833.818  | 0   | 2500   | 0.000 | -10068.193 | 0    | 2500   | 0.000 |
|                  | 18  | -10448.532 | 4258.029 | 16.008 | -8850.837  | 0   | 2500   | 0.000 | -9030.360  | 0    | 2500   | 0.000 |
|                  | 19  | -7330.698  | 3633.896 | 10.427 | -6090.666  | 0   | 2500   | 0.000 | -6197.816  | 0    | 2500   | 0.000 |
|                  | 20  | -13387.672 | 5534.122 | 20.116 | -11321.205 | 0   | 2500   | 0.000 | -11539.490 | 0    | 2500   | 0.000 |
|                  | 21  | -15507.386 | 5311.792 | 25.017 | -13251.764 | 0   | 2500   | 0.000 | -13549.232 | 0    | 2500   | 0.000 |
|                  | 22  | -11449.186 | 5513.147 | 16.325 | -9817.389  | 0   | 2500   | 0.000 | -10000.334 | 0    | 2500   | 0.000 |
|                  | 23  | -10900.917 | 5729.525 | 16.394 | -9160.936  | 0   | 2500   | 0.000 | -9336.248  | 0    | 2500   | 0.000 |
|                  | 24  | -13285.694 | 4399.631 | 22.647 | -11256.139 | 0   | 2500   | 0.000 | -11525.141 | 0    | 2500   | 0.000 |
|                  | 25  | -14304.901 | 6282.607 | 21.409 | -12189.135 | 0   | 2500   | 0.000 | -12433.062 | 0    | 2500   | 0.000 |
|                  | 26  | -15798.017 | 6425.495 | 25.624 | -13450.872 | 0   | 2500   | 0.000 | -13730.531 | 0    | 2500   | 0.000 |
|                  | 27  | -10754.118 | 4515.725 | 16.668 | -9116.011  | 0   | 2500   | 0.000 | -9303.838  | 1    | 2500   | 0.000 |
|                  | 28  | -8396.419  | 3559.386 | 11.320 | -7040.726  | 0   | 2500   | 0.000 | -7170.141  | 1    | 2500   | 0.000 |
|                  | 29  | -11556.003 | 4162.959 | 19.280 | -9777.737  | 0   | 2500   | 0.000 | -10000.508 | 0    | 2500   | 0.000 |
|                  | 30  | -10704.013 | 4132.338 | 16.776 | -9151.244  | 0   | 2500   | 0.000 | -9335.506  | 0    | 2500   | 0.000 |
|                  | 31  | -14584.021 | 6129.952 | 22.536 | -12396.660 | 0   | 2500   | 0.000 | -12675.441 | 0    | 2500   | 0.000 |
|                  | 32  | -12271.081 | 4779.310 | 20.787 | -10406.140 | 0   | 2500   | 0.000 | -10635.830 | 0    | 2500   | 0.000 |
|                  | 33  | -15067.993 | 6905.779 | 24.300 | -12722.300 | 0   | 2500   | 0.000 | -12946.010 | 0    | 2500   | 0.000 |
|                  | 34  | -10543.041 | 4499.415 | 16.854 | -8962.803  | 0   | 2500   | 0.000 | -9135.355  | 0    | 2500   | 0.000 |
|                  | 35  | -12481.157 | 4776.980 | 19.929 | -10651.169 | 0   | 2500   | 0.000 | -10871.856 | 0    | 2500   | 0.000 |
|                  | 36  | -10893.856 | 3231.428 | 18.528 | -9347.276  | 0   | 2500   | 0.000 | -9568.628  | 0    | 2500   | 0.000 |
|                  | 37  | -10263.613 | 4276.577 | 15.546 | -8842.865  | 0   | 2500   | 0.000 | -9006.186  | 0    | 2500   | 0.000 |
|                  | 38  | -12446.403 | 5247.032 | 18.220 | -10575.953 | 0   | 2500   | 0.000 | -10779.638 | 0    | 2500   | 0.000 |
|                  | 39  | -10792.560 | 4264.887 | 16.826 | -9225.594  | 0   | 2500   | 0.000 | -9414.581  | 0    | 2500   | 0.000 |
|                  | 40  | -13725.913 | 6919.464 | 21.021 | -11666.380 | 0   | 2500   | 0.000 | -11877.254 | 0    | 2500   | 0.000 |
|                  | 41  | -12303.849 | 5853.950 | 19.740 | -10433.901 | 0   | 2500   | 0.000 | -10615.613 | 0    | 2500   | 0.000 |
|                  | 42  | -13303.076 | 4050.732 | 21.448 | -11379.848 | 0   | 2500   | 0.000 | -11616.679 | 0    | 2500   | 0.000 |
|                  | 43  | -12670.238 | 5104.195 | 19.083 | -10746.064 | 0   | 2500   | 0.000 | -10938.903 | 0    | 2500   | 0.000 |
|                  | 44  | -9880.695  | 4178.609 | 15.443 | -8431.228  | 0   | 2500   | 0.000 | -8594.387  | 1    | 2500   | 0.000 |
|                  | 45  | -12044.747 | 5010.342 | 18.448 | -10125.410 | 0   | 2500   | 0.000 | -10338.318 | 0    | 2500   | 0.000 |
|                  | 46  | -9702.775  | 4097.174 | 14.773 | -8225.667  | 1   | 2500   | 0.000 | -8406.985  | 0    | 2500   | 0.000 |
|                  | 47  | -11408.593 | 3950.772 | 18.253 | -9726.394  | 0   | 2500   | 0.000 | -9937.882  | 0    | 2500   | 0.000 |
|                  | 48  | -10023.995 | 3152.637 | 16.828 | -8476.212  | 0   | 2500   | 0.000 | -8675.881  | 0    | 2500   | 0.000 |
|                  | 49  | -11786.256 | 4825.527 | 18.485 | -9992.704  | 0   | 2500   | 0.000 | -10187.324 | 0    | 2500   | 0.000 |
|                  | 50  | -9185.002  | 3743.249 | 13.693 | -7892.348  | 0   | 2500   | 0.000 | -8044.358  | 1    | 2500   | 0.000 |
|                  | 51  | -11659.076 | 4629.814 | 19.517 | -9894.708  | 0   | 2500   | 0.000 | -10113.357 | 0    | 2500   | 0.000 |
|                  | 52  | -12894.502 | 3979.895 | 21.228 | -11141.701 | 0   | 2500   | 0.000 | -11379.872 | 0    | 2500   | 0.000 |
|                  | 53  | -8994.641  | 4045.910 | 12.902 | -7591.514  | 0   | 2500   | 0.000 | -7711.456  | 0    | 2500   | 0.000 |
|                  | 54  | -12379.287 | 5224.629 | 17.623 | -10513.052 | 0   | 2500   | 0.000 | -10684.694 | 0    | 2500   | 0.000 |
|                  | 55  | -12758.129 | 3717.275 | 23.270 | -10875.490 | 0   | 2500   | 0.000 | -11141.375 | 0    | 2500   | 0.000 |
|                  | 56  | -13042.051 | 5708.491 | 19.983 | -11084.114 | 0   | 2500   | 0.000 | -11302.428 | 0    | 2500   | 0.000 |
|                  | 57  | -7556.419  | 3258.083 | 10.648 | -6450.020  | 1   | 2500   | 0.000 | -6561.395  | 2    | 2500   | 0.001 |
|                  | 58  | -11845.441 | 5638.124 | 17.793 | -10024.072 | 0   | 2500   | 0.000 | -10220.625 | 0    | 2500   | 0.000 |
|                  | 59  | -10628.496 | 4420.279 | 16.412 | -8987.085  | 0   | 2500   | 0.000 | -9168.872  | 0    | 2500   | 0.000 |
|                  | 60  | -7706.912  | 3281.767 | 10.794 | -6605.132  | 1   | 2500   | 0.000 | -6746.969  | 3    | 2500   | 0.001 |
|                  | 61  | -12977.327 | 5578.749 | 19.938 | -11243.900 | 0   | 2500   | 0.000 | -11459.930 | 0    | 2500   | 0.000 |
|                  | 62  | -14141.482 | 6227.766 | 22.316 | -12062.048 | 0   | 2500   | 0.000 | -12291.710 | 0    | 2500   | 0.000 |
|                  | 63  | -15850.988 | 6390.527 | 24.540 | -13545.695 | 0   | 2500   | 0.000 | -13809.856 | 0    | 2500   | 0.000 |

|      |                  |            |          |        |            |     |        |       |            |     |        |       |
|------|------------------|------------|----------|--------|------------|-----|--------|-------|------------|-----|--------|-------|
|      | 64               | -11299.944 | 5694.572 | 17.566 | -9441.170  | 0   | 2500   | 0.000 | -9611.271  | 0   | 2500   | 0.000 |
|      | 65               | -12085.845 | 5147.787 | 20.445 | -10261.681 | 0   | 2500   | 0.000 | -10471.768 | 0   | 2500   | 0.000 |
|      | 66               | -14888.275 | 5075.286 | 25.060 | -12626.209 | 0   | 2500   | 0.000 | -12943.802 | 0   | 2500   | 0.000 |
|      | 67               | -9851.993  | 2877.152 | 16.196 | -8434.684  | 0   | 2500   | 0.000 | -8608.743  | 0   | 2500   | 0.000 |
|      | 68               | -13233.946 | 5713.601 | 20.054 | -11391.649 | 0   | 2500   | 0.000 | -11621.291 | 0   | 2500   | 0.000 |
|      | 69               | -11818.786 | 5719.800 | 19.014 | -9939.560  | 0   | 2500   | 0.000 | -10112.616 | 0   | 2500   | 0.000 |
|      | 70               | -10725.417 | 4903.524 | 17.762 | -9081.384  | 0   | 2500   | 0.000 | -9248.587  | 0   | 2500   | 0.000 |
|      | 71               | -7952.232  | 3323.997 | 12.419 | -6713.010  | 0   | 2500   | 0.000 | -6841.015  | 0   | 2500   | 0.000 |
|      | 72               | -11520.249 | 3943.477 | 19.579 | -9709.184  | 0   | 2500   | 0.000 | -9939.107  | 0   | 2500   | 0.000 |
|      | 73               | -12438.779 | 5357.882 | 18.418 | -10540.678 | 0   | 2500   | 0.000 | -10755.974 | 0   | 2500   | 0.000 |
|      | 74               | -10989.040 | 4871.044 | 16.661 | -9297.789  | 0   | 2500   | 0.000 | -9489.597  | 0   | 2500   | 0.000 |
|      | 75               | -8465.206  | 3792.726 | 11.703 | -7099.861  | 0   | 2500   | 0.000 | -7226.586  | 0   | 2500   | 0.000 |
|      | 76               | -13957.925 | 4892.425 | 22.688 | -11945.115 | 0   | 2500   | 0.000 | -12210.230 | 0   | 2500   | 0.000 |
|      | 77               | -13609.852 | 5246.993 | 22.271 | -11600.326 | 0   | 2500   | 0.000 | -11868.194 | 0   | 2500   | 0.000 |
|      | 78               | -11447.400 | 4980.767 | 18.166 | -9703.712  | 0   | 2500   | 0.000 | -9904.889  | 0   | 2500   | 0.000 |
|      | 79               | -15610.638 | 6565.767 | 24.185 | -13324.556 | 0   | 2500   | 0.000 | -13577.560 | 0   | 2500   | 0.000 |
|      | 80               | -11704.533 | 4830.575 | 19.014 | -9796.409  | 0   | 2500   | 0.000 | -9986.984  | 0   | 2500   | 0.000 |
|      | 81               | -9683.063  | 4096.450 | 14.422 | -8291.724  | 0   | 2500   | 0.000 | -8439.942  | 0   | 2500   | 0.000 |
|      | 82               | -10311.800 | 3313.429 | 17.856 | -8711.407  | 0   | 2500   | 0.000 | -8922.485  | 0   | 2500   | 0.000 |
|      | 83               | -9491.568  | 3206.014 | 14.634 | -8026.106  | 0   | 2500   | 0.000 | -8197.367  | 0   | 2500   | 0.000 |
|      | 84               | -12158.914 | 4739.073 | 18.126 | -10339.417 | 0   | 2500   | 0.000 | -10557.534 | 0   | 2500   | 0.000 |
|      | 85               | -9251.650  | 3356.257 | 13.931 | -7846.929  | 0   | 2500   | 0.000 | -8013.448  | 0   | 2500   | 0.000 |
|      | 86               | -9599.346  | 3809.063 | 15.451 | -8165.734  | 0   | 2500   | 0.000 | -8345.092  | 0   | 2500   | 0.000 |
|      | 87               | -15417.485 | 6133.918 | 24.383 | -13086.487 | 0   | 2500   | 0.000 | -13354.235 | 0   | 2500   | 0.000 |
|      | 88               | -15016.104 | 5863.509 | 23.243 | -12764.054 | 0   | 2500   | 0.000 | -13027.353 | 0   | 2500   | 0.000 |
|      | 89               | -10670.490 | 2934.367 | 17.378 | -9088.666  | 0   | 2500   | 0.000 | -9315.468  | 0   | 2500   | 0.000 |
|      | 90               | -10033.470 | 4088.096 | 15.686 | -8592.967  | 0   | 2500   | 0.000 | -8765.172  | 0   | 2500   | 0.000 |
|      | 91               | -11013.263 | 5085.313 | 16.497 | -9311.542  | 0   | 2500   | 0.000 | -9509.453  | 0   | 2500   | 0.000 |
|      | 92               | -11230.993 | 5643.154 | 16.675 | -9543.978  | 0   | 2500   | 0.000 | -9709.720  | 0   | 2500   | 0.000 |
|      | 93               | -10620.435 | 4055.901 | 17.136 | -8897.832  | 0   | 2500   | 0.000 | -9096.529  | 0   | 2500   | 0.000 |
|      | 94               | -9570.535  | 3151.612 | 14.710 | -8242.830  | 0   | 2500   | 0.000 | -8421.340  | 1   | 2500   | 0.000 |
|      | 95               | -14459.037 | 6252.176 | 22.676 | -12164.855 | 0   | 2500   | 0.000 | -12415.909 | 0   | 2500   | 0.000 |
|      | 96               | -12368.791 | 5097.583 | 18.629 | -10409.122 | 0   | 2500   | 0.000 | -10615.182 | 0   | 2500   | 0.000 |
|      | 97               | -10383.575 | 3748.741 | 16.485 | -8837.909  | 0   | 2500   | 0.000 | -9047.896  | 0   | 2500   | 0.000 |
|      | 98               | -15569.234 | 6669.494 | 25.900 | -13206.582 | 0   | 2500   | 0.000 | -13466.085 | 0   | 2500   | 0.000 |
|      | 99               | -9870.503  | 4239.952 | 15.333 | -8256.638  | 0   | 2500   | 0.000 | -8428.277  | 0   | 2500   | 0.000 |
|      | 100              | -12607.208 | 5734.482 | 19.420 | -10790.874 | 0   | 2500   | 0.000 | -10996.587 | 0   | 2500   | 0.000 |
|      | <b>Mean</b>      | -11738.505 | 4744.392 | 18.367 | -9972.751  | 0.0 | 2500.0 | 0.000 | -10175.717 | 0.2 | 2500.0 | 0.000 |
|      | <b>Std. Err.</b> | 204.483    | 101.648  | 0.355  | 175.096    | 0.0 | 0.0    | 0.000 | 178.742    | 0.1 | 0.0    | 0.000 |
| Aves | 1                | -34865.996 | 8015.504 | 15.825 | -29572.531 | 0   | 2500   | 0.000 | -30152.317 | 0   | 2500   | 0.000 |
|      | 2                | -37583.435 | 8509.847 | 17.454 | -31771.865 | 0   | 2500   | 0.000 | -32410.100 | 0   | 2500   | 0.000 |
|      | 3                | -33220.121 | 8117.768 | 15.271 | -28146.511 | 0   | 2500   | 0.000 | -28740.639 | 0   | 2500   | 0.000 |
|      | 4                | -31764.846 | 8109.649 | 14.324 | -26936.832 | 0   | 2500   | 0.000 | -27492.176 | 0   | 2500   | 0.000 |
|      | 5                | -36324.108 | 9751.346 | 16.630 | -30853.181 | 0   | 2500   | 0.000 | -31452.473 | 0   | 2500   | 0.000 |
|      | 6                | -37826.599 | 9085.395 | 17.123 | -32052.415 | 0   | 2500   | 0.000 | -32691.406 | 0   | 2500   | 0.000 |
|      | 7                | -34513.815 | 7975.494 | 15.724 | -29291.385 | 0   | 2500   | 0.000 | -29887.386 | 0   | 2500   | 0.000 |
|      | 8                | -37040.481 | 8102.449 | 16.992 | -31232.766 | 0   | 2500   | 0.000 | -31894.390 | 0   | 2500   | 0.000 |
|      | 9                | -37117.838 | 8289.144 | 17.007 | -31466.113 | 0   | 2500   | 0.000 | -32065.417 | 0   | 2500   | 0.000 |
|      | 10               | -36120.476 | 7573.456 | 16.534 | -30596.292 | 0   | 2500   | 0.000 | -31228.426 | 0   | 2500   | 0.000 |
|      | 11               | -38298.111 | 8531.213 | 17.657 | -32550.817 | 0   | 2500   | 0.000 | -33186.824 | 0   | 2500   | 0.000 |
|      | 12               | -34411.257 | 7751.897 | 15.645 | -29215.523 | 0   | 2500   | 0.000 | -29771.520 | 0   | 2500   | 0.000 |
|      | 13               | -39624.870 | 9217.196 | 18.106 | -33545.771 | 0   | 2500   | 0.000 | -34248.233 | 0   | 2500   | 0.000 |
|      | 14               | -38552.671 | 8651.328 | 17.491 | -32705.257 | 0   | 2500   | 0.000 | -33341.666 | 0   | 2500   | 0.000 |
|      | 15               | -36023.043 | 9482.623 | 16.387 | -30407.548 | 0   | 2500   | 0.000 | -30996.607 | 0   | 2500   | 0.000 |
|      | 16               | -31161.313 | 7039.179 | 14.174 | -26284.350 | 0   | 2500   | 0.000 | -26850.815 | 0   | 2500   | 0.000 |
|      | 17               | -34483.088 | 8761.407 | 15.880 | -29213.568 | 0   | 2500   | 0.000 | -29796.827 | 0   | 2500   | 0.000 |
|      | 18               | -36800.009 | 8128.337 | 16.867 | -31186.672 | 0   | 2500   | 0.000 | -31814.579 | 0   | 2500   | 0.000 |
|      | 19               | -39086.648 | 8477.969 | 17.803 | -33130.456 | 0   | 2500   | 0.000 | -33773.115 | 0   | 2500   | 0.000 |
|      | 20               | -35633.431 | 8632.761 | 16.154 | -30137.248 | 0   | 2500   | 0.000 | -30736.307 | 0   | 2500   | 0.000 |
|      | 21               | -35644.608 | 8351.535 | 16.330 | -30112.299 | 0   | 2500   | 0.000 | -30738.633 | 0   | 2500   | 0.000 |
|      | 22               | -38802.867 | 8977.020 | 17.616 | -32755.590 | 0   | 2500   | 0.000 | -33403.129 | 0   | 2500   | 0.000 |
|      | 23               | -36956.934 | 8500.845 | 16.737 | -31316.611 | 0   | 2500   | 0.000 | -31935.110 | 0   | 2500   | 0.000 |
|      | 24               | -40302.500 | 9109.506 | 18.356 | -34170.503 | 0   | 2500   | 0.000 | -34845.178 | 0   | 2500   | 0.000 |
|      | 25               | -35881.709 | 7905.138 | 16.669 | -30368.142 | 0   | 2500   | 0.000 | -30953.346 | 0   | 2500   | 0.000 |
|      | 26               | -33890.990 | 7568.130 | 15.418 | -28914.162 | 0   | 2500   | 0.000 | -29487.174 | 0   | 2500   | 0.000 |
|      | 27               | -37097.770 | 9187.429 | 16.979 | -31407.299 | 0   | 2500   | 0.000 | -32006.988 | 0   | 2500   | 0.000 |

|    |            |          |        |            |   |      |       |            |   |      |       |
|----|------------|----------|--------|------------|---|------|-------|------------|---|------|-------|
| 28 | -31782.716 | 7858.864 | 14.584 | -26956.455 | 0 | 2500 | 0.000 | -27519.085 | 0 | 2500 | 0.000 |
| 29 | -33638.510 | 8653.063 | 15.425 | -28345.065 | 0 | 2500 | 0.000 | -28920.738 | 0 | 2500 | 0.000 |
| 30 | -36842.567 | 9001.594 | 16.930 | -31256.090 | 0 | 2500 | 0.000 | -31843.457 | 0 | 2500 | 0.000 |
| 31 | -32803.348 | 8023.974 | 14.806 | -27918.735 | 0 | 2500 | 0.000 | -28457.596 | 0 | 2500 | 0.000 |
| 32 | -32391.450 | 8654.215 | 14.867 | -27351.431 | 0 | 2500 | 0.000 | -27927.712 | 0 | 2500 | 0.000 |
| 33 | -35768.420 | 8506.481 | 16.531 | -30258.202 | 0 | 2500 | 0.000 | -30871.549 | 0 | 2500 | 0.000 |
| 34 | -38948.474 | 9239.277 | 17.902 | -33022.558 | 0 | 2500 | 0.000 | -33682.819 | 0 | 2500 | 0.000 |
| 35 | -38988.385 | 8892.276 | 17.993 | -33025.732 | 0 | 2500 | 0.000 | -33692.478 | 0 | 2500 | 0.000 |
| 36 | -33154.385 | 7755.331 | 14.994 | -28073.999 | 0 | 2500 | 0.000 | -28641.289 | 0 | 2500 | 0.000 |
| 37 | -33293.385 | 7393.908 | 15.250 | -28242.163 | 0 | 2500 | 0.000 | -28814.416 | 0 | 2500 | 0.000 |
| 38 | -34800.587 | 7756.445 | 15.936 | -29414.611 | 0 | 2500 | 0.000 | -30045.908 | 0 | 2500 | 0.000 |
| 39 | -35301.295 | 8830.731 | 16.141 | -29783.408 | 0 | 2500 | 0.000 | -30363.633 | 0 | 2500 | 0.000 |
| 40 | -34721.879 | 8272.152 | 16.061 | -29403.147 | 0 | 2500 | 0.000 | -30002.148 | 0 | 2500 | 0.000 |
| 41 | -36139.492 | 8342.362 | 16.624 | -30531.779 | 0 | 2500 | 0.000 | -31148.887 | 0 | 2500 | 0.000 |
| 42 | -32163.514 | 8046.914 | 14.742 | -27121.608 | 0 | 2500 | 0.000 | -27674.469 | 0 | 2500 | 0.000 |
| 43 | -36683.289 | 9100.814 | 16.631 | -31119.663 | 0 | 2500 | 0.000 | -31731.596 | 0 | 2500 | 0.000 |
| 44 | -35360.460 | 7893.421 | 16.096 | -29969.854 | 0 | 2500 | 0.000 | -30588.549 | 0 | 2500 | 0.000 |
| 45 | -30249.586 | 7210.596 | 13.938 | -25815.309 | 0 | 2500 | 0.000 | -26336.481 | 0 | 2500 | 0.000 |
| 46 | -34046.365 | 7772.588 | 15.540 | -28865.102 | 0 | 2500 | 0.000 | -29443.710 | 0 | 2500 | 0.000 |
| 47 | -35833.615 | 8554.746 | 16.401 | -30421.715 | 0 | 2500 | 0.000 | -31036.347 | 0 | 2500 | 0.000 |
| 48 | -34206.881 | 8683.289 | 15.501 | -28974.054 | 0 | 2500 | 0.000 | -29526.766 | 0 | 2500 | 0.000 |
| 49 | -34315.850 | 8085.098 | 15.611 | -29059.992 | 0 | 2500 | 0.000 | -29661.443 | 0 | 2500 | 0.000 |
| 50 | -36722.340 | 7682.432 | 16.775 | -31117.824 | 0 | 2500 | 0.000 | -31718.418 | 0 | 2500 | 0.000 |
| 51 | -32864.642 | 8739.640 | 15.028 | -27833.991 | 0 | 2500 | 0.000 | -28377.722 | 0 | 2500 | 0.000 |
| 52 | -36309.313 | 9468.447 | 16.585 | -30900.454 | 0 | 2500 | 0.000 | -31533.173 | 0 | 2500 | 0.000 |
| 53 | -40853.518 | 9888.513 | 18.690 | -34595.680 | 0 | 2500 | 0.000 | -35282.969 | 0 | 2500 | 0.000 |
| 54 | -36243.114 | 9838.222 | 16.808 | -30766.364 | 0 | 2500 | 0.000 | -31394.967 | 0 | 2500 | 0.000 |
| 55 | -38405.709 | 8423.365 | 17.511 | -32395.725 | 0 | 2500 | 0.000 | -33017.066 | 0 | 2500 | 0.000 |
| 56 | -33190.774 | 7270.372 | 15.170 | -28079.897 | 0 | 2500 | 0.000 | -28650.372 | 0 | 2500 | 0.000 |
| 57 | -32675.998 | 8507.435 | 14.978 | -27518.758 | 0 | 2500 | 0.000 | -28071.465 | 0 | 2500 | 0.000 |
| 58 | -33381.242 | 7495.008 | 15.121 | -28327.069 | 0 | 2500 | 0.000 | -28880.561 | 0 | 2500 | 0.000 |
| 59 | -35184.422 | 8417.263 | 16.156 | -29752.792 | 0 | 2500 | 0.000 | -30364.173 | 0 | 2500 | 0.000 |
| 60 | -32608.238 | 7326.940 | 14.755 | -27692.530 | 0 | 2500 | 0.000 | -28260.308 | 0 | 2500 | 0.000 |
| 61 | -35338.538 | 7237.441 | 16.271 | -30020.869 | 0 | 2500 | 0.000 | -30600.733 | 0 | 2500 | 0.000 |
| 62 | -35160.975 | 7430.500 | 16.257 | -29781.479 | 0 | 2500 | 0.000 | -30379.421 | 0 | 2500 | 0.000 |
| 63 | -33774.414 | 8088.281 | 15.485 | -28642.072 | 0 | 2500 | 0.000 | -29215.206 | 0 | 2500 | 0.000 |
| 64 | -36833.897 | 7419.103 | 16.810 | -31333.633 | 0 | 2500 | 0.000 | -31941.693 | 0 | 2500 | 0.000 |
| 65 | -34985.152 | 8532.836 | 15.930 | -29755.693 | 0 | 2500 | 0.000 | -30368.340 | 0 | 2500 | 0.000 |
| 66 | -34286.117 | 7373.564 | 15.608 | -29070.308 | 0 | 2500 | 0.000 | -29641.463 | 0 | 2500 | 0.000 |
| 67 | -34926.362 | 8209.850 | 15.810 | -29632.811 | 0 | 2500 | 0.000 | -30254.280 | 0 | 2500 | 0.000 |
| 68 | -34560.591 | 7600.576 | 16.093 | -29245.465 | 0 | 2500 | 0.000 | -29846.425 | 0 | 2500 | 0.000 |
| 69 | -38180.805 | 7715.100 | 17.295 | -32302.837 | 0 | 2500 | 0.000 | -32978.686 | 0 | 2500 | 0.000 |
| 70 | -37289.160 | 9080.674 | 17.139 | -31592.338 | 0 | 2500 | 0.000 | -32227.417 | 0 | 2500 | 0.000 |
| 71 | -35471.627 | 8483.239 | 16.476 | -30088.544 | 0 | 2500 | 0.000 | -30679.051 | 0 | 2500 | 0.000 |
| 72 | -32638.487 | 7952.719 | 14.997 | -27540.393 | 0 | 2500 | 0.000 | -28111.843 | 0 | 2500 | 0.000 |
| 73 | -36761.496 | 7908.564 | 16.771 | -31145.453 | 0 | 2500 | 0.000 | -31788.033 | 0 | 2500 | 0.000 |
| 74 | -35585.371 | 9360.768 | 16.367 | -29942.957 | 0 | 2500 | 0.000 | -30520.761 | 0 | 2500 | 0.000 |
| 75 | -31722.920 | 6884.253 | 14.623 | -26805.605 | 0 | 2500 | 0.000 | -27371.086 | 0 | 2500 | 0.000 |
| 76 | -37403.672 | 8951.708 | 17.150 | -31705.004 | 0 | 2500 | 0.000 | -32348.793 | 0 | 2500 | 0.000 |
| 77 | -32248.085 | 7317.979 | 14.782 | -27370.485 | 0 | 2500 | 0.000 | -27944.346 | 0 | 2500 | 0.000 |
| 78 | -38091.193 | 9068.251 | 17.453 | -32335.662 | 0 | 2500 | 0.000 | -33020.508 | 0 | 2500 | 0.000 |
| 79 | -39412.344 | 8983.705 | 17.993 | -33331.005 | 0 | 2500 | 0.000 | -33950.168 | 0 | 2500 | 0.000 |
| 80 | -32572.122 | 7781.231 | 14.788 | -27604.454 | 0 | 2500 | 0.000 | -28136.030 | 0 | 2500 | 0.000 |
| 81 | -38762.360 | 9601.181 | 17.632 | -32768.610 | 0 | 2500 | 0.000 | -33445.429 | 0 | 2500 | 0.000 |
| 82 | -35011.645 | 8067.814 | 16.105 | -29675.264 | 0 | 2500 | 0.000 | -30310.771 | 0 | 2500 | 0.000 |
| 83 | -37997.938 | 8678.927 | 17.236 | -32218.627 | 0 | 2500 | 0.000 | -32869.897 | 0 | 2500 | 0.000 |
| 84 | -37751.578 | 8138.958 | 17.289 | -31883.172 | 0 | 2500 | 0.000 | -32540.067 | 0 | 2500 | 0.000 |
| 85 | -38247.821 | 8865.308 | 17.462 | -32460.199 | 0 | 2500 | 0.000 | -33079.674 | 0 | 2500 | 0.000 |
| 86 | -32600.917 | 7806.687 | 14.841 | -27695.044 | 0 | 2500 | 0.000 | -28243.602 | 0 | 2500 | 0.000 |
| 87 | -34348.999 | 8390.120 | 15.739 | -29010.681 | 0 | 2500 | 0.000 | -29578.229 | 0 | 2500 | 0.000 |
| 88 | -34479.519 | 8272.529 | 15.993 | -29268.907 | 0 | 2500 | 0.000 | -29856.306 | 0 | 2500 | 0.000 |
| 89 | -32858.884 | 8024.183 | 14.971 | -27924.785 | 0 | 2500 | 0.000 | -28472.445 | 0 | 2500 | 0.000 |
| 90 | -35292.421 | 8000.068 | 16.056 | -30133.284 | 0 | 2500 | 0.000 | -30700.526 | 0 | 2500 | 0.000 |
| 91 | -34252.900 | 8446.774 | 15.536 | -28946.842 | 0 | 2500 | 0.000 | -29535.753 | 0 | 2500 | 0.000 |
| 92 | -32745.293 | 8724.329 | 15.030 | -27576.301 | 0 | 2500 | 0.000 | -28127.504 | 0 | 2500 | 0.000 |
| 93 | -34733.447 | 8147.429 | 16.062 | -29486.046 | 0 | 2500 | 0.000 | -30092.265 | 0 | 2500 | 0.000 |

|                  |     |             |           |        |             |     |        |       |             |     |        |       |
|------------------|-----|-------------|-----------|--------|-------------|-----|--------|-------|-------------|-----|--------|-------|
|                  | 94  | -35425.359  | 8222.194  | 16.252 | -30021.433  | 0   | 2500   | 0.000 | -30618.858  | 0   | 2500   | 0.000 |
|                  | 95  | -37606.544  | 8200.226  | 17.376 | -31843.837  | 0   | 2500   | 0.000 | -32485.781  | 0   | 2500   | 0.000 |
|                  | 96  | -35827.461  | 7543.195  | 16.580 | -30401.233  | 0   | 2500   | 0.000 | -31027.778  | 0   | 2500   | 0.000 |
|                  | 97  | -30610.279  | 7353.275  | 13.984 | -25997.114  | 0   | 2500   | 0.000 | -26514.749  | 0   | 2500   | 0.000 |
|                  | 98  | -34847.780  | 8865.370  | 15.773 | -29410.225  | 0   | 2500   | 0.000 | -29953.078  | 0   | 2500   | 0.000 |
|                  | 99  | -36669.387  | 8722.080  | 16.559 | -31155.104  | 0   | 2500   | 0.000 | -31770.040  | 0   | 2500   | 0.000 |
|                  | 100 | -34386.489  | 7679.019  | 15.504 | -29129.380  | 0   | 2500   | 0.000 | -29744.466  | 0   | 2500   | 0.000 |
| <b>Mean</b>      |     | -35406.036  | 8305.193  | 16.193 | -29995.066  | 0.0 | 2500.0 | 0.000 | -30596.746  | 0.0 | 2500.0 | 0.000 |
| <b>Std. Err.</b> |     | 227.688     | 66.301    | 0.105  | 192.746     | 0.0 | 0.0    | 0.000 | 196.172     | 0.0 | 0.0    | 0.000 |
| Mammalia         | 1   | -206103.290 | 64500.162 | 26.087 | -177340.184 | 0   | 2500   | 0.000 | -180136.975 | 0   | 2500   | 0.000 |
|                  | 2   | -210963.155 | 65107.756 | 26.941 | -181494.494 | 0   | 2500   | 0.000 | -184329.369 | 0   | 2500   | 0.000 |
|                  | 3   | -202253.757 | 58571.524 | 25.796 | -173865.322 | 0   | 2500   | 0.000 | -176726.665 | 0   | 2500   | 0.000 |
|                  | 4   | -210027.347 | 64652.840 | 26.586 | -180624.721 | 0   | 2500   | 0.000 | -183487.255 | 0   | 2500   | 0.000 |
|                  | 5   | -207414.693 | 64116.759 | 26.790 | -178088.400 | 0   | 2500   | 0.000 | -180934.819 | 0   | 2500   | 0.000 |
|                  | 6   | -194473.117 | 61410.226 | 25.209 | -167564.772 | 0   | 2500   | 0.000 | -170214.167 | 0   | 2500   | 0.000 |
|                  | 7   | -193598.200 | 56015.542 | 24.542 | -166836.933 | 0   | 2500   | 0.000 | -169530.068 | 0   | 2500   | 0.000 |
|                  | 8   | -210609.700 | 68828.979 | 26.947 | -180568.261 | 0   | 2500   | 0.000 | -183411.006 | 0   | 2500   | 0.000 |
|                  | 9   | -211966.722 | 62400.097 | 27.342 | -182395.019 | 0   | 2500   | 0.000 | -185334.249 | 0   | 2500   | 0.000 |
|                  | 10  | -199495.899 | 65214.371 | 25.570 | -171448.069 | 0   | 2500   | 0.000 | -174094.286 | 0   | 2500   | 0.000 |
|                  | 11  | -191949.878 | 60065.842 | 24.075 | -164903.111 | 0   | 2500   | 0.000 | -167572.293 | 0   | 2500   | 0.000 |
|                  | 12  | -211801.776 | 62860.896 | 27.409 | -182374.882 | 0   | 2500   | 0.000 | -185349.665 | 0   | 2500   | 0.000 |
|                  | 13  | -206578.876 | 62135.927 | 26.443 | -177791.912 | 0   | 2500   | 0.000 | -180585.956 | 0   | 2500   | 0.000 |
|                  | 14  | -213154.352 | 65225.397 | 27.606 | -183548.413 | 0   | 2500   | 0.000 | -186545.002 | 0   | 2500   | 0.000 |
|                  | 15  | -205172.770 | 61451.144 | 26.798 | -176799.603 | 0   | 2500   | 0.000 | -179717.092 | 0   | 2500   | 0.000 |
|                  | 16  | -207814.064 | 62551.589 | 26.896 | -178954.812 | 0   | 2500   | 0.000 | -181843.138 | 0   | 2500   | 0.000 |
|                  | 17  | -210982.782 | 67498.293 | 27.278 | -181339.488 | 0   | 2500   | 0.000 | -184183.244 | 0   | 2500   | 0.000 |
|                  | 18  | -195384.669 | 61585.995 | 24.677 | -168233.821 | 0   | 2500   | 0.000 | -170866.221 | 0   | 2500   | 0.000 |
|                  | 19  | -200725.229 | 60955.320 | 25.501 | -173085.023 | 0   | 2500   | 0.000 | -175745.709 | 0   | 2500   | 0.000 |
|                  | 20  | -213999.845 | 62398.826 | 27.895 | -184705.348 | 0   | 2500   | 0.000 | -187542.534 | 0   | 2500   | 0.000 |
|                  | 21  | -204135.543 | 59609.201 | 26.411 | -175411.400 | 0   | 2500   | 0.000 | -178316.505 | 0   | 2500   | 0.000 |
|                  | 22  | -201445.385 | 62181.363 | 25.610 | -173569.058 | 0   | 2500   | 0.000 | -176349.571 | 0   | 2500   | 0.000 |
|                  | 23  | -202137.159 | 56155.955 | 26.021 | -174192.424 | 0   | 2500   | 0.000 | -177099.128 | 0   | 2500   | 0.000 |
|                  | 24  | -209180.609 | 62856.453 | 26.686 | -179748.919 | 0   | 2500   | 0.000 | -182565.649 | 0   | 2500   | 0.000 |
|                  | 25  | -197746.287 | 60062.275 | 25.092 | -170407.755 | 0   | 2500   | 0.000 | -173119.967 | 0   | 2500   | 0.000 |
|                  | 26  | -212574.442 | 62439.833 | 26.792 | -182915.320 | 0   | 2500   | 0.000 | -185767.202 | 0   | 2500   | 0.000 |
|                  | 27  | -214312.030 | 62992.940 | 27.623 | -184803.253 | 0   | 2500   | 0.000 | -187776.912 | 0   | 2500   | 0.000 |
|                  | 28  | -197574.340 | 58027.596 | 25.031 | -170459.596 | 0   | 2500   | 0.000 | -173181.155 | 0   | 2500   | 0.000 |
|                  | 29  | -188885.017 | 53525.461 | 23.990 | -162663.805 | 0   | 2500   | 0.000 | -165294.061 | 0   | 2500   | 0.000 |
|                  | 30  | -216302.236 | 65455.610 | 28.096 | -186271.623 | 0   | 2500   | 0.000 | -189295.697 | 0   | 2500   | 0.000 |
|                  | 31  | -202740.958 | 63785.529 | 25.933 | -174623.464 | 0   | 2500   | 0.000 | -177390.919 | 0   | 2500   | 0.000 |
|                  | 32  | -196895.334 | 57017.308 | 25.244 | -169998.171 | 0   | 2500   | 0.000 | -172731.188 | 0   | 2500   | 0.000 |
|                  | 33  | -213589.584 | 65483.384 | 28.131 | -183509.821 | 0   | 2500   | 0.000 | -186524.951 | 0   | 2500   | 0.000 |
|                  | 34  | -214075.691 | 68774.243 | 27.620 | -183871.009 | 0   | 2500   | 0.000 | -186760.238 | 0   | 2500   | 0.000 |
|                  | 35  | -196484.944 | 57791.504 | 24.596 | -169837.779 | 0   | 2500   | 0.000 | -172466.039 | 0   | 2500   | 0.000 |
|                  | 36  | -207515.323 | 65448.006 | 26.678 | -178441.930 | 0   | 2500   | 0.000 | -181256.616 | 0   | 2500   | 0.000 |
|                  | 37  | -198597.684 | 60606.765 | 24.671 | -170731.179 | 0   | 2500   | 0.000 | -173357.776 | 0   | 2500   | 0.000 |
|                  | 38  | -187944.033 | 56955.118 | 23.611 | -161824.792 | 0   | 2500   | 0.000 | -164353.123 | 0   | 2500   | 0.000 |
|                  | 39  | -214452.795 | 65925.568 | 27.808 | -184685.638 | 0   | 2500   | 0.000 | -187625.559 | 0   | 2500   | 0.000 |
|                  | 40  | -224957.715 | 73814.448 | 29.345 | -193149.382 | 0   | 2500   | 0.000 | -196193.900 | 0   | 2500   | 0.000 |
|                  | 41  | -204395.413 | 60040.450 | 26.103 | -175953.452 | 0   | 2500   | 0.000 | -178760.939 | 0   | 2500   | 0.000 |
|                  | 42  | -204003.922 | 57061.565 | 26.222 | -175867.491 | 0   | 2500   | 0.000 | -178761.679 | 0   | 2500   | 0.000 |
|                  | 43  | -194652.486 | 59726.825 | 24.821 | -167914.964 | 0   | 2500   | 0.000 | -170591.149 | 0   | 2500   | 0.000 |
|                  | 44  | -201292.505 | 59526.839 | 25.857 | -172818.278 | 0   | 2500   | 0.000 | -175626.690 | 0   | 2500   | 0.000 |
|                  | 45  | -206352.432 | 60326.657 | 26.498 | -177782.884 | 0   | 2500   | 0.000 | -180678.168 | 0   | 2500   | 0.000 |
|                  | 46  | -204635.979 | 60070.788 | 25.928 | -176452.361 | 0   | 2091   | 0.000 | -179206.282 | 0   | 2091   | 0.000 |
|                  | 47  | -195941.516 | 57203.653 | 24.937 | -168653.641 | 0   | 2500   | 0.000 | -171348.403 | 0   | 2500   | 0.000 |
|                  | 48  | -208455.203 | 64941.942 | 26.273 | -178984.667 | 0   | 2500   | 0.000 | -181808.827 | 0   | 2500   | 0.000 |
|                  | 49  | -205196.411 | 60769.022 | 26.437 | -176453.732 | 0   | 2500   | 0.000 | -179308.183 | 0   | 2500   | 0.000 |
|                  | 50  | -212511.591 | 64101.207 | 27.296 | -182767.060 | 0   | 2500   | 0.000 | -185738.988 | 0   | 2500   | 0.000 |
|                  | 51  | -202327.257 | 59311.833 | 25.958 | -174013.735 | 0   | 2500   | 0.000 | -176953.730 | 0   | 2500   | 0.000 |
|                  | 52  | -203280.436 | 62470.905 | 26.210 | -175031.265 | 0   | 2500   | 0.000 | -177687.774 | 0   | 2500   | 0.000 |
|                  | 53  | -210142.530 | 62439.285 | 26.853 | -180691.634 | 0   | 2500   | 0.000 | -183536.483 | 0   | 2500   | 0.000 |
|                  | 54  | -202293.391 | 59125.770 | 25.713 | -173976.986 | 0   | 2500   | 0.000 | -176705.037 | 0   | 2500   | 0.000 |
|                  | 55  | -204662.802 | 61963.677 | 25.904 | -175864.737 | 0   | 2500   | 0.000 | -178687.283 | 0   | 2500   | 0.000 |
|                  | 56  | -198298.324 | 59554.660 | 25.026 | -171151.978 | 0   | 2500   | 0.000 | -173839.604 | 0   | 2500   | 0.000 |

|                  |             |           |        |             |     |        |       |             |     |        |       |
|------------------|-------------|-----------|--------|-------------|-----|--------|-------|-------------|-----|--------|-------|
| 57               | -205074.358 | 59398.227 | 26.324 | -176971.182 | 0   | 2500   | 0.000 | -179843.212 | 0   | 2500   | 0.000 |
| 58               | -197192.466 | 57554.248 | 25.144 | -169986.207 | 0   | 2500   | 0.000 | -172695.004 | 0   | 2500   | 0.000 |
| 59               | -207791.702 | 62678.883 | 27.110 | -178477.669 | 0   | 2500   | 0.000 | -181387.919 | 0   | 2500   | 0.000 |
| 60               | -195382.357 | 58903.531 | 24.893 | -168181.366 | 0   | 2500   | 0.000 | -170876.910 | 0   | 2500   | 0.000 |
| 61               | -196452.034 | 61450.095 | 24.733 | -169162.424 | 0   | 2500   | 0.000 | -171843.105 | 0   | 2500   | 0.000 |
| 62               | -206258.440 | 66185.602 | 26.395 | -176992.744 | 0   | 2500   | 0.000 | -179830.133 | 0   | 2500   | 0.000 |
| 63               | -199178.670 | 56379.650 | 25.446 | -171358.565 | 0   | 2500   | 0.000 | -174198.594 | 0   | 2500   | 0.000 |
| 64               | -201153.848 | 59332.026 | 25.900 | -173494.500 | 0   | 2500   | 0.000 | -176287.799 | 0   | 2500   | 0.000 |
| 65               | -187607.523 | 57348.719 | 23.354 | -161587.879 | 0   | 2500   | 0.000 | -164171.351 | 0   | 2500   | 0.000 |
| 66               | -206978.625 | 60244.413 | 26.368 | -178177.628 | 0   | 2500   | 0.000 | -181084.246 | 0   | 2500   | 0.000 |
| 67               | -195071.174 | 60367.373 | 24.619 | -168009.135 | 0   | 2500   | 0.000 | -170607.895 | 0   | 2500   | 0.000 |
| 68               | -212644.066 | 63359.087 | 27.849 | -182899.563 | 0   | 2500   | 0.000 | -185864.513 | 0   | 2500   | 0.000 |
| 69               | -204349.567 | 62714.347 | 26.360 | -175630.854 | 0   | 2500   | 0.000 | -178371.534 | 0   | 2500   | 0.000 |
| 70               | -213442.905 | 65302.462 | 27.172 | -184051.170 | 0   | 2500   | 0.000 | -186940.791 | 0   | 2500   | 0.000 |
| 71               | -207126.907 | 65037.405 | 26.612 | -177986.583 | 0   | 2500   | 0.000 | -180760.090 | 0   | 2500   | 0.000 |
| 72               | -205388.717 | 67684.863 | 26.398 | -176479.089 | 0   | 2500   | 0.000 | -179220.838 | 0   | 2500   | 0.000 |
| 73               | -195190.530 | 54880.764 | 24.889 | -168315.140 | 0   | 2500   | 0.000 | -171041.841 | 0   | 2500   | 0.000 |
| 74               | -211835.308 | 63881.692 | 27.209 | -182464.277 | 0   | 2500   | 0.000 | -185471.158 | 0   | 2500   | 0.000 |
| 75               | -199051.611 | 58847.415 | 25.442 | -171076.624 | 0   | 2500   | 0.000 | -173951.033 | 0   | 2500   | 0.000 |
| 76               | -207246.411 | 59427.346 | 26.661 | -178819.267 | 0   | 2500   | 0.000 | -181692.404 | 0   | 2500   | 0.000 |
| 77               | -185776.031 | 53080.325 | 23.731 | -160264.537 | 0   | 2500   | 0.000 | -162866.317 | 0   | 2500   | 0.000 |
| 78               | -204042.249 | 60983.931 | 26.594 | -175598.305 | 0   | 2500   | 0.000 | -178358.589 | 0   | 2500   | 0.000 |
| 79               | -202135.003 | 58282.592 | 26.100 | -173891.719 | 0   | 2500   | 0.000 | -176724.060 | 0   | 2500   | 0.000 |
| 80               | -209841.060 | 63558.814 | 27.096 | -180669.698 | 0   | 2500   | 0.000 | -183534.886 | 0   | 2500   | 0.000 |
| 81               | -197307.807 | 56182.785 | 25.590 | -170354.165 | 0   | 2500   | 0.000 | -173142.417 | 0   | 2500   | 0.000 |
| 82               | -200105.875 | 61172.282 | 25.247 | -172235.495 | 0   | 2500   | 0.000 | -174972.545 | 0   | 2500   | 0.000 |
| 83               | -195536.752 | 61722.021 | 24.879 | -168118.729 | 0   | 2500   | 0.000 | -170752.785 | 0   | 2500   | 0.000 |
| 84               | -197479.101 | 58175.776 | 25.454 | -169995.437 | 0   | 2500   | 0.000 | -172742.329 | 0   | 2500   | 0.000 |
| 85               | -200487.709 | 59077.766 | 25.781 | -172784.836 | 0   | 2500   | 0.000 | -175577.248 | 0   | 2500   | 0.000 |
| 86               | -214507.740 | 65451.979 | 28.132 | -184303.608 | 0   | 2500   | 0.000 | -187236.374 | 0   | 2500   | 0.000 |
| 87               | -198859.727 | 60524.668 | 25.246 | -171094.426 | 0   | 2500   | 0.000 | -173833.963 | 0   | 2500   | 0.000 |
| 88               | -210261.776 | 63693.741 | 26.747 | -180878.474 | 0   | 2500   | 0.000 | -183711.115 | 0   | 2500   | 0.000 |
| 89               | -201892.732 | 60071.593 | 26.285 | -173490.520 | 0   | 2500   | 0.000 | -176378.750 | 0   | 2500   | 0.000 |
| 90               | -196633.457 | 55411.572 | 25.089 | -169511.329 | 0   | 2500   | 0.000 | -172234.774 | 0   | 2500   | 0.000 |
| 91               | -199500.928 | 55749.623 | 25.729 | -172063.273 | 0   | 2500   | 0.000 | -174844.576 | 0   | 2500   | 0.000 |
| 92               | -215272.598 | 69483.229 | 28.002 | -184854.546 | 0   | 2500   | 0.000 | -187816.992 | 0   | 2500   | 0.000 |
| 93               | -203701.807 | 59086.438 | 25.794 | -175860.215 | 0   | 2500   | 0.000 | -178624.225 | 0   | 2500   | 0.000 |
| 94               | -196111.010 | 56939.131 | 24.724 | -168710.189 | 0   | 2500   | 0.000 | -171372.112 | 0   | 2500   | 0.000 |
| 95               | -200479.207 | 58261.205 | 26.047 | -172677.959 | 0   | 2500   | 0.000 | -175536.988 | 0   | 2500   | 0.000 |
| 96               | -186550.673 | 52570.145 | 23.577 | -160916.080 | 0   | 2500   | 0.000 | -163512.728 | 0   | 2500   | 0.000 |
| 97               | -209964.113 | 62357.857 | 27.538 | -180953.501 | 0   | 2500   | 0.000 | -183872.365 | 0   | 2500   | 0.000 |
| 98               | -201886.580 | 60054.401 | 25.350 | -173725.086 | 0   | 2500   | 0.000 | -176444.097 | 0   | 2500   | 0.000 |
| 99               | -211877.170 | 60902.409 | 27.212 | -182516.279 | 0   | 2500   | 0.000 | -185474.563 | 0   | 2500   | 0.000 |
| 100              | -218206.503 | 66165.653 | 28.425 | -188099.754 | 0   | 2500   | 0.000 | -191124.386 | 0   | 2500   | 0.000 |
| <b>Mean</b>      | -203772.943 | 61250.292 | 26.107 | -175411.478 | 0.0 | 2495.9 | 0.000 | -178216.446 | 0.0 | 2495.9 | 0.000 |
| <b>Std. Err.</b> | 758.282     | 374.891   | 0.118  | 644.373     | 0.0 | 4.1    | 0.000 | 654.522     | 0.0 | 4.1    | 0.000 |

\* The column legends are the same as Table S2.
