# Supplementary material for: Cross-Scale Analyses of Animal and Human Gut Microbiome Assemblies from Metacommunity to Global Landscape
Source: PubMed Central journal article supplement (PMC8407200; doi:10.1128/msystems.00633-21), 2021-07-06
Supplement: msystems.00633-21-st006.pdf [file msystems.00633-21-st006.pdf]

**Table S6.** Fitting the MSN model at the microbiome global landscape level (or animal host kingdom level): 100 AGM samples were randomly taken (one from each of the 153 animal host species with PT information available), treated as a super-super-metacommunity representing for the animal kingdom, and used to fit the MSN model. The fitting process was repeated for 100 times by 100 times of re-sampling, and therefore a total of 100 MSN models were built at the global landscape level (Due to the computational limitation, the samples with more than 30,000 reads were excluded occasionally)\*.

| Sampling No. | $L_O$       | $\theta$  | $M$ -value | Metacommunity |       |      |       | Local community |       |      |       |
|--------------|-------------|-----------|------------|---------------|-------|------|-------|-----------------|-------|------|-------|
|              |             |           |            | $L_M$         | $N_M$ | $N$  | $P_M$ | $L_L$           | $N_L$ | $N$  | $P_L$ |
| 1            | -171602.076 | 42550.108 | 23.243     | -147163.324   | 3     | 2499 | 0.001 | -149753.929     | 3     | 2499 | 0.001 |
| 2            | -159930.257 | 40959.421 | 21.535     | -137209.861   | 2     | 2500 | 0.001 | -139551.642     | 2     | 2500 | 0.001 |
| 3            | -178075.806 | 49552.623 | 23.878     | -153006.191   | 0     | 2500 | 0.000 | -155587.682     | 0     | 2500 | 0.000 |
| 4            | -157760.381 | 44530.758 | 21.145     | -135554.747   | 1     | 2496 | 0.000 | -137817.745     | 1     | 2496 | 0.000 |
| 5            | -148303.759 | 46931.297 | 19.562     | -127282.677   | 2     | 2497 | 0.001 | -129308.742     | 2     | 2497 | 0.001 |
| 6            | -169129.024 | 40688.632 | 23.209     | -145712.269   | 2     | 2500 | 0.001 | -148221.891     | 2     | 2500 | 0.001 |
| 7            | -165309.116 | 47136.296 | 22.055     | -141962.737   | 2     | 2496 | 0.001 | -144301.708     | 1     | 2495 | 0.000 |
| 8            | -171339.431 | 38986.772 | 23.607     | -148308.025   | 0     | 2500 | 0.000 | -150909.306     | 0     | 2500 | 0.000 |
| 9            | -170955.225 | 53484.555 | 23.018     | -146876.260   | 0     | 2497 | 0.000 | -149163.472     | 0     | 2497 | 0.000 |
| 10           | -180348.053 | 48999.383 | 24.365     | -154635.673   | 0     | 2500 | 0.000 | -157278.591     | 0     | 2500 | 0.000 |
| 11           | -155991.046 | 45819.729 | 20.471     | -134457.487   | 0     | 2500 | 0.000 | -136595.167     | 0     | 2500 | 0.000 |
| 12           | -172936.135 | 47302.951 | 23.048     | -148640.245   | 2     | 2496 | 0.001 | -151179.763     | 3     | 2496 | 0.001 |
| 13           | -158205.782 | 36875.641 | 21.328     | -136052.157   | 0     | 2500 | 0.000 | -138436.793     | 0     | 2500 | 0.000 |
| 14           | -186869.113 | 64568.549 | 25.185     | -160212.903   | 1     | 2500 | 0.000 | -162663.988     | 1     | 2500 | 0.000 |
| 15           | -166148.469 | 40806.897 | 21.786     | -143408.620   | 1     | 2498 | 0.000 | -145822.111     | 1     | 2498 | 0.000 |
| 16           | -142511.043 | 36350.318 | 18.397     | -122630.089   | 1     | 2500 | 0.000 | -124725.441     | 1     | 2500 | 0.000 |
| 17           | -150226.054 | 40821.885 | 20.018     | -128629.300   | 1     | 2497 | 0.000 | -130732.281     | 1     | 2497 | 0.000 |
| 18           | -173387.439 | 46184.738 | 23.985     | -149599.312   | 2     | 2500 | 0.001 | -152173.722     | 2     | 2500 | 0.001 |
| 19           | -159097.664 | 34391.645 | 21.446     | -137723.900   | 1     | 2498 | 0.000 | -140154.076     | 1     | 2498 | 0.000 |
| 20           | -170182.135 | 38333.137 | 23.271     | -147295.640   | 1     | 2499 | 0.000 | -149826.325     | 2     | 2499 | 0.001 |
| 21           | -175571.629 | 47345.388 | 23.335     | -151090.263   | 1     | 2499 | 0.000 | -153639.046     | 1     | 2499 | 0.000 |
| 22           | -161765.403 | 47999.862 | 20.871     | -138529.646   | 1     | 2498 | 0.000 | -140800.984     | 1     | 2498 | 0.000 |
| 23           | -187993.921 | 54509.247 | 25.574     | -161044.994   | 3     | 2498 | 0.001 | -163633.242     | 3     | 2498 | 0.001 |
| 24           | -175334.458 | 39787.774 | 23.796     | -151728.258   | 2     | 2500 | 0.001 | -154352.131     | 2     | 2500 | 0.001 |
| 25           | -167399.768 | 49141.138 | 22.329     | -143830.340   | 0     | 2500 | 0.000 | -146108.331     | 0     | 2500 | 0.000 |
| 26           | -186835.403 | 62382.920 | 24.936     | -160234.417   | 0     | 2499 | 0.000 | -162649.430     | 0     | 2499 | 0.000 |
| 27           | -173136.184 | 49680.221 | 23.216     | -148632.667   | 0     | 2499 | 0.000 | -151100.365     | 0     | 2499 | 0.000 |
| 28           | -167639.105 | 48061.729 | 21.851     | -143930.814   | 0     | 2500 | 0.000 | -146232.014     | 0     | 2500 | 0.000 |
| 29           | -174486.162 | 40972.040 | 24.278     | -150469.752   | 0     | 2496 | 0.000 | -153188.116     | 0     | 2496 | 0.000 |
| 30           | -174682.158 | 43700.686 | 23.542     | -150652.813   | 0     | 2499 | 0.000 | -153263.969     | 0     | 2499 | 0.000 |
| 31           | -198928.212 | 48228.853 | 27.427     | -171234.798   | 1     | 2496 | 0.000 | -174228.823     | 1     | 2496 | 0.000 |
| 32           | -183233.744 | 44987.475 | 25.251     | -157687.027   | 2     | 2500 | 0.001 | -160393.492     | 2     | 2500 | 0.001 |
| 33           | -129408.075 | 32278.302 | 16.945     | -111335.467   | 1     | 2498 | 0.000 | -113247.536     | 1     | 2498 | 0.000 |
| 34           | -166626.706 | 41054.914 | 22.126     | -143173.296   | 0     | 2495 | 0.000 | -145622.307     | 0     | 2495 | 0.000 |
| 35           | -152161.715 | 30336.901 | 20.965     | -132148.661   | 1     | 2499 | 0.000 | -134366.478     | 1     | 2499 | 0.000 |
| 36           | -165686.537 | 43127.709 | 22.690     | -142792.495   | 0     | 2500 | 0.000 | -145192.650     | 0     | 2500 | 0.000 |
| 37           | -185868.279 | 57060.041 | 24.258     | -159609.443   | 0     | 2500 | 0.000 | -162184.703     | 0     | 2500 | 0.000 |
| 38           | -163128.918 | 47348.788 | 21.515     | -139819.108   | 0     | 2498 | 0.000 | -142219.014     | 0     | 2498 | 0.000 |

|    |             |           |        |             |   |      |       |             |   |      |       |
|----|-------------|-----------|--------|-------------|---|------|-------|-------------|---|------|-------|
| 39 | -168114.836 | 41204.255 | 22.763 | -144744.982 | 2 | 2497 | 0.001 | -147233.132 | 2 | 2497 | 0.001 |
| 40 | -169114.481 | 36881.446 | 23.151 | -145590.213 | 0 | 2500 | 0.000 | -148256.691 | 0 | 2500 | 0.000 |
| 41 | -186385.357 | 58002.720 | 26.077 | -159756.159 | 2 | 2495 | 0.001 | -162357.599 | 2 | 2495 | 0.001 |
| 42 | -149439.820 | 39036.639 | 20.450 | -128622.643 | 0 | 2497 | 0.000 | -130825.076 | 0 | 2497 | 0.000 |
| 43 | -167156.176 | 40763.431 | 23.238 | -144283.995 | 1 | 2499 | 0.000 | -146818.532 | 1 | 2499 | 0.000 |
| 44 | -190510.057 | 50889.496 | 26.710 | -163772.120 | 2 | 2499 | 0.001 | -166657.682 | 2 | 2499 | 0.001 |
| 45 | -165711.414 | 57342.859 | 22.054 | -141848.145 | 0 | 2500 | 0.000 | -144037.729 | 0 | 2500 | 0.000 |
| 46 | -157885.394 | 36979.001 | 21.483 | -136499.527 | 1 | 2497 | 0.000 | -138815.572 | 2 | 2498 | 0.001 |
| 47 | -175323.871 | 54151.717 | 23.430 | -150407.497 | 0 | 2500 | 0.000 | -152810.792 | 0 | 2500 | 0.000 |
| 48 | -192242.862 | 49049.181 | 25.987 | -165668.317 | 1 | 2497 | 0.000 | -168573.668 | 1 | 2497 | 0.000 |
| 49 | -189596.690 | 61255.246 | 25.560 | -163083.254 | 0 | 2500 | 0.000 | -165579.879 | 0 | 2500 | 0.000 |
| 50 | -171629.059 | 35173.769 | 24.178 | -148464.398 | 2 | 2499 | 0.001 | -151107.547 | 2 | 2499 | 0.001 |
| 51 | -167260.366 | 50964.993 | 22.159 | -143004.467 | 0 | 2497 | 0.000 | -145353.977 | 0 | 2497 | 0.000 |
| 52 | -167864.558 | 40604.905 | 22.627 | -145107.356 | 0 | 2500 | 0.000 | -147649.041 | 0 | 2500 | 0.000 |
| 53 | -167766.405 | 42501.054 | 22.723 | -144343.490 | 2 | 2497 | 0.001 | -146904.891 | 2 | 2497 | 0.001 |
| 54 | -168742.697 | 49281.387 | 22.567 | -145032.488 | 0 | 2500 | 0.000 | -147416.623 | 0 | 2500 | 0.000 |
| 55 | -170928.115 | 44813.812 | 22.214 | -147100.877 | 1 | 2497 | 0.000 | -149624.622 | 1 | 2497 | 0.000 |
| 56 | -169776.889 | 41102.485 | 23.312 | -146820.010 | 1 | 2500 | 0.000 | -149359.086 | 2 | 2500 | 0.001 |
| 57 | -163074.361 | 50035.012 | 22.081 | -139890.355 | 0 | 2500 | 0.000 | -142138.947 | 0 | 2500 | 0.000 |
| 58 | -154563.051 | 35763.964 | 21.164 | -133350.271 | 1 | 2500 | 0.000 | -135690.411 | 1 | 2500 | 0.000 |
| 59 | -179717.936 | 45298.410 | 25.006 | -154463.324 | 2 | 2498 | 0.001 | -157099.845 | 2 | 2498 | 0.001 |
| 60 | -175041.466 | 43324.435 | 23.447 | -150812.923 | 3 | 2500 | 0.001 | -153462.873 | 3 | 2500 | 0.001 |
| 61 | -181514.748 | 42550.123 | 25.239 | -156506.852 | 0 | 2500 | 0.000 | -159258.042 | 0 | 2500 | 0.000 |
| 62 | -161029.450 | 46355.717 | 21.668 | -137966.194 | 0 | 2500 | 0.000 | -140309.355 | 0 | 2500 | 0.000 |
| 63 | -185397.693 | 45827.844 | 25.483 | -160184.789 | 0 | 2500 | 0.000 | -162939.003 | 0 | 2500 | 0.000 |
| 64 | -170029.303 | 36771.833 | 23.625 | -146830.413 | 1 | 2495 | 0.000 | -149426.023 | 1 | 2495 | 0.000 |
| 65 | -176219.274 | 42685.871 | 23.633 | -151735.494 | 0 | 2500 | 0.000 | -154346.243 | 0 | 2500 | 0.000 |
| 66 | -156476.864 | 42493.432 | 20.572 | -134191.559 | 1 | 2498 | 0.000 | -136408.888 | 1 | 2498 | 0.000 |
| 67 | -164072.661 | 38049.699 | 22.597 | -141810.526 | 1 | 2500 | 0.000 | -144301.575 | 1 | 2500 | 0.000 |
| 68 | -184775.631 | 48285.684 | 25.004 | -159202.121 | 3 | 2496 | 0.001 | -161961.816 | 4 | 2496 | 0.002 |
| 69 | -151352.218 | 42905.992 | 19.730 | -130985.016 | 0 | 2500 | 0.000 | -133136.252 | 0 | 2500 | 0.000 |
| 70 | -160965.884 | 43643.169 | 21.575 | -138654.152 | 0 | 2499 | 0.000 | -140997.973 | 0 | 2499 | 0.000 |
| 71 | -165918.865 | 42158.528 | 23.393 | -143158.710 | 1 | 2497 | 0.000 | -145655.692 | 1 | 2497 | 0.000 |
| 72 | -167290.387 | 37863.959 | 22.588 | -144177.362 | 3 | 2499 | 0.001 | -146658.908 | 3 | 2499 | 0.001 |
| 73 | -158647.285 | 35635.837 | 21.778 | -136626.555 | 0 | 2500 | 0.000 | -139038.067 | 0 | 2500 | 0.000 |
| 74 | -167334.034 | 52886.570 | 22.412 | -144009.924 | 1 | 2497 | 0.000 | -146377.410 | 1 | 2497 | 0.000 |
| 75 | -153701.728 | 45687.802 | 21.062 | -131661.351 | 0 | 2499 | 0.000 | -133918.165 | 0 | 2499 | 0.000 |
| 76 | -174937.705 | 49619.248 | 23.484 | -150217.521 | 2 | 2498 | 0.001 | -152691.747 | 2 | 2498 | 0.001 |
| 77 | -186804.952 | 55388.049 | 24.499 | -159901.247 | 1 | 2491 | 0.000 | -162523.885 | 1 | 2491 | 0.000 |
| 78 | -152649.693 | 30684.039 | 20.960 | -131934.366 | 0 | 2219 | 0.000 | -134223.247 | 0 | 2219 | 0.000 |
| 79 | -181824.342 | 47652.623 | 24.514 | -156320.916 | 2 | 2497 | 0.001 | -159018.468 | 2 | 2497 | 0.001 |
| 80 | -172421.137 | 44083.889 | 22.989 | -148382.212 | 1 | 2497 | 0.000 | -150919.001 | 1 | 2497 | 0.000 |
| 81 | -164816.443 | 43185.721 | 22.227 | -142255.853 | 3 | 2494 | 0.001 | -144641.091 | 3 | 2494 | 0.001 |
| 82 | -161874.744 | 42463.668 | 21.177 | -139237.646 | 2 | 2499 | 0.001 | -141521.412 | 1 | 2498 | 0.000 |
| 83 | -171329.575 | 38336.089 | 23.395 | -147894.410 | 1 | 2500 | 0.000 | -150451.549 | 1 | 2500 | 0.000 |
| 84 | -179108.594 | 38532.750 | 24.595 | -154724.422 | 0 | 2498 | 0.000 | -157466.729 | 0 | 2498 | 0.000 |
| 85 | -161931.585 | 47926.429 | 21.832 | -139601.143 | 3 | 2497 | 0.001 | -141868.258 | 3 | 2497 | 0.001 |

|                         |             |           |        |             |       |        |       |             |       |        |       |
|-------------------------|-------------|-----------|--------|-------------|-------|--------|-------|-------------|-------|--------|-------|
| 86                      | -164910.876 | 39612.538 | 22.648 | -142418.540 | 4     | 2495   | 0.002 | -144940.007 | 3     | 2494   | 0.001 |
| 87                      | -161779.915 | 47912.879 | 21.864 | -138748.272 | 2     | 2497   | 0.001 | -140962.399 | 2     | 2497   | 0.001 |
| 88                      | -162074.523 | 37836.151 | 22.406 | -139808.432 | 0     | 2500   | 0.000 | -142261.873 | 0     | 2500   | 0.000 |
| 89                      | -191538.400 | 50966.269 | 26.728 | -165173.904 | 3     | 2496   | 0.001 | -168157.735 | 2     | 2496   | 0.001 |
| 90                      | -157228.947 | 36589.536 | 21.084 | -135754.443 | 3     | 2494   | 0.001 | -138167.619 | 3     | 2494   | 0.001 |
| 91                      | -185836.576 | 46532.154 | 25.400 | -160340.334 | 2     | 2500   | 0.001 | -163051.032 | 2     | 2500   | 0.001 |
| 92                      | -164304.978 | 41430.308 | 22.074 | -141541.676 | 0     | 2500   | 0.000 | -143884.724 | 0     | 2500   | 0.000 |
| 93                      | -171399.676 | 40173.962 | 23.399 | -147835.289 | 2     | 2498   | 0.001 | -150452.394 | 2     | 2498   | 0.001 |
| 94                      | -168502.348 | 39858.368 | 23.961 | -145693.792 | 0     | 2497   | 0.000 | -148250.406 | 0     | 2497   | 0.000 |
| 95                      | -169889.358 | 36368.151 | 23.719 | -147184.331 | 0     | 2500   | 0.000 | -149816.292 | 0     | 2500   | 0.000 |
| 96                      | -175385.620 | 49128.412 | 23.328 | -151362.381 | 0     | 2496   | 0.000 | -153923.833 | 0     | 2496   | 0.000 |
| 97                      | -176025.375 | 49766.360 | 23.751 | -150630.632 | 4     | 2494   | 0.002 | -153220.924 | 4     | 2494   | 0.002 |
| 98                      | -176271.186 | 43667.941 | 24.228 | -152274.629 | 0     | 2496   | 0.000 | -154873.445 | 0     | 2496   | 0.000 |
| 99                      | -179614.118 | 40877.422 | 25.537 | -154953.586 | 0     | 2500   | 0.000 | -157724.119 | 0     | 2500   | 0.000 |
| 100                     | -161736.391 | 43905.483 | 21.868 | -138413.034 | 0     | 2500   | 0.000 | -140791.589 | 0     | 2500   | 0.000 |
| <b>Mean</b>             | -169449.633 | 44440.000 | 22.939 | -145872.765 | 1.01  | 2495.5 |       | -148349.4   | 1.02  | 2495.5 |       |
| <b>Std. Err.</b>        | 1174.447    | 664.452   | 0.179  | 1008.386    | 0.109 | 2.799  |       | 1025.792    | 0.109 | 2.799  |       |
| <b>Passing Rate (%)</b> |             |           |        |             |       |        | 0     |             |       |        | 0     |

\* The column legends are the same as Table S2.
