# Supplementary material for: Cross-Scale Analyses of Animal and Human Gut Microbiome Assemblies from Metacommunity to Global Landscape
Source: PubMed Central journal article supplement (PMC8407200; doi:10.1128/msystems.00633-21), 2021-07-06
Supplement: msystems.00633-21-st007.pdf [file msystems.00633-21-st007.pdf]

**Table S7.** The *Spearman*'s correlation coefficients ( $R$ ) between the MSN model parameters ( $\theta$ ,  $M$ ) and the PT (phylogenetic timeline) of 179 host animal species or 10 animal classes

| Host Taxon Level                                                                   | $M$ vs. PT |            | $\theta$ vs. PT |            | $M$ vs. $\theta$ |            |
|------------------------------------------------------------------------------------|------------|------------|-----------------|------------|------------------|------------|
|                                                                                    | $R$        | $p$ -value | $R$             | $p$ -value | $R$              | $p$ -value |
| AGM (Animal gut microbiome)                                                        |            |            |                 |            |                  |            |
| Species                                                                            | -0.326     | 0.000      | -0.122          | 0.105      | 0.163            | 0.030      |
| Class                                                                              | -0.251     | 0.515      | -0.469          | 0.203      | 0.189            | 0.608      |
| AGM + AGP (American Gut microbiome Project) + CGP (Chinese Gut microbiome Project) |            |            |                 |            |                  |            |
| Species                                                                            | -0.335     | 0.000      | -0.115          | 0.124      | 0.151            | 0.043      |
