# Supplementary material for: Cross-Scale Analyses of Animal and Human Gut Microbiome Assemblies from Metacommunity to Global Landscape
Source: PubMed Central journal article supplement (PMC8407200; doi:10.1128/msystems.00633-21), 2021-07-06
Supplement: msystems.00633-21-st008.pdf [file msystems.00633-21-st008.pdf]

**Table S8.** The classification table from the logistic regression (LR) analysis of the MSN parameters at the host species level [ $X=PT$ ,  $Y=$ Probability of Non-Neutral ( $0$ ) vs. Neutral ( $1$ )]

|                                                                                                                   | Estimated Occurrences |                     |                      |                     |
|-------------------------------------------------------------------------------------------------------------------|-----------------------|---------------------|----------------------|---------------------|
| Actual Occurrences                                                                                                | $0$ (Non-neutral)     | $1$ (Neutral)       | Total                |                     |
| $0$ (Non-neutral)                                                                                                 | 101                   | 7                   | 108                  |                     |
| $1$ (Neutral)                                                                                                     | 55                    | 16                  | 71                   |                     |
| Total                                                                                                             | 156                   | 23                  | 179                  |                     |
| <b>Percentage Correctly Classified = 65.4%</b>                                                                    |                       |                     |                      |                     |
| <b>Parameters from the LT of the PT-Neutrality Relationship (Reference Group <math>Y=0</math> or Non-neutral)</b> |                       |                     |                      |                     |
| Variable (Factor)                                                                                                 | LR Coefficient (B)    | Standard Error of B | P-value of Wald Test | Odds Ratio: Exp (B) |
| PD ( $B_1$ )                                                                                                      | 0.008*                | 0.002               | 0.0016               | 1.007               |
| Intercept ( $B_0$ )                                                                                               | -0.812                | 0.196               | <0.0001              | 0.444               |

\*The positive LR coefficient corresponding the PD suggests that more ancient species (with larger PD) are more likely to host non-neutral gut microbiome and more recent species such as humans are more likely to host neutral microbiomes.
